# Supplementary material for: Social isolation, loneliness and subsequent risk of major adverse cardiovascular events among individuals with type 2 diabetes mellitus
Source: PubMed Central journal article supplement — Gen Psychiatr. 2023 Dec 27;36(6):e101153. doi: 10.1136/gpsych-2023-101153 (PMC10759055; doi:10.1136/gpsych-2023-101153), 2023-12-27
Supplement: gpsych-2023-101153supp001.pdf [file gpsych-2023-101153supp001.pdf]

## Supplement

### Title: Social isolation, loneliness, and subsequent risk for major adverse cardiovascular events among individuals with type 2 diabetes mellitus

|                      |                                                                                                                                                                                                                                                                   |    |
|----------------------|-------------------------------------------------------------------------------------------------------------------------------------------------------------------------------------------------------------------------------------------------------------------|----|
| Supplemental Methods |                                                                                                                                                                                                                                                                   | 3  |
| eText 1              | Detailed information on inclusion and exclusion of this study                                                                                                                                                                                                     | 3  |
| eText 2              | Assessment of social isolation and loneliness in the UK Biobank                                                                                                                                                                                                   | 3  |
| eText 3              | Assessment of covariates in the UK Biobank                                                                                                                                                                                                                        | 3  |
| eText 4              | Imputation procedure                                                                                                                                                                                                                                              | 4  |
| eTable 1             | Assessment of covariates in the UK Biobank                                                                                                                                                                                                                        | 6  |
| Supplemental Results |                                                                                                                                                                                                                                                                   | 8  |
| eTable 2             | The number (percentage) of participants with missing covariate data in the analytic sample                                                                                                                                                                        | 8  |
| eTable 3             | Comparison of baseline characteristics between the total sample of the UK Biobank and the participants included in the present analysis                                                                                                                           | 10 |
| eTable 4             | Associations of social isolation with subsequent risk for mortality, myocardial infarction, and stroke in patients with type 2 diabetes mellitus                                                                                                                  | 12 |
| eTable 5             | Associations of loneliness with subsequent risk for mortality, myocardial infarction, and stroke in patients with type 2 diabetes mellitus                                                                                                                        | 16 |
| eTable 6             | Sensitivity analyses of joint associations of social isolation and loneliness with subsequent risk of mortality, myocardial infarction, and stroke in patients with type 2 diabetes mellitus                                                                      | 19 |
| eTable 7             | Sensitivity analyses of associations of social isolation and its items with subsequent risk for mortality, myocardial infarction, and stroke in sample with complete cases                                                                                        | 24 |
| eTable 8             | Sensitivity analyses of associations of loneliness and its items with subsequent risk for mortality, myocardial infarction, and stroke in sample with complete cases                                                                                              | 28 |
| eTable 9             | Sensitivity analyses of associations of social isolation and its items with subsequent risk for mortality, myocardial infarction, and stroke in sample with imputed data on exposures                                                                             | 31 |
| eTable 10            | Sensitivity analyses of associations of loneliness and its items with subsequent risk for mortality, myocardial infarction, and stroke in sample with imputed data on exposures                                                                                   | 35 |
| eTable 11            | Sensitivity analyses of associations of social isolation and its items with subsequent risk for mortality, myocardial infarction, and stroke after excluding events occurring within the first two years                                                          | 38 |
| eTable 12            | Sensitivity analyses of associations of loneliness and its items with subsequent risk for mortality, myocardial infarction, and stroke after excluding events occurring within the first two years                                                                | 42 |
| eTable 13            | Sensitivity analyses of associations of social isolation and its items with subsequent risk for mortality, myocardial infarction, and stroke in sample by censoring up to Dec 31, 2019 (this date was considered as the start of the COVID-19 pandemic in the UK) | 45 |
| eTable 14            | Sensitivity analyses of associations of loneliness and its items with subsequent risk for mortality, myocardial infarction, and stroke in sample by censoring up to Dec 31, 2019 (this date was considered as the start of the COVID-19 pandemic in the           | 49 |

|           |                                                                                                                                                                                                    |    |
|-----------|----------------------------------------------------------------------------------------------------------------------------------------------------------------------------------------------------|----|
|           | UK)                                                                                                                                                                                                |    |
| eTable 15 | Sensitivity analyses of associations of social isolation and its items with subsequent risk for mortality, myocardial infarction, and stroke with follow-up of six years                           | 52 |
| eTable 16 | Sensitivity analyses of associations of social isolation and its items with subsequent risk for mortality, myocardial infarction, and stroke excluding the events occurring in the first six years | 56 |
| eTable 17 | Sensitivity analyses of associations of loneliness and its items with subsequent risk for mortality, myocardial infarction, and stroke with follow-up of six years                                 | 60 |
| eTable 18 | Sensitivity analyses of associations of loneliness and its items with subsequent risk for mortality, myocardial infarction, and stroke excluding the events occurring in the first six years       | 63 |
| eTable 19 | Mediation analysis for the association between social isolation, loneliness, and subsequent risk of mortality and MACE                                                                             | 66 |
| eTable 20 | Hazard ratios and 95% CI from the Fine-Gray subdistribution Hazard Models for composites of incident myocardial infarction or stroke                                                               | 69 |
| eTable 21 | Multivariable-adjusted hazard ratios of mortality and composites of myocardial infarction or stroke for social isolation across subgroups                                                          | 71 |
| eTable 22 | Multivariable-adjusted hazard ratios of mortality and composites of myocardial infarction or stroke for loneliness across subgroups                                                                | 73 |
| eTable 23 | Multivariable-adjusted hazard ratios of social isolation and loneliness with subsequent risk for mortality, myocardial infarction, and stroke                                                      | 75 |

## Supplemental Methods:

### eText 1. Detailed information on inclusion and exclusion of this study

The present study included individuals with type 2 diabetes mellitus (T2DM) at baseline that was confirmed by integrating multiple data sources.[1] First, we identified the presence of T2DM using a validated algorithm integrating data regarding self-reported disease, medications, and medical history.[2] The UK Biobank team collected data through a touchscreen questionnaire and verbal interviews by a trained nurse at baseline. Second, participants with an HbA1c level  $\geq 6.5\%$  ( $\geq 48$  mmol/mol)[3] were considered as having prevalent diabetes mellitus. Subsequently, we excluded participants with probable type 1 diabetes mellitus or gestational diabetes mellitus, which were ascertained by using the algorithm mentioned above.[2] We excluded participants who did not respond to online survey assessing social isolation or loneliness and those who had invalid data of exposures (respond “prefer not to answer” or “don’t know” to the questionnaires). Next, those with existing ischaemic heart disease (including myocardial infarction), stroke, or cancer at baseline were also excluded. Thus, 19 360 participants with T2DM were included in the main analysis.

### eText 2. Assessment of social isolation and loneliness in the UK Biobank

At baseline, social isolation and loneliness were assessed with a touchscreen questionnaire using five questions, which are listed Supplemental in the UK Biobank. (<https://biobank.ndph.ox.ac.uk/showcase/refer.cgi?id=446>).

#### Social isolation was assessed with the following three questions:

##### Subitem 1: Live alone:

a) “Including yourself, how many people are living together in your household?” (1 point was given for living alone; field ID: 709);

##### Subitem 2: Contact with family/friends or groups:

b) “How often do you visit friends or family or have them visit you?” (1 point was given for answering about once a month, once every few months, never or almost never, or no friends or family outside the household; field ID: 1031);

c) “Which of the following (sports club or gym, pub or social club, religious group, adult education class, other group activity) do you engage in once a week or more often?” (1 point was given for answering none of the above; field ID: 6160).

Thus, individuals could score a total of 0-3. Individuals were defined as least isolated if they scored 0, moderately isolated if they scored 1, and most isolated if they scored 2 or 3. Individuals were defined little contact with family/friends or groups when they scored 1 or 2 on the two questions about the family or friends and about groups. Similar scales have been used previously in other UK studies.

#### Loneliness was assessed with two questions:

##### Subitem 1: Lonely:

a) “Do you often feel lonely?” (1 point was given for answering yes; field ID: 2020);

##### Subitem 2: Able to confide:

b) “How often are you able to confide in someone close to you?” (1 point was given for answering never or almost never; field ID: 2110).

The individual was defined as lonely if they scored 2. Similar questions are included in scales such as the revised UCLA Loneliness Scale.

### eText 3. Assessment of potential covariates and mediators in the UK Biobank

We used the self-reported questionnaires, physical-measured variables, and medical history to assess the confounders. Age (continuous, calculated from dates of birth; field ID 21003), sex (Female, Male; field ID 31), assessment centre (England, Scotland, Wales; field ID 54), and Townsend Deprivation Index (continuous; a

higher score indicates a higher degree of deprivation which was based on postcode; field ID 189) were known before arrival at the Assessment Centre.

The following covariate data were obtained from touchscreen questions or verbal interview at baseline: ethnicity (White, Others; field ID 21000), current employment status (employed, unemployed; field ID 6142), education level (college or university degree, non-college or university degree; field ID 6138), smoking status (never, current, past; field ID 20116), alcohol consumption status (not current, less than three times a week, three or more times a week; field ID 1558), physical activity (continuous, MET, metabolic equivalent task-summed days; field ID 22033), TV watching time (continuous, hours, day; field ID 1070), healthy diet score (continuous, 0-5 points; field ID 1289, 1299, 1309, 1319, 1329, 1339, 1369, 1379, 1389, and 1349), self-reported sleep duration (short: <7 hours/day, normal: 7 to 8 hours/day, and long: >8 hours/day; field ID 1160), ever seeking help from physicians due to anxiety or depressive symptoms (yes/no; field ID 2100 and 2090), family history of diabetes (yes/no; field ID 20107 and 20110), and diabetes medication use (oral antidiabetic drug only/insulin/ neither, field ID 20003, 6153 and 6177).

The healthy diet score was calculated by using the following dietary factors: vegetable intake at least four tablespoons each day (median); fruits intake at least three pieces each day (median); fish intake at least twice each week (median); unprocessed red meat intake no more than twice each week (median); and processed meat intake no more than two each week (median). Each one point was given for each favourable diet factor, with the total diet score ranging from 0 to 5.

Obesity status (underweight or normal-weight, overweight, obese; field ID 21001), grip strength (continuous; field ID 46 and 47), systolic blood pressure (continuous, mmHg, field ID 4080 and 93), diastolic blood pressure (continuous, mmHg, field ID 4079 and 94) were collected by physical measurements. HbA1c (<53 or  $\geq$ 53 mmol/mol, 7%; according to ADA guideline; field ID 30750) was measured with high-performance liquid chromatography analysis on a Bio-Rad VARIANT II TURBO analyser. Diabetes duration (ICD: E110-E119), obtained from self-reported data or the hospital records and death registries, was calculated as the years between first onset of diabetes and baseline for diagnosed patients, while diabetes duration was assigned as 0 years for those undiagnosed patients[4]. Estimated glomerular filtration rate (continuous, mL/min, field ID 21003, 31, 21000, 30700) was calculated by the Chronic Kidney Disease Epidemiology Collaboration equation[5]. Anxiety (ICD: F40-F41) and depression (ICD: F32 [single episode depression], F33 [recurrent depression], F34 [persistent mood disorders], F38 [other mood disorders], and F39 [unspecified mood disorders]) were obtained through hospital inpatient records. Information on prevalent diseases (hyperlipidaemia, chronic kidney disease, diabetes-related microvascular disease, neurodegenerative disease, respiratory disease, digestive disease, rheumatoid arthritis, osteoarthritis) was obtained through self-reported and hospital inpatient records (eTable 1).

We constructed two regression models: a Cox proportional hazard model to regress the outcome on the exposure and the mediator, and a linear model to regress the mediator on the exposure. The two regression models were adjusted for age, sex, ethnicity, assessment centres, employment status, education, and Townsend Deprivation Index. We used regression-based approaches[6] to estimate the total effect, total natural indirect effect (TNIE), and total natural direct effect (TNDE). The TNDE presents the effect of the exposure (social isolation/loneliness) on the outcome that was independent of the mediators. The TNIE presents the proportion of exposure that could be explained by its association with the mediators. To quantify the magnitude of mediation, the proportion of mediating effect was estimated by the mediator (TNIE/[TNDE + TNIE]). We used bootstrapping (1000 replications) to obtain the correct 95% CIs.

#### **eText 4. Imputation procedure**

We used the "mice" package (v3.13.0) in R to conduct multiple imputations for missing values. [eTable 2](#) provides detailed information on the numbers (percentages) and patterns of missing data for the covariates, which were imputed in the main analyses. For the sensitivity analysis wherein the invalid values of social isolation or loneliness were imputed, we included the participants who gave responses of 'prefer not to answer' or 'don't know' (which were defined as invalid data). To conduct the multiple imputation for both main and sensitivity analyses, following Sterne et al.'s recommendations (3), we included the exposures, covariates, disease and mortality outcomes, and time to these outcomes as predictors in the imputation models. We generated 20 imputed datasets with a maximum of 20 iterations to impute missing values using Rubin's rules to estimate the effects.

### References

1. Tan X, Benedict C. Increased risk of myocardial infarction among patients with type 2 diabetes who carry the common rs10830963 variant in the MTNR1B gene. *Diabetes Care* 2020;43(9):2289-92.
2. Eastwood SV, Mathur R, Atkinson M, Brophy S, Sudlow C, Flaig R, et al. Algorithms for the capture and adjudication of prevalent and incident diabetes in UK Biobank. *PLoS One* 2016;11(9):e0162388.
3. International Expert Committee report on the role of the A1C assay in the diagnosis of diabetes. *Diabetes Care* 2009;32(7):1327-34.
4. Han H, Cao Y, Feng C, et al. Association of a healthy lifestyle with all-cause and cause-specific mortality among individuals with type 2 diabetes: a prospective study in UK Biobank. *Diabetes care* 2022;45(2):319-29.
5. Levey AS, Stevens LA, Schmid CH, et al. A new equation to estimate glomerular filtration rate. *Ann Intern Med* 2009;150(9):604-12.
6. VanderWeele TJ. Mediation analysis: a practitioner's guide. *Annu Rev Public Health* 2016;37:17-32.

**eTable 1. Information about exposures, outcomes, covariates, and mediators**

| Variables                                                                                              | Field ID/ ICD-10 codes                                        |
|--------------------------------------------------------------------------------------------------------|---------------------------------------------------------------|
| <b>Exposures</b>                                                                                       |                                                               |
| Social isolation                                                                                       | Field ID 709/1031/6160                                        |
| Loneliness                                                                                             | Field ID 2020/2110                                            |
| <b>Outcomes</b>                                                                                        |                                                               |
| All-cause mortality                                                                                    | ICD A00-U89                                                   |
| CVD cause mortality                                                                                    | ICD I00-I99                                                   |
| Myocardial infarction                                                                                  | ICD I21/I22/I23/I24.1/I25.2                                   |
| Stroke                                                                                                 | ICD I60–I64, I69                                              |
| <b>Potential covariates and mediators</b>                                                              |                                                               |
| Age (continuous, years)                                                                                | Field ID 21003                                                |
| Sex (male/female)                                                                                      | Field ID 31                                                   |
| Ethnicity (White/others)                                                                               | Field ID 21000                                                |
| Assessment centre (England/Scotland/Wales)                                                             | Field ID 54                                                   |
| Current employment status<br>(employed/unemployed)                                                     | Field ID 6142                                                 |
| Education level (college or university<br>degree/non-college or university degree)                     | Field ID 6138                                                 |
| Townsend Deprivation Index (continuous, a<br>higher score indicates a higher degree of<br>deprivation) | Field ID 189                                                  |
| Smoking status (never/current/past)                                                                    | Field ID 20116                                                |
| Alcohol consumption status (not current/less<br>than three times a week/three or more times a<br>week) | Field ID 1558                                                 |
| Physical activity (MET Score) (continuous,<br>metabolic equivalent task-summed days)                   | Field ID 22033                                                |
| TV watching time (continuous, hours/day)                                                               | Field ID 1070                                                 |
| Healthy diet score (continuous, 0–5 points)                                                            | Field ID<br>1289/1299/1309/1319/1329/1339/1349/1369/1379/1389 |
| Sleep duration (short: $\leq 6$ hours/day, normal:<br>7–8 hours/day, long: $\geq 9$ hours/day)         | Field ID 1160                                                 |
| Anxiety                                                                                                | ICD F40-F41                                                   |
| Depression                                                                                             | ICD F32/F33/F34/F38/F39                                       |
| Ever seeking help from physicians due to<br>anxiety or depressive symptoms (yes/no)                    | Field ID 2100 and 2090                                        |
| Obesity status (grouped using body mass<br>index, underweight or normal<br>weight/overweight/obese)    | Field ID 21001                                                |
| Grip strength (continuous, kg)                                                                         | Field ID 46/47                                                |
| Systolic blood pressure (continuous, mmHg)                                                             | Field ID 4080/93                                              |
| Diastolic blood pressure (continuous, mmHg)                                                            | Field ID 4079/94                                              |
| Hyperlipidaemia (yes/no)                                                                               | Field ID 20002/6153/6177                                      |

|                                                                        |                                                                                                                                                                                                                                                                                                                                                                           |
|------------------------------------------------------------------------|---------------------------------------------------------------------------------------------------------------------------------------------------------------------------------------------------------------------------------------------------------------------------------------------------------------------------------------------------------------------------|
|                                                                        | ICD E78                                                                                                                                                                                                                                                                                                                                                                   |
| Family history of diabetes (yes/no)                                    | Field ID 20107/20110                                                                                                                                                                                                                                                                                                                                                      |
| HbA1c (continuous, mmol/mol)                                           | Field ID 30750                                                                                                                                                                                                                                                                                                                                                            |
| Diabetes duration (continuous)                                         | ICD E110-E119                                                                                                                                                                                                                                                                                                                                                             |
| Diabetes medication use (oral antidiabetic drug only/insulin/ neither) | Field ID 20003/6153/6177                                                                                                                                                                                                                                                                                                                                                  |
| Estimated glomerular filtration rate (continuous, mL/min)              | Filed ID 21003/31/21000/30700                                                                                                                                                                                                                                                                                                                                             |
| Chronic kidney disease (yes/no)                                        | ICD I12, I12.0, I12.9, I13.1, I13.2, I13.9, N02, N03, N04, N05, N06, N07, N08.0-08.5, N08.8, N11, N11.0, N11.1, N11.8, N11.9, N16.5, N17.0-17.2, N17.8-17.9, N18.0-18.5, N18.8, N18.9, N19, N25.0, N26, N27, N27.0, N27.1, N27.9, N28.0, N39.1, Q60, Q60.0-60.6, Q61.1-61.5, Q63, Q63.0-63.3, Q63.8, Q63.9, R80, R94.4, T86.1, Z49, Z49.0-49.2, Z841, Z94.0, Z99.2, Z92.2 |
| Diabetes-related microvascular disease (yes/no)                        | ICD E113, E143, H280, H360, E114, E144, G730, G990, G590, G632, E116, E146                                                                                                                                                                                                                                                                                                |
| Neurodegenerative disease (yes/no)                                     | Field ID 20002<br>ICD F01-03, G122, G20, G21, G231-233, G238, G239, G30, G31                                                                                                                                                                                                                                                                                              |
| Respiratory disease (yes/no)                                           | Field ID 20002/6152<br>ICD J40-J44, J47                                                                                                                                                                                                                                                                                                                                   |
| Digestive disease (yes/no)                                             | Field ID 20002<br>ICD K70-K77                                                                                                                                                                                                                                                                                                                                             |
| Rheumatoid arthritis (yes/no)                                          | Field ID 20002<br>ICD M199                                                                                                                                                                                                                                                                                                                                                |
| Osteoarthritis (yes/no)                                                | Field ID 20002/6152<br>ICD M05-M06                                                                                                                                                                                                                                                                                                                                        |

---

MET, metabolic equivalent of task; ICD-10 codes, International Classification of Diseases, Tenth Revision.

**Supplemental Results:****eTable 2. The number (percentage) of participants with missing covariate data in the analytic sample**

| Covariates                                                              | N    | %     |
|-------------------------------------------------------------------------|------|-------|
| Age                                                                     | 0    | 0.00  |
| Sex                                                                     | 0    | 0.00  |
| Ethnicity                                                               | 71   | 0.37  |
| Assessment centre                                                       | 0    | 0.00  |
| Current employment status                                               | 161  | 0.83  |
| Education level                                                         | 265  | 1.37  |
| Townsend Deprivation Index                                              | 31   | 0.16  |
| Smoking status                                                          | 106  | 0.55  |
| Alcohol consumption status                                              | 15   | 0.08  |
| Physical activity (MET Score)                                           | 3563 | 18.40 |
| TV watching time                                                        | 224  | 1.16  |
| Healthy diet score                                                      | 3    | 0.02  |
| Sleep duration                                                          | 175  | 0.90  |
| Ever seeking help from physicians due to anxiety or depressive symptoms | 150  | 0.77  |
| Obesity status                                                          | 154  | 0.80  |
| Grip strength                                                           | 152  | 0.79  |
| Systolic blood pressure                                                 | 51   | 0.26  |
| Diastolic blood pressure                                                | 50   | 0.26  |
| Hyperlipidaemia                                                         | 0    | 0.00  |
| Family history of diabetes                                              | 858  | 4.43  |
| HbA1c                                                                   | 1205 | 6.22  |
| Diabetes duration                                                       | 1208 | 6.24  |
| Diabetes medication use                                                 | 1080 | 5.58  |
| Estimated glomerular filtration rate                                    | 1178 | 6.08  |
| Chronic kidney disease                                                  | 0    | 0.00  |
| Diabetes-related microvascular disease                                  | 0    | 0.00  |
| Neurodegenerative disease                                               | 569  | 2.94  |
| Respiratory disease                                                     | 569  | 2.94  |
| Digestive disease                                                       | 569  | 2.94  |
| Rheumatoid arthritis                                                    | 0    | 0.00  |
| Osteoarthritis                                                          | 569  | 2.94  |



MET, metabolic equivalent of task.

**eTable 3. Comparison of baseline characteristics between the total sample of the UK Biobank and the participants included in the present analysis**

| Characteristics                                                             | Total<br>(N = 502,505) | Excluded<br>(N = 483,145) | Included<br>(N = 19,360) |
|-----------------------------------------------------------------------------|------------------------|---------------------------|--------------------------|
| Age, mean (SD), yrs                                                         | 56.5 (8.1)             | 56.4 (8.1)                | 59.4 (7.0)               |
| Sex, male (%)                                                               | 229,122 (45.6)         | 217,302 (45.0)            | 11,820 (61.1)            |
| Ethnicity, White (%)                                                        | 472,695 (94.1)         | 455,700 (94.3)            | 16,995 (87.8)            |
| Assessment centre (%)                                                       |                        |                           |                          |
| England                                                                     | 445,855 (88.7)         | 428,618 (88.7)            | 17,237 (89.0)            |
| Scotland                                                                    | 35,841 (7.1)           | 34,608 (7.2)              | 1233 (6.4)               |
| Wales                                                                       | 20,808 (4.1)           | 19,918 (4.1)              | 890 (4.6)                |
| Currently employed (%)                                                      | 287,149 (57.1)         | 278,679 (57.7)            | 8470 (43.8)              |
| College or university degree (%)                                            | 161,163 (32.1)         | 156,449 (32.4)            | 4714 (24.3)              |
| Townsend Deprivation Index*                                                 | -1.3 (3.1)             | -1.3 (3.1)                | -0.5 (3.4)               |
| Current smokers (%)                                                         | 52,978 (10.5)          | 50,768 (10.5)             | 2210 (11.4)              |
| Alcohol consumption status (%)                                              |                        |                           |                          |
| Not current                                                                 | 40,635 (8.1)           | 37,773 (7.8)              | 2862 (14.8)              |
| Less than three times a week                                                | 243,131 (48.4)         | 232,595 (48.1)            | 10,536 (54.4)            |
| Three or more times a week                                                  | 217,194 (43.2)         | 211,247 (43.7)            | 5947 (30.7)              |
| Physical activity (MET Score), mean (SD)                                    | 10.6 (4.8)             | 10.7 (4.8)                | 9.7 (5.0)                |
| TV watching time (hours/day), mean (SD)                                     | 2.8 (1.7)              | 2.8 (1.7)                 | 3.4 (2.0)                |
| Healthy diet score, median [IQR]                                            | 3 [2-4]                | 3 [2-4]                   | 3 [2-4]                  |
| Sleep duration (%)                                                          |                        |                           |                          |
| Short (<7 hours/day)                                                        | 123,252 (24.5)         | 117,870 (24.4)            | 5382 (27.8)              |
| Normal (7-8 hours/day)                                                      | 340,906 (67.8)         | 329,187 (68.1)            | 11,719 (60.5)            |
| Long (>8 hours/day)                                                         | 38,347 (7.6)           | 36,088 (7.5)              | 2259 (11.7)              |
| Anxiety (%)                                                                 | 1750 (0.3)             | 1661 (0.3)                | 89 (0.5)                 |
| Depression (%)                                                              | 4765 (0.9)             | 4469 (0.9)                | 296 (1.5)                |
| Ever seeking help from physicians due to anxiety or depressive symptoms (%) | 173,164 (34.5)         | 166,422 (34.4)            | 6742 (34.8)              |
| Obesity status (kg/m <sup>2</sup> )                                         |                        |                           |                          |
| Underweight or normal weight (%)                                            | 165,020 (32.8)         | 163,139 (33.8)            | 1881 (9.7)               |
| Overweight (%)                                                              | 212,098 (42.2)         | 205,599 (42.6)            | 6499 (33.6)              |
| Obese (%)                                                                   | 122,238 (24.3)         | 111,412 (23.1)            | 10,826 (55.9)            |
| Grip strength (kg), mean (SD)                                               | 30.6 (11.0)            | 30.6 (11.0)               | 30.6 (11.1)              |

|                                                                             |                |                |               |
|-----------------------------------------------------------------------------|----------------|----------------|---------------|
| Systolic blood pressure (mmHg), mean (SD)                                   | 140 (20)       | 140 (20)       | 145 (18)      |
| Diastolic blood pressure (mmHg), mean (SD)                                  | 82 (11)        | 82 (11)        | 83 (10)       |
| Hyperlipidaemia (%)                                                         | 94,027 (18.7)  | 80,762 (16.7)  | 13,265 (68.5) |
| Estimated glomerular filtration rate, mean (SD), mL/min/1.73 m <sup>2</sup> | 90.8 (13.4)    | 90.8 (13.3)    | 89.9 (15.6)   |
| Family history of diabetes (%)                                              | 85,798 (17.1)  | 79,052 (16.4)  | 6746 (34.8)   |
| HbA1c, median [IQR], %                                                      | 5.4 [5.2-5.6]  | 5.4 [5.1-5.6]  | 6.8 [6.2-7.5] |
| Diabetes duration, median [IQR], yrs                                        | 1.0 [0.0-6.0]  | -              | 4.0 [1.0-8.0] |
| Diabetes medication use (%)                                                 |                |                |               |
| Neither                                                                     | 344,899 (68.6) | 338,282 (70.0) | 6617 (34.2)   |
| Oral antidiabetic drug only                                                 | 13,404 (2.7)   | 4181 (0.9)     | 9223 (47.6)   |
| Insulin                                                                     | 5695 (1.1)     | 3255 (0.7)     | 2440 (12.6)   |
| Chronic kidney disease (%)                                                  | 3618 (0.7)     | 3 290 (0.7)    | 328 (1.7)     |
| Diabetes-related microvascular disease (%)                                  | 1008 (0.2)     | 687 (0.1)      | 321 (1.7)     |
| Neurodegenerative disease (%)                                               | 1320 (0.3)     | 1270 (0.3)     | 50 (0.3)      |
| Respiratory disease (%)                                                     | 11,426 (2.3)   | 10,709 (2.2)   | 717 (3.7)     |
| Digestive disease (%)                                                       | 2291 (0.5)     | 2030 (0.4)     | 261 (1.3)     |
| Rheumatoid arthritis (%)                                                    | 5658 (1.1)     | 5348 (1.1)     | 310 (1.6)     |
| Osteoarthritis (%)                                                          | 40,684 (8.1)   | 38,586 (8.0)   | 2098 (10.8)   |

\*Positive values of the index will indicate areas with high material deprivation, whereas those with negative values will indicate relative affluence.

IQR, interquartile range; MET, metabolic equivalent of task; SD, standard deviation.

**eTable 4. Associations of social isolation with subsequent risk for mortality, myocardial infarction, and stroke in patients with type 2 diabetes mellitus**

| Outcomes                                               | Exposures                  | N    | Incident rate (per 1000 person-years) | Model 1*<br>HR (95% CI) | Model 2†<br>HR (95% CI) | Model 3‡<br>HR (95% CI) |
|--------------------------------------------------------|----------------------------|------|---------------------------------------|-------------------------|-------------------------|-------------------------|
| <b>Mortality</b>                                       |                            |      |                                       |                         |                         |                         |
| All-cause mortality                                    | <b>Social isolation</b>    |      |                                       |                         |                         |                         |
|                                                        | Moderately vs. least       | 8147 | 12.2                                  | 1.28 (1.17-1.39)        | 1.18 (1.08-1.28)        | 1.16 (1.06-1.27)        |
|                                                        | Most vs. least             | 3804 | 15.4                                  | 1.70 (1.54-1.88)        | 1.36 (1.22-1.51)        | 1.33 (1.19-1.47)        |
|                                                        | <b>Items</b>               |      |                                       |                         |                         |                         |
|                                                        | Contacts (little vs. more) | 9601 | 12.9                                  | 1.25 (1.16-1.35)        | 1.13 (1.04-1.22)        | 1.10 (1.02-1.19)        |
|                                                        | Live alone (yes vs. no)    | 4602 | 16.3                                  | 1.55 (1.43-1.68)        | 1.30 (1.20-1.42)        | 1.31 (1.20-1.42)        |
| CVD mortality                                          | <b>Social isolation</b>    |      |                                       |                         |                         |                         |
|                                                        | Moderately vs. least       | 8147 | 6.1                                   | 1.39 (1.23-1.57)        | 1.25 (1.10-1.42)        | 1.22 (1.08-1.39)        |
|                                                        | Most vs. least             | 3804 | 7.7                                   | 1.85 (1.61-2.13)        | 1.41 (1.21-1.64)        | 1.36 (1.17-1.59)        |
|                                                        | <b>Items</b>               |      |                                       |                         |                         |                         |
|                                                        | Contacts (little vs. more) | 9601 | 6.5                                   | 1.33 (1.20-1.48)        | 1.16 (1.04-1.30)        | 1.13 (1.01-1.26)        |
|                                                        | Live alone (yes vs. no)    | 4602 | 8.2                                   | 1.65 (1.47-1.84)        | 1.36 (1.21-1.54)        | 1.37 (1.22-1.55)        |
| <b>Overall</b>                                         |                            |      |                                       |                         |                         |                         |
| Composites of incident myocardial infarction or stroke | <b>Social isolation</b>    |      |                                       |                         |                         |                         |
|                                                        | Moderately vs. least       | 8147 | 10.1                                  | 1.12 (1.02-1.23)        | 1.02 (0.93-1.12)        | 1.01 (0.92-1.11)        |
|                                                        | Most vs. least             | 3804 | 11.1                                  | 1.26 (1.13-1.41)        | 1.01 (0.90-1.14)        | 1.00 (0.88-1.12)        |

|                                                     |  |                            |      |      |                  |                  |                  |
|-----------------------------------------------------|--|----------------------------|------|------|------------------|------------------|------------------|
|                                                     |  | <b>Items</b>               |      |      |                  |                  |                  |
|                                                     |  | Contacts (little vs. more) | 9601 | 10.3 | 1.10 (1.01-1.19) | 0.98 (0.90-1.07) | 0.97 (0.89-1.05) |
|                                                     |  | Live alone (yes vs. no)    | 4602 | 11.5 | 1.22 (1.11-1.34) | 1.05 (0.96-1.16) | 1.05 (0.95-1.16) |
| Incident myocardial infarction                      |  | <b>Social isolation</b>    |      |      |                  |                  |                  |
|                                                     |  | Moderately vs. least       | 8147 | 6.5  | 1.09 (0.97-1.22) | 1.00 (0.89-1.12) | 0.98 (0.88-1.11) |
|                                                     |  | Most vs. least             | 3804 | 7.3  | 1.26 (1.10-1.45) | 1.02 (0.88-1.18) | 1.01 (0.87-1.16) |
|                                                     |  | <b>Items</b>               |      |      |                  |                  |                  |
|                                                     |  | Contacts (little vs. more) | 9601 | 6.7  | 1.10 (0.99-1.21) | 0.98 (0.88-1.09) | 0.97 (0.87-1.07) |
|                                                     |  | Live alone (yes vs. no)    | 4602 | 7.3  | 1.18 (1.05-1.33) | 1.03 (0.91-1.17) | 1.03 (0.91-1.16) |
| Incident stroke                                     |  | <b>Social isolation</b>    |      |      |                  |                  |                  |
|                                                     |  | Moderately vs. least       | 8147 | 4.1  | 1.17 (1.01-1.35) | 1.06 (0.92-1.23) | 1.05 (0.91-1.22) |
|                                                     |  | Most vs. least             | 3804 | 4.3  | 1.25 (1.05-1.50) | 1.00 (0.83-1.20) | 0.98 (0.81-1.18) |
|                                                     |  | <b>Items</b>               |      |      |                  |                  |                  |
|                                                     |  | Contacts (little vs. more) | 9601 | 4.0  | 1.08 (0.95-1.23) | 0.98 (0.85-1.11) | 0.96 (0.84-1.10) |
|                                                     |  | Live alone (yes vs. no)    | 4602 | 4.8  | 1.29 (1.12-1.49) | 1.10 (0.94-1.28) | 1.10 (0.94-1.28) |
| <hr/>                                               |  |                            |      |      |                  |                  |                  |
| <b>Fatal events</b>                                 |  |                            |      |      |                  |                  |                  |
| Composites of fatal myocardial infarction or stroke |  | <b>Social isolation</b>    |      |      |                  |                  |                  |
|                                                     |  | Moderately vs. least       | 8147 | 0.7  | 1.52 (1.05-2.20) | 1.35 (0.92-1.96) | 1.33 (0.92-1.95) |
|                                                     |  | Most vs. least             | 3804 | 1.2  | 2.55 (1.72-3.79) | 1.90 (1.25-2.89) | 1.89 (1.24-2.87) |
|                                                     |  | <b>Items</b>               |      |      |                  |                  |                  |

|                                                         |                            |      |      |                  |                  |                  |
|---------------------------------------------------------|----------------------------|------|------|------------------|------------------|------------------|
|                                                         | Contacts (little vs. more) | 9601 | 0.9  | 1.60 (1.18-2.18) | 1.36 (1.00-1.87) | 1.35 (0.98-1.85) |
|                                                         | Live alone (yes vs. no)    | 4602 | 1.1  | 1.97 (1.44-2.70) | 1.60 (1.14-2.24) | 1.60 (1.14-2.24) |
| Fatal myocardial infarction                             | <b>Social isolation</b>    |      |      |                  |                  |                  |
|                                                         | Moderately vs. least       | 8147 | 0.5  | 1.41 (0.93-2.14) | 1.26 (0.82-1.92) | 1.26 (0.82-1.92) |
|                                                         | Most vs. least             | 3804 | 1.0  | 2.63 (1.69-4.08) | 1.96 (1.23-3.13) | 1.94 (1.22-3.10) |
|                                                         | <b>Items</b>               |      |      |                  |                  |                  |
|                                                         | Contacts (little vs. more) | 9601 | 0.7  | 1.57 (1.11-2.22) | 1.34 (0.94-1.92) | 1.33 (0.93-1.89) |
|                                                         | Live alone (yes vs. no)    | 4602 | 0.9  | 2.05 (1.44-2.91) | 1.64 (1.13-2.40) | 1.65 (1.13-2.40) |
| Fatal stroke                                            | <b>Social isolation</b>    |      |      |                  |                  |                  |
|                                                         | Moderately vs. least       | 8147 | 0.2  | 2.08 (0.94-4.60) | 1.77 (0.79-3.96) | 1.76 (0.78-3.93) |
|                                                         | Most vs. least             | 3804 | 0.2  | 2.24 (0.89-5.65) | 1.60 (0.61-4.22) | 1.62 (0.61-4.29) |
|                                                         | <b>Items</b>               |      |      |                  |                  |                  |
|                                                         | Contacts (little vs. more) | 9601 | 0.2  | 1.62 (0.84-3.13) | 1.32 (0.67-2.59) | 1.31 (0.66-2.57) |
|                                                         | Live alone (yes vs. no)    | 4602 | 0.2  | 1.86 (0.95-3.66) | 1.57 (0.76-3.22) | 1.60 (0.78-3.30) |
| <hr/>                                                   |                            |      |      |                  |                  |                  |
| <b>Non-fatal events</b>                                 |                            |      |      |                  |                  |                  |
| Composites of non-fatal myocardial infarction or stroke | <b>Social isolation</b>    |      |      |                  |                  |                  |
|                                                         | Moderately vs. least       | 8147 | 9.4  | 1.10 (1.00-1.21) | 1.00 (0.91-1.11) | 0.99 (0.90-1.10) |
|                                                         | Most vs. least             | 3804 | 9.9  | 1.19 (1.05-1.34) | 0.96 (0.84-1.08) | 0.94 (0.83-1.07) |
|                                                         | <b>Items</b>               |      |      |                  |                  |                  |
|                                                         | Contacts (little vs. more) | 9601 | 9.4  | 1.07 (0.98-1.16) | 0.96 (0.88-1.05) | 0.95 (0.87-1.03) |
|                                                         | Live alone (yes vs. no)    | 4602 | 10.4 | 1.17 (1.06-1.29) | 1.01 (0.91-1.12) | 1.01 (0.91-1.12) |

|                                 |                            |      |     |                  |                  |                  |  |
|---------------------------------|----------------------------|------|-----|------------------|------------------|------------------|--|
| Non-fatal myocardial infarction | <b>Social isolation</b>    |      |     |                  |                  |                  |  |
|                                 | Moderately vs. least       | 8147 | 5.9 | 1.07 (0.95-1.20) | 0.98 (0.87-1.10) | 0.97 (0.86-1.09) |  |
|                                 | Most vs. least             | 3804 | 6.3 | 1.17 (1.01-1.35) | 0.95 (0.81-1.11) | 0.94 (0.80-1.09) |  |
|                                 | <b>Items</b>               |      |     |                  |                  |                  |  |
|                                 | Contacts (little vs. more) | 9601 | 6.0 | 1.06 (0.95-1.18) | 0.95 (0.85-1.06) | 0.94 (0.84-1.05) |  |
|                                 | Live alone (yes vs. no)    | 4602 | 6.3 | 1.11 (0.98-1.26) | 0.98 (0.86-1.11) | 0.97 (0.86-1.11) |  |
| Non-fatal stroke                | <b>Social isolation</b>    |      |     |                  |                  |                  |  |
|                                 | Moderately vs. least       | 8147 | 3.9 | 1.14 (0.98-1.32) | 1.04 (0.90-1.21) | 1.03 (0.89-1.20) |  |
|                                 | Most vs. least             | 3804 | 4.1 | 1.23 (1.02-1.47) | 0.98 (0.81-1.18) | 0.96 (0.79-1.16) |  |
|                                 | <b>Items</b>               |      |     |                  |                  |                  |  |
|                                 | Contacts (little vs. more) | 9601 | 3.8 | 1.07 (0.93-1.22) | 0.96 (0.84-1.10) | 0.95 (0.83-1.09) |  |
|                                 | Live alone (yes vs. no)    | 4602 | 4.5 | 1.27 (1.10-1.47) | 1.08 (0.92-1.26) | 1.08 (0.93-1.26) |  |

\*Model 1 adjusted for age and sex;

†Model 2 additionally adjusted for ethnicity, assessment centre, current employment status, education level, Townsend Deprivation Index, smoking status, alcohol consumption status, physical activity (MET Score), TV watching time, healthy diet score, sleep duration, ever seeking help from physicians due to anxiety or depressive symptoms, obesity status, grip strength, systolic blood pressure, diastolic blood pressure, hyperlipidaemia, and social isolation/loneliness;

‡Model 3 additionally adjusted for estimated glomerular filtration rate, family history of diabetes, HbA1c, diabetes duration, diabetes medication use, chronic kidney disease, diabetes-related microvascular disease, neurodegenerative disease, respiratory disease, digestive disease, rheumatoid arthritis, and osteoarthritis.

CI, confidence interval; CVD, cardiovascular disease; HR, hazard ratio; MET, metabolic equivalent of task.

**eTable 5. Associations of loneliness with subsequent risk for mortality, myocardial infarction, and stroke in patients with type 2 diabetes mellitus**

| Outcomes                                               | Exposures                           | N    | Incident rate (per 1000 person-years) | Model 1*<br>HR (95% CI) | Model 2†<br>HR (95% CI) | Model 3‡<br>HR (95% CI) |
|--------------------------------------------------------|-------------------------------------|------|---------------------------------------|-------------------------|-------------------------|-------------------------|
| <b>Mortality</b>                                       |                                     |      |                                       |                         |                         |                         |
| All-cause mortality                                    | <b>Loneliness (yes vs. no)</b>      | 1487 | 14.1                                  | 1.34 (1.18-1.53)        | 1.00 (0.87-1.14)        | 1.00 (0.87-1.14)        |
|                                                        | <b>Items</b>                        |      |                                       |                         |                         |                         |
|                                                        | Lonely (yes vs. no)                 | 4570 | 13.4                                  | 1.40 (1.29-1.53)        | 1.12 (1.02-1.22)        | 1.11 (1.01-1.21)        |
|                                                        | Able to confide (never vs. usually) | 3849 | 14.7                                  | 1.27 (1.16-1.38)        | 1.09 (1.00-1.19)        | 1.07 (0.98-1.17)        |
| CVD mortality                                          | <b>Loneliness (yes vs. no)</b>      | 1487 | 7.2                                   | 1.41 (1.17-1.69)        | 1.03 (0.85-1.24)        | 1.03 (0.85-1.24)        |
|                                                        | <b>Items</b>                        |      |                                       |                         |                         |                         |
|                                                        | Lonely (yes vs. no)                 | 4570 | 6.5                                   | 1.41 (1.24-1.59)        | 1.09 (0.96-1.25)        | 1.08 (0.95-1.24)        |
|                                                        | Able to confide (never vs. usually) | 3849 | 7.6                                   | 1.35 (1.20-1.53)        | 1.15 (1.01-1.30)        | 1.13 (0.99-1.28)        |
| <b>Overall</b>                                         |                                     |      |                                       |                         |                         |                         |
| Composites of incident myocardial infarction or stroke | <b>Loneliness (yes vs. no)</b>      | 1487 | 14.5                                  | 1.64 (1.43-1.87)        | 1.39 (1.21-1.59)        | 1.37 (1.19-1.57)        |
|                                                        | <b>Items</b>                        |      |                                       |                         |                         |                         |
|                                                        | Lonely (yes vs. no)                 | 4570 | 11.6                                  | 1.43 (1.31-1.57)        | 1.23 (1.12-1.36)        | 1.21 (1.10-1.34)        |
|                                                        | Able to confide (never vs. usually) | 3849 | 12.6                                  | 1.29 (1.17-1.42)        | 1.18 (1.07-1.31)        | 1.17 (1.06-1.29)        |
| Incident myocardial infarction                         | <b>Loneliness (yes vs. no)</b>      | 1487 | 9.3                                   | 1.60 (1.36-1.89)        | 1.34 (1.13-1.59)        | 1.33 (1.12-1.57)        |
|                                                        | <b>Items</b>                        |      |                                       |                         |                         |                         |
|                                                        | Lonely (yes vs. no)                 | 4570 | 7.4                                   | 1.41 (1.25-1.58)        | 1.20 (1.06-1.35)        | 1.18 (1.04-1.33)        |



|                                                         |                                     |      |      |                  |                  |                  |
|---------------------------------------------------------|-------------------------------------|------|------|------------------|------------------|------------------|
|                                                         | Able to confide (never vs. usually) | 3849 | 8.3  | 1.30 (1.16-1.46) | 1.19 (1.06-1.35) | 1.18 (1.05-1.33) |
| Incident stroke                                         | <b>Loneliness (yes vs. no)</b>      | 1487 | 5.6  | 1.59 (1.28-1.96) | 1.35 (1.09-1.68) | 1.34 (1.07-1.66) |
|                                                         | <b>Items</b>                        |      |      |                  |                  |                  |
|                                                         | Lonely (yes vs. no)                 | 4570 | 4.7  | 1.44 (1.24-1.67) | 1.26 (1.07-1.47) | 1.23 (1.05-1.44) |
|                                                         | Able to confide (never vs. usually) | 3849 | 4.8  | 1.26 (1.09-1.47) | 1.16 (0.99-1.35) | 1.14 (0.98-1.34) |
| <hr/>                                                   |                                     |      |      |                  |                  |                  |
| <b>Fatal events</b>                                     |                                     |      |      |                  |                  |                  |
| Composites of fatal myocardial infarction or stroke     | <b>Loneliness (yes vs. no)</b>      | 1487 | 1.1  | 1.77 (1.11-2.83) | 1.27 (0.78-2.06) | 1.27 (0.78-2.07) |
|                                                         | <b>Items</b>                        |      |      |                  |                  |                  |
|                                                         | Lonely (yes vs. no)                 | 4570 | 0.9  | 1.67 (1.20-2.34) | 1.32 (0.92-1.89) | 1.29 (0.90-1.84) |
|                                                         | Able to confide (never vs. usually) | 3849 | 1.1  | 1.62 (1.16-2.25) | 1.33 (0.95-1.87) | 1.31 (0.93-1.84) |
| Fatal myocardial infarction                             | <b>Loneliness (yes vs. no)</b>      | 1487 | 1.0  | 1.93 (1.16-3.22) | 1.36 (0.80-2.32) | 1.38 (0.81-2.34) |
|                                                         | <b>Items</b>                        |      |      |                  |                  |                  |
|                                                         | Lonely (yes vs. no)                 | 4570 | 0.7  | 1.78 (1.22-2.58) | 1.38 (0.93-2.07) | 1.35 (0.90-2.02) |
|                                                         | Able to confide (never vs. usually) | 3849 | 0.9  | 1.84 (1.28-2.64) | 1.50 (1.03-2.18) | 1.48 (1.02-2.16) |
| Fatal stroke                                            | <b>Loneliness (yes vs. no)</b>      | 1487 | 0.2  | 1.18 (0.36-3.87) | 0.91 (0.27-3.06) | 0.88 (0.26-2.95) |
|                                                         | <b>Items</b>                        |      |      |                  |                  |                  |
|                                                         | Lonely (yes vs. no)                 | 4570 | 0.2  | 1.29 (0.60-2.75) | 1.07 (0.48-2.39) | 1.03 (0.46-2.32) |
|                                                         | Able to confide (never vs. usually) | 3849 | 0.2  | 0.91 (0.40-2.07) | 0.77 (0.33-1.79) | 0.74 (0.32-1.72) |
| <hr/>                                                   |                                     |      |      |                  |                  |                  |
| <b>Non-fatal events</b>                                 |                                     |      |      |                  |                  |                  |
| Composites of non-fatal myocardial infarction or stroke | <b>Loneliness (yes vs. no)</b>      | 1487 | 13.3 | 1.62 (1.41-1.86) | 1.39 (1.20-1.60) | 1.37 (1.19-1.58) |

|                                 |                                     |      |      |                  |                  |                  |
|---------------------------------|-------------------------------------|------|------|------------------|------------------|------------------|
|                                 | <b>Items</b>                        |      |      |                  |                  |                  |
|                                 | Lonely (yes vs. no)                 | 4570 | 10.7 | 1.41 (1.28-1.55) | 1.22 (1.10-1.36) | 1.20 (1.08-1.34) |
|                                 | Able to confide (never vs. usually) | 3849 | 11.5 | 1.27 (1.14-1.40) | 1.17 (1.06-1.30) | 1.16 (1.05-1.29) |
| Non-fatal myocardial infarction | <b>Loneliness (yes vs. no)</b>      | 1487 | 8.3  | 1.57 (1.32-1.87) | 1.33 (1.11-1.59) | 1.32 (1.10-1.57) |
|                                 | <b>Items</b>                        |      |      |                  |                  |                  |
|                                 | Lonely (yes vs. no)                 | 4570 | 6.7  | 1.37 (1.21-1.55) | 1.18 (1.03-1.34) | 1.16 (1.02-1.32) |
|                                 | Able to confide (never vs. usually) | 3849 | 7.4  | 1.25 (1.11-1.42) | 1.16 (1.02-1.32) | 1.15 (1.01-1.31) |
| Non-fatal stroke                | <b>Loneliness (yes vs. no)</b>      | 1487 | 5.4  | 1.60 (1.29-1.99) | 1.38 (1.11-1.72) | 1.36 (1.09-1.70) |
|                                 | <b>Items</b>                        |      |      |                  |                  |                  |
|                                 | Lonely (yes vs. no)                 | 4570 | 4.5  | 1.45 (1.25-1.68) | 1.27 (1.08-1.48) | 1.24 (1.06-1.46) |
|                                 | Able to confide (never vs. usually) | 3849 | 4.7  | 1.28 (1.10-1.50) | 1.18 (1.01-1.38) | 1.17 (0.99-1.37) |

\*Model 1 adjusted for age and sex;

†Model 2 additionally adjusted for ethnicity, assessment centre, current employment status, education level, Townsend Deprivation Index, smoking status, alcohol consumption status, physical activity (MET Score), TV watching time, healthy diet score, sleep duration, ever seeking help from physicians due to anxiety or depressive symptoms, obesity status, grip strength, systolic blood pressure, diastolic blood pressure, hyperlipidaemia, and social isolation/loneliness;

‡Model 3 additionally adjusted for estimated glomerular filtration rate, family history of diabetes, HbA1c, diabetes duration, diabetes medication use, chronic kidney disease, diabetes-related microvascular disease, neurodegenerative disease, respiratory disease, digestive disease, rheumatoid arthritis, and osteoarthritis.

CI, confidence interval; CVD, cardiovascular disease; HR, hazard ratio; MET, metabolic equivalent of task.

**eTable 6. Sensitivity analyses of joint associations of social isolation and loneliness with subsequent risk of mortality, myocardial infarction, and stroke in patients with type 2 diabetes mellitus**

| Outcomes                    | Exposures                   | N             | Incident rate (per 1000 person-years) | Model 1*         | Model 2†         | Model 3‡         |
|-----------------------------|-----------------------------|---------------|---------------------------------------|------------------|------------------|------------------|
|                             |                             |               |                                       | HR (95% CI)      | HR (95% CI)      | HR (95% CI)      |
| <b>Mortality</b>            |                             |               |                                       |                  |                  |                  |
| All-cause mortality         | No loneliness               |               |                                       |                  |                  |                  |
|                             | Least social isolation      | 7108          | 10.3                                  | 1.00 [Reference] | 1.00 [Reference] | 1.00 [Reference] |
|                             | Moderately social isolation | 7522          | 12.1                                  | 1.27 (1.16-1.38) | 1.18 (1.08-1.29) | 1.16 (1.06-1.27) |
|                             | Most social isolation       | 3243          | 15.0                                  | 1.67 (1.50-1.85) | 1.36 (1.22-1.52) | 1.33 (1.19-1.48) |
|                             | Loneliness                  |               |                                       |                  |                  |                  |
|                             | Least social isolation      | 301           | 9.8                                   | 1.15 (0.83-1.61) | 1.02 (0.73-1.43) | 1.02 (0.73-1.42) |
|                             | Moderately social isolation | 625           | 13.1                                  | 1.56 (1.27-1.92) | 1.17 (0.95-1.45) | 1.16 (0.94-1.43) |
|                             | Most social isolation       | 561           | 17.7                                  | 1.99 (1.64-2.41) | 1.35 (1.11-1.65) | 1.32 (1.08-1.61) |
|                             | CVD mortality               | No loneliness |                                       |                  |                  |                  |
| Least social isolation      |                             | 7108          | 4.8                                   | 1.00 [Reference] | 1.00 [Reference] | 1.00 [Reference] |
| Moderately social isolation |                             | 7522          | 6.0                                   | 1.37 (1.21-1.56) | 1.25 (1.10-1.42) | 1.22 (1.07-1.39) |
| Most social isolation       |                             | 3243          | 7.4                                   | 1.79 (1.54-2.09) | 1.40 (1.20-1.64) | 1.36 (1.16-1.59) |
| Loneliness                  |                             |               |                                       |                  |                  |                  |
| Least social isolation      |                             | 301           | 4.4                                   | 1.12 (0.68-1.84) | 0.98 (0.60-1.62) | 0.97 (0.59-1.60) |
| Moderately social isolation |                             | 625           | 6.8                                   | 1.75 (1.31-2.34) | 1.28 (0.95-1.72) | 1.25 (0.93-1.69) |
| Most social isolation       |                             | 561           | 9.3                                   | 2.26 (1.72-2.95) | 1.47 (1.12-1.94) | 1.44 (1.09-1.90) |

**Overall**

|                                                        |                                |               |      |  |                  |                  |                  |
|--------------------------------------------------------|--------------------------------|---------------|------|--|------------------|------------------|------------------|
| Composites of incident myocardial infarction or stroke | No loneliness                  |               |      |  |                  |                  |                  |
|                                                        | Least social isolation         | 7108          | 9.5  |  | 1.00 [Reference] | 1.00 [Reference] | 1.00 [Reference] |
|                                                        | Moderately social isolation    | 7522          | 9.8  |  | 1.10 (1.00-1.21) | 1.03 (0.93-1.13) | 1.02 (0.92-1.12) |
|                                                        | Most social isolation          | 3243          | 10.3 |  | 1.20 (1.06-1.36) | 1.02 (0.90-1.16) | 1.01 (0.89-1.14) |
|                                                        | Loneliness                     |               |      |  |                  |                  |                  |
|                                                        | Least social isolation         | 301           | 13.6 |  | 1.70 (1.27-2.28) | 1.52 (1.13-2.04) | 1.51 (1.12-2.02) |
|                                                        | Moderately social isolation    | 625           | 13.9 |  | 1.72 (1.40-2.12) | 1.40 (1.13-1.73) | 1.36 (1.10-1.68) |
|                                                        | Most social isolation          | 561           | 15.7 |  | 1.84 (1.49-2.28) | 1.38 (1.11-1.71) | 1.35 (1.08-1.68) |
|                                                        | Incident myocardial infarction | No loneliness |      |  |                  |                  |                  |
| Least social isolation                                 |                                | 7108          | 6.2  |  | 1.00 [Reference] | 1.00 [Reference] | 1.00 [Reference] |
| Moderately social isolation                            |                                | 7522          | 6.3  |  | 1.09 (0.97-1.23) | 1.02 (0.90-1.15) | 1.01 (0.89-1.13) |
| Most social isolation                                  |                                | 3243          | 6.8  |  | 1.21 (1.04-1.41) | 1.04 (0.89-1.21) | 1.02 (0.88-1.19) |
| Loneliness                                             |                                |               |      |  |                  |                  |                  |
| Least social isolation                                 |                                | 301           | 9.7  |  | 1.85 (1.30-2.61) | 1.64 (1.16-2.33) | 1.63 (1.15-2.31) |
| Moderately social isolation                            |                                | 625           | 8.2  |  | 1.55 (1.19-2.03) | 1.25 (0.95-1.64) | 1.22 (0.93-1.60) |
| Most social isolation                                  |                                | 561           | 10.4 |  | 1.84 (1.42-2.39) | 1.35 (1.04-1.76) | 1.32 (1.01-1.72) |
| Incident stroke                                        |                                | No loneliness |      |  |                  |                  |                  |
|                                                        | Least social isolation         | 7108          | 3.7  |  | 1.00 [Reference] | 1.00 [Reference] | 1.00 [Reference] |
|                                                        | Moderately social isolation    | 7522          | 4.0  |  | 1.14 (0.98-1.33) | 1.06 (0.91-1.24) | 1.05 (0.90-1.23) |
|                                                        | Most social isolation          | 3243          | 4.0  |  | 1.21 (1.00-1.47) | 1.01 (0.83-1.24) | 0.99 (0.81-1.21) |
|                                                        | Loneliness                     |               |      |  |                  |                  |                  |
|                                                        | Least social isolation         | 301           | 5.0  |  | 1.57 (0.98-2.53) | 1.41 (0.87-2.27) | 1.37 (0.85-2.21) |

|                                                     |                             |               |     |                  |                  |                  |
|-----------------------------------------------------|-----------------------------|---------------|-----|------------------|------------------|------------------|
|                                                     | Moderately social isolation | 625           | 5.8 | 1.85 (1.34-2.54) | 1.50 (1.08-2.07) | 1.46 (1.05-2.02) |
|                                                     | Most social isolation       | 561           | 5.6 | 1.70 (1.21-2.41) | 1.28 (0.90-1.83) | 1.26 (0.88-1.80) |
| <hr/>                                               |                             |               |     |                  |                  |                  |
| <b>Fatal events</b>                                 |                             |               |     |                  |                  |                  |
| Composites of fatal myocardial infarction or stroke | No loneliness               |               |     |                  |                  |                  |
|                                                     | Least social isolation      | 7108          | 0.5 | 1.00 [Reference] | 1.00 [Reference] | 1.00 [Reference] |
|                                                     | Moderately social isolation | 7522          | 0.7 | 1.54 (1.05-2.27) | 1.40 (0.95-2.06) | 1.38 (0.93-2.04) |
|                                                     | Most social isolation       | 3243          | 1.1 | 2.45 (1.60-3.75) | 1.92 (1.23-2.99) | 1.89 (1.21-2.96) |
|                                                     | Loneliness                  |               |     |                  |                  |                  |
|                                                     | Least social isolation      | 301           | 0.8 | 1.96 (0.61-6.32) | 1.76 (0.54-5.71) | 1.66 (0.51-5.38) |
|                                                     | Moderately social isolation | 625           | 0.8 | 1.90 (0.81-4.48) | 1.45 (0.61-3.45) | 1.45 (0.61-3.45) |
|                                                     | Most social isolation       | 561           | 1.7 | 3.72 (1.91-7.22) | 2.55 (1.28-5.07) | 2.54 (1.28-5.08) |
|                                                     | Fatal myocardial infarction | No loneliness |     |                  |                  |                  |
| Least social isolation                              |                             | 7108          | 0.4 | 1.00 [Reference] | 1.00 [Reference] | 1.00 [Reference] |
| Moderately social isolation                         |                             | 7522          | 0.5 | 1.47 (0.95-2.28) | 1.34 (0.86-2.09) | 1.34 (0.86-2.08) |
| Most social isolation                               |                             | 3243          | 0.9 | 2.51 (1.56-4.04) | 1.99 (1.21-3.27) | 1.96 (1.19-3.23) |
| Loneliness                                          |                             |               |     |                  |                  |                  |
| Least social isolation                              |                             | 301           | 0.8 | 2.48 (0.76-8.08) | 2.25 (0.69-7.38) | 2.15 (0.65-7.04) |
| Moderately social isolation                         |                             | 625           | 0.5 | 1.61 (0.57-4.53) | 1.24 (0.43-3.53) | 1.25 (0.44-3.58) |
| Most social isolation                               |                             | 561           | 1.5 | 4.27 (2.10-8.66) | 2.90 (1.39-6.06) | 2.92 (1.39-6.10) |
| Fatal stroke                                        |                             | No loneliness |     |                  |                  |                  |
|                                                     | Least social isolation      | 7108          | 0.1 | 1.00 [Reference] | 1.00 [Reference] | 1.00 [Reference] |

|                                                         |                                 |               |      |                   |                   |                   |
|---------------------------------------------------------|---------------------------------|---------------|------|-------------------|-------------------|-------------------|
|                                                         | Moderately social isolation     | 7522          | 0.2  | 1.93 (0.86-4.34)  | 1.65 (0.73-3.73)  | 1.63 (0.72-3.69)  |
|                                                         | Most social isolation           | 3243          | 0.2  | 2.25 (0.87-5.85)  | 1.59 (0.59-4.29)  | 1.60 (0.59-4.34)  |
|                                                         | Loneliness                      |               |      |                   |                   |                   |
|                                                         | Least social isolation          | 301           | 0.0  | 0.00 (0.00-Inf)   | 0.00 (0.00-Inf)   | 0.00 (0.00-Inf)   |
|                                                         | Moderately social isolation     | 625           | 0.3  | 3.06 (0.66-14.24) | 2.27 (0.47-10.89) | 2.13 (0.44-10.28) |
|                                                         | Most social isolation           | 561           | 0.2  | 1.64 (0.21-12.95) | 1.14 (0.14-9.29)  | 1.14 (0.14-9.37)  |
| -----                                                   |                                 |               |      |                   |                   |                   |
| <b>Non-fatal events</b>                                 |                                 |               |      |                   |                   |                   |
| Composites of non-fatal myocardial infarction or stroke | No loneliness                   |               |      |                   |                   |                   |
|                                                         | Least social isolation          | 7108          | 9.0  | 1.00 [Reference]  | 1.00 [Reference]  | 1.00 [Reference]  |
|                                                         | Moderately social isolation     | 7522          | 9.1  | 1.08 (0.98-1.19)  | 1.01 (0.91-1.12)  | 1.00 (0.90-1.11)  |
|                                                         | Most social isolation           | 3243          | 9.2  | 1.13 (1.00-1.29)  | 0.97 (0.85-1.10)  | 0.95 (0.83-1.09)  |
|                                                         | Loneliness                      |               |      |                   |                   |                   |
|                                                         | Least social isolation          | 301           | 12.7 | 1.68 (1.24-2.27)  | 1.50 (1.11-2.04)  | 1.49 (1.10-2.02)  |
|                                                         | Moderately social isolation     | 625           | 13.0 | 1.70 (1.37-2.12)  | 1.39 (1.12-1.73)  | 1.35 (1.08-1.68)  |
|                                                         | Most social isolation           | 561           | 13.9 | 1.72 (1.38-2.16)  | 1.30 (1.03-1.63)  | 1.27 (1.01-1.60)  |
|                                                         | Non-fatal myocardial infarction | No loneliness |      |                   |                   |                   |
| Least social isolation                                  |                                 | 7108          | 5.8  | 1.00 [Reference]  | 1.00 [Reference]  | 1.00 [Reference]  |
| Moderately social isolation                             |                                 | 7522          | 5.8  | 1.06 (0.94-1.20)  | 0.99 (0.88-1.13)  | 0.98 (0.87-1.12)  |
| Most social isolation                                   |                                 | 3243          | 5.9  | 1.12 (0.96-1.32)  | 0.97 (0.82-1.14)  | 0.96 (0.81-1.13)  |
| Loneliness                                              |                                 |               |      |                   |                   |                   |
| Least social isolation                                  |                                 | 301           | 8.8  | 1.80 (1.25-2.58)  | 1.60 (1.11-2.30)  | 1.59 (1.11-2.30)  |
| Moderately social isolation                             |                                 | 625           | 7.7  | 1.54 (1.17-2.04)  | 1.25 (0.94-1.66)  | 1.22 (0.92-1.62)  |

|                  |                             |      |     |                  |                  |                  |
|------------------|-----------------------------|------|-----|------------------|------------------|------------------|
| Non-fatal stroke | Most social isolation       | 561  | 8.8 | 1.66 (1.26-2.20) | 1.23 (0.93-1.64) | 1.20 (0.90-1.60) |
|                  | No loneliness               |      |     |                  |                  |                  |
|                  | Least social isolation      | 7108 | 3.6 | 1.00 [Reference] | 1.00 [Reference] | 1.00 [Reference] |
|                  | Moderately social isolation | 7522 | 3.8 | 1.12 (0.96-1.31) | 1.04 (0.89-1.22) | 1.03 (0.88-1.21) |
|                  | Most social isolation       | 3243 | 3.8 | 1.18 (0.97-1.44) | 0.99 (0.81-1.21) | 0.97 (0.79-1.19) |
|                  | Loneliness                  |      |     |                  |                  |                  |
|                  | Least social isolation      | 301  | 5.0 | 1.62 (1.01-2.60) | 1.45 (0.90-2.34) | 1.42 (0.88-2.29) |
|                  | Moderately social isolation | 625  | 5.5 | 1.81 (1.31-2.51) | 1.47 (1.06-2.06) | 1.44 (1.03-2.00) |
|                  | Most social isolation       | 561  | 5.5 | 1.71 (1.20-2.42) | 1.29 (0.90-1.85) | 1.27 (0.88-1.81) |

\*Model 1 adjusted for age and sex;

†Model 2 additionally adjusted for ethnicity, assessment centre, current employment status, education level, Townsend Deprivation Index, smoking status, alcohol consumption status, physical activity (MET Score), TV watching time, healthy diet score, sleep duration, ever seeking help from physicians due to anxiety or depressive symptoms, obesity status, grip strength, systolic blood pressure, diastolic blood pressure, and hyperlipidaemia;

‡Model 3 additionally adjusted for estimated glomerular filtration rate, family history of diabetes, HbA1c, diabetes duration, diabetes medication use, chronic kidney disease, diabetes-related microvascular disease, neurodegenerative disease, respiratory disease, digestive disease, rheumatoid arthritis, and osteoarthritis.

CI, confidence interval; CVD, cardiovascular disease; HR, hazard ratio; MET, metabolic equivalent of task.

**eTable 7. Sensitivity analyses of associations of social isolation and its items with subsequent risk for mortality, myocardial infarction, and stroke in sample with complete cases**

| Outcomes                                               | Exposures                  | N    | Incident rate (per 1000 person-years) | Model 1*<br>HR (95% CI) | Model 2†<br>HR (95% CI) | Model 3‡<br>HR (95% CI) |
|--------------------------------------------------------|----------------------------|------|---------------------------------------|-------------------------|-------------------------|-------------------------|
| <b>Mortality</b>                                       |                            |      |                                       |                         |                         |                         |
| All-cause mortality                                    | <b>Social isolation</b>    |      |                                       |                         |                         |                         |
|                                                        | Moderately vs. least       | 4674 | 12.6                                  | 1.35 (1.20-1.50)        | 1.27 (1.13-1.42)        | 1.25 (1.12-1.40)        |
|                                                        | Most vs. least             | 2145 | 14.3                                  | 1.59 (1.39-1.81)        | 1.34 (1.17-1.54)        | 1.33 (1.16-1.53)        |
|                                                        | <b>Items</b>               |      |                                       |                         |                         |                         |
|                                                        | Contacts (little vs. more) | 5424 | 12.7                                  | 1.24 (1.12-1.36)        | 1.14 (1.03-1.26)        | 1.13 (1.02-1.25)        |
|                                                        | Live alone (yes vs. no)    | 2657 | 15.7                                  | 1.52 (1.37-1.69)        | 1.32 (1.18-1.48)        | 1.33 (1.19-1.49)        |
| CVD mortality                                          | <b>Social isolation</b>    |      |                                       |                         |                         |                         |
|                                                        | Moderately vs. least       | 4674 | 6.1                                   | 1.40 (1.19-1.65)        | 1.30 (1.10-1.53)        | 1.28 (1.09-1.51)        |
|                                                        | Most vs. least             | 2145 | 6.8                                   | 1.62 (1.34-1.96)        | 1.31 (1.07-1.60)        | 1.30 (1.06-1.60)        |
|                                                        | <b>Items</b>               |      |                                       |                         |                         |                         |
|                                                        | Contacts (little vs. more) | 5424 | 6.2                                   | 1.28 (1.11-1.48)        | 1.15 (1.00-1.33)        | 1.14 (0.98-1.32)        |
|                                                        | Live alone (yes vs. no)    | 2657 | 7.4                                   | 1.52 (1.30-1.77)        | 1.31 (1.12-1.54)        | 1.33 (1.13-1.56)        |
| <b>Overall</b>                                         |                            |      |                                       |                         |                         |                         |
| Composites of incident myocardial infarction or stroke | <b>Social isolation</b>    |      |                                       |                         |                         |                         |
|                                                        | Moderately vs. least       | 4674 | 10.3                                  | 1.13 (1.00-1.28)        | 1.05 (0.93-1.18)        | 1.03 (0.92-1.17)        |
|                                                        | Most vs. least             | 2145 | 11.0                                  | 1.23 (1.07-1.43)        | 1.01 (0.86-1.17)        | 0.99 (0.85-1.16)        |



|                                                     |                            |      |      |                  |                  |                  |
|-----------------------------------------------------|----------------------------|------|------|------------------|------------------|------------------|
|                                                     | <b>Items</b>               |      |      |                  |                  |                  |
|                                                     | Contacts (little vs. more) | 5424 | 10.4 | 1.11 (0.99-1.23) | 1.00 (0.90-1.12) | 0.99 (0.89-1.11) |
|                                                     | Live alone (yes vs. no)    | 2657 | 11.3 | 1.18 (1.04-1.33) | 1.02 (0.90-1.17) | 1.02 (0.89-1.16) |
| Incident myocardial infarction                      | <b>Social isolation</b>    |      |      |                  |                  |                  |
|                                                     | Moderately vs. least       | 4674 | 7.0  | 1.21 (1.04-1.40) | 1.12 (0.97-1.30) | 1.11 (0.96-1.29) |
|                                                     | Most vs. least             | 2145 | 7.4  | 1.30 (1.08-1.56) | 1.08 (0.89-1.30) | 1.07 (0.88-1.29) |
|                                                     | <b>Items</b>               |      |      |                  |                  |                  |
|                                                     | Contacts (little vs. more) | 5424 | 7.2  | 1.18 (1.04-1.35) | 1.08 (0.95-1.24) | 1.08 (0.94-1.23) |
|                                                     | Live alone (yes vs. no)    | 2657 | 7.2  | 1.13 (0.97-1.32) | 0.99 (0.84-1.16) | 0.98 (0.83-1.15) |
| Incident stroke                                     | <b>Social isolation</b>    |      |      |                  |                  |                  |
|                                                     | Moderately vs. least       | 4674 | 3.9  | 1.04 (0.86-1.25) | 0.95 (0.79-1.16) | 0.94 (0.78-1.14) |
|                                                     | Most vs. least             | 2145 | 4.2  | 1.13 (0.89-1.43) | 0.91 (0.71-1.17) | 0.90 (0.70-1.15) |
|                                                     | <b>Items</b>               |      |      |                  |                  |                  |
|                                                     | Contacts (little vs. more) | 5424 | 3.9  | 0.99 (0.84-1.18) | 0.89 (0.75-1.06) | 0.88 (0.74-1.04) |
|                                                     | Live alone (yes vs. no)    | 2657 | 4.6  | 1.23 (1.02-1.49) | 1.09 (0.89-1.33) | 1.08 (0.88-1.32) |
| <hr/>                                               |                            |      |      |                  |                  |                  |
|                                                     | <b>Fatal events</b>        |      |      |                  |                  |                  |
| Composites of fatal myocardial infarction or stroke | <b>Social isolation</b>    |      |      |                  |                  |                  |
|                                                     | Moderately vs. least       | 4674 | 0.7  | 1.42 (0.87-2.32) | 1.38 (0.84-2.27) | 1.36 (0.83-2.24) |
|                                                     | Most vs. least             | 2145 | 0.9  | 1.92 (1.09-3.36) | 1.71 (0.95-3.08) | 1.71 (0.95-3.08) |
|                                                     | <b>Items</b>               |      |      |                  |                  |                  |
|                                                     | Contacts (little vs. more) | 5424 | 0.7  | 1.26 (0.83-1.93) | 1.19 (0.77-1.83) | 1.19 (0.77-1.84) |

|                                                         |                            |      |      |                  |                  |                  |
|---------------------------------------------------------|----------------------------|------|------|------------------|------------------|------------------|
|                                                         | Live alone (yes vs. no)    | 2657 | 0.9  | 1.72 (1.10-2.70) | 1.58 (0.98-2.55) | 1.54 (0.95-2.50) |
| Fatal myocardial infarction                             | <b>Social isolation</b>    |      |      |                  |                  |                  |
|                                                         | Moderately vs. least       | 4674 | 0.5  | 1.48 (0.84-2.60) | 1.44 (0.82-2.55) | 1.43 (0.81-2.53) |
|                                                         | Most vs. least             | 2145 | 0.7  | 2.20 (1.18-4.10) | 1.98 (1.03-3.80) | 1.99 (1.03-3.82) |
|                                                         | <b>Items</b>               |      |      |                  |                  |                  |
|                                                         | Contacts (little vs. more) | 5424 | 0.6  | 1.28 (0.80-2.06) | 1.20 (0.74-1.95) | 1.21 (0.74-1.97) |
| Fatal stroke                                            | Live alone (yes vs. no)    | 2657 | 0.8  | 1.93 (1.18-3.18) | 1.80 (1.06-3.05) | 1.77 (1.04-3.01) |
|                                                         | <b>Social isolation</b>    |      |      |                  |                  |                  |
|                                                         | Moderately vs. least       | 4674 | 0.1  | 1.23 (0.45-3.41) | 1.20 (0.43-3.36) | 1.19 (0.42-3.39) |
|                                                         | Most vs. least             | 2145 | 0.1  | 1.06 (0.27-4.10) | 0.89 (0.22-3.66) | 0.93 (0.22-3.98) |
|                                                         | <b>Items</b>               |      |      |                  |                  |                  |
|                                                         | Contacts (little vs. more) | 5424 | 0.1  | 1.19 (0.47-3.01) | 1.12 (0.43-2.90) | 1.22 (0.46-3.23) |
|                                                         | Live alone (yes vs. no)    | 2657 | 0.1  | 1.04 (0.34-3.18) | 0.89 (0.28-2.85) | 0.82 (0.25-2.72) |
| <hr/>                                                   |                            |      |      |                  |                  |                  |
| <b>Non-fatal events</b>                                 |                            |      |      |                  |                  |                  |
| Composites of non-fatal myocardial infarction or stroke | <b>Social isolation</b>    |      |      |                  |                  |                  |
|                                                         | Moderately vs. least       | 4674 | 9.7  | 1.12 (0.99-1.26) | 1.03 (0.91-1.16) | 1.02 (0.90-1.15) |
|                                                         | Most vs. least             | 2145 | 10.1 | 1.19 (1.02-1.39) | 0.97 (0.82-1.14) | 0.96 (0.81-1.12) |
|                                                         | <b>Items</b>               |      |      |                  |                  |                  |
|                                                         | Contacts (little vs. more) | 5424 | 9.8  | 1.10 (0.98-1.23) | 1.00 (0.89-1.12) | 0.99 (0.89-1.11) |
|                                                         | Live alone (yes vs. no)    | 2657 | 10.4 | 1.14 (1.00-1.30) | 0.99 (0.87-1.13) | 0.98 (0.86-1.13) |
| Non-fatal myocardial infarction                         | <b>Social isolation</b>    |      |      |                  |                  |                  |

|                  |                            |      |     |                  |                  |                  |
|------------------|----------------------------|------|-----|------------------|------------------|------------------|
|                  | Moderately vs. least       | 4674 | 6.5 | 1.19 (1.02-1.39) | 1.10 (0.94-1.29) | 1.09 (0.94-1.28) |
|                  | Most vs. least             | 2145 | 6.6 | 1.24 (1.02-1.50) | 1.02 (0.84-1.24) | 1.01 (0.83-1.23) |
|                  | <b>Items</b>               |      |     |                  |                  |                  |
|                  | Contacts (little vs. more) | 5424 | 6.6 | 1.18 (1.03-1.35) | 1.07 (0.93-1.23) | 1.07 (0.93-1.23) |
|                  | Live alone (yes vs. no)    | 2657 | 6.4 | 1.08 (0.92-1.27) | 0.94 (0.79-1.11) | 0.93 (0.78-1.10) |
| Non-fatal stroke | <b>Social isolation</b>    |      |     |                  |                  |                  |
|                  | Moderately vs. least       | 4674 | 3.8 | 1.03 (0.85-1.25) | 0.95 (0.78-1.15) | 0.94 (0.77-1.14) |
|                  | Most vs. least             | 2145 | 4.1 | 1.13 (0.89-1.43) | 0.91 (0.71-1.17) | 0.89 (0.70-1.15) |
|                  | <b>Items</b>               |      |     |                  |                  |                  |
|                  | Contacts (little vs. more) | 5424 | 3.7 | 0.99 (0.83-1.17) | 0.88 (0.74-1.05) | 0.87 (0.73-1.04) |
|                  | Live alone (yes vs. no)    | 2657 | 4.5 | 1.24 (1.02-1.51) | 1.09 (0.89-1.34) | 1.09 (0.89-1.34) |

\*Model 1 adjusted for age and sex;

†Model 2 additionally adjusted for ethnicity, assessment centre, current employment status, education level, Townsend Deprivation Index, smoking status, alcohol consumption status, physical activity (MET Score), TV watching time, healthy diet score, sleep duration, ever seeking help from physicians due to anxiety or depressive symptoms, obesity status, grip strength, systolic blood pressure, diastolic blood pressure, hyperlipidaemia, and social isolation/loneliness;

‡Model 3 additionally adjusted for estimated glomerular filtration rate, family history of diabetes, HbA1c, diabetes duration, diabetes medication use, chronic kidney disease, diabetes-related microvascular disease, neurodegenerative disease, respiratory disease, digestive disease, rheumatoid arthritis, and osteoarthritis.

CI, confidence interval; CVD, cardiovascular disease; HR, hazard ratio; MET, metabolic equivalent of task.

**eTable 8. Sensitivity analyses of associations of loneliness and its items with subsequent risk for mortality, myocardial infarction, and stroke in sample with complete cases**

| Outcomes                                               | Exposures                           | N    | Incident rate (per 1000 person-years) | Model 1*<br>HR (95% CI) | Model 2†<br>HR (95% CI) | Model 3‡<br>HR (95% CI) |
|--------------------------------------------------------|-------------------------------------|------|---------------------------------------|-------------------------|-------------------------|-------------------------|
| <b>Mortality</b>                                       |                                     |      |                                       |                         |                         |                         |
| All-cause mortality                                    | <b>Loneliness (yes vs. no)</b>      | 848  | 12.7                                  | 1.19 (0.99-1.42)        | 0.91 (0.76-1.10)        | 0.91 (0.76-1.10)        |
|                                                        | <b>Items</b>                        |      |                                       |                         |                         |                         |
|                                                        | Lonely (yes vs. no)                 | 2516 | 11.9                                  | 1.21 (1.08-1.36)        | 0.99 (0.87-1.12)        | 0.98 (0.86-1.11)        |
|                                                        | Able to confide (never vs. usually) | 2180 | 13.7                                  | 1.16 (1.03-1.30)        | 1.01 (0.89-1.14)        | 1.00 (0.89-1.13)        |
| CVD mortality                                          | <b>Loneliness (yes vs. no)</b>      | 848  | 6.0                                   | 1.17 (0.90-1.52)        | 0.90 (0.69-1.18)        | 0.92 (0.70-1.20)        |
|                                                        | <b>Items</b>                        |      |                                       |                         |                         |                         |
|                                                        | Lonely (yes vs. no)                 | 2516 | 5.5                                   | 1.19 (1.00-1.41)        | 0.98 (0.81-1.17)        | 0.97 (0.80-1.16)        |
|                                                        | Able to confide (never vs. usually) | 2180 | 7.1                                   | 1.27 (1.07-1.50)        | 1.11 (0.93-1.31)        | 1.09 (0.92-1.30)        |
| <b>Overall</b>                                         |                                     |      |                                       |                         |                         |                         |
| Composites of incident myocardial infarction or stroke | <b>Loneliness (yes vs. no)</b>      | 848  | 14.5                                  | 1.60 (1.34-1.91)        | 1.36 (1.13-1.63)        | 1.34 (1.12-1.61)        |
|                                                        | <b>Items</b>                        |      |                                       |                         |                         |                         |
|                                                        | Lonely (yes vs. no)                 | 2516 | 11.7                                  | 1.41 (1.25-1.60)        | 1.24 (1.09-1.42)        | 1.22 (1.07-1.39)        |
|                                                        | Able to confide (never vs. usually) | 2180 | 12.9                                  | 1.31 (1.16-1.49)        | 1.20 (1.06-1.37)        | 1.19 (1.05-1.35)        |
| Incident myocardial infarction                         | <b>Loneliness (yes vs. no)</b>      | 848  | 8.8                                   | 1.44 (1.15-1.80)        | 1.20 (0.96-1.51)        | 1.19 (0.94-1.50)        |
|                                                        | <b>Items</b>                        |      |                                       |                         |                         |                         |
|                                                        | Lonely (yes vs. no)                 | 2516 | 7.6                                   | 1.38 (1.18-1.61)        | 1.18 (1.00-1.39)        | 1.16 (0.98-1.36)        |

|                                                     |                                     |      |     |                  |                  |                  |
|-----------------------------------------------------|-------------------------------------|------|-----|------------------|------------------|------------------|
|                                                     | Able to confide (never vs. usually) | 2180 | 8.4 | 1.27 (1.08-1.48) | 1.16 (0.99-1.36) | 1.14 (0.98-1.34) |
| Incident stroke                                     | <b>Loneliness (yes vs. no)</b>      | 848  | 6.0 | 1.69 (1.29-2.21) | 1.45 (1.10-1.91) | 1.42 (1.08-1.88) |
|                                                     | <b>Items</b>                        |      |     |                  |                  |                  |
|                                                     | Lonely (yes vs. no)                 | 2516 | 4.7 | 1.42 (1.16-1.72) | 1.29 (1.04-1.58) | 1.25 (1.02-1.54) |
|                                                     | Able to confide (never vs. usually) | 2180 | 5.1 | 1.34 (1.10-1.63) | 1.23 (1.00-1.50) | 1.21 (0.99-1.49) |
| <hr/>                                               |                                     |      |     |                  |                  |                  |
| <b>Fatal events</b>                                 |                                     |      |     |                  |                  |                  |
| Composites of fatal myocardial infarction or stroke | <b>Loneliness (yes vs. no)</b>      | 848  | 0.7 | 1.20 (0.55-2.61) | 0.95 (0.43-2.09) | 0.93 (0.42-2.05) |
|                                                     | <b>Items</b>                        |      |     |                  |                  |                  |
|                                                     | Lonely (yes vs. no)                 | 2516 | 0.6 | 1.26 (0.75-2.10) | 1.06 (0.61-1.84) | 1.02 (0.59-1.77) |
|                                                     | Able to confide (never vs. usually) | 2180 | 0.9 | 1.42 (0.88-2.29) | 1.28 (0.78-2.08) | 1.26 (0.77-2.06) |
| Fatal myocardial infarction                         | <b>Loneliness (yes vs. no)</b>      | 848  | 0.6 | 1.31 (0.56-3.03) | 0.99 (0.42-2.34) | 0.99 (0.42-2.35) |
|                                                     | <b>Items</b>                        |      |     |                  |                  |                  |
|                                                     | Lonely (yes vs. no)                 | 2516 | 0.5 | 1.36 (0.77-2.39) | 1.11 (0.61-2.04) | 1.08 (0.59-1.99) |
|                                                     | Able to confide (never vs. usually) | 2180 | 0.8 | 1.62 (0.96-2.72) | 1.42 (0.83-2.42) | 1.43 (0.84-2.45) |
| Fatal stroke                                        | <b>Loneliness (yes vs. no)</b>      | 848  | 0.1 | 0.81 (0.11-6.13) | 0.74 (0.09-5.79) | 0.62 (0.08-5.00) |
|                                                     | <b>Items</b>                        |      |     |                  |                  |                  |
|                                                     | Lonely (yes vs. no)                 | 2516 | 0.1 | 0.90 (0.26-3.14) | 0.83 (0.22-3.17) | 0.73 (0.19-2.82) |
|                                                     | Able to confide (never vs. usually) | 2180 | 0.1 | 0.79 (0.23-2.74) | 0.77 (0.22-2.76) | 0.72 (0.20-2.63) |
| <hr/>                                               |                                     |      |     |                  |                  |                  |
| <b>Non-fatal events</b>                             |                                     |      |     |                  |                  |                  |

|                                                         |                                     |      |      |                  |                  |                  |
|---------------------------------------------------------|-------------------------------------|------|------|------------------|------------------|------------------|
| Composites of non-fatal myocardial infarction or stroke | <b>Loneliness (yes vs. no)</b>      | 848  | 13.8 | 1.62 (1.35-1.94) | 1.38 (1.15-1.67) | 1.36 (1.13-1.65) |
|                                                         | <b>Items</b>                        |      |      |                  |                  |                  |
|                                                         | Lonely (yes vs. no)                 | 2516 | 11.1 | 1.42 (1.25-1.61) | 1.25 (1.09-1.44) | 1.23 (1.07-1.41) |
|                                                         | Able to confide (never vs. usually) | 2180 | 12.0 | 1.30 (1.14-1.48) | 1.19 (1.04-1.36) | 1.18 (1.03-1.35) |
| Non-fatal myocardial infarction                         | <b>Loneliness (yes vs. no)</b>      | 848  | 8.2  | 1.45 (1.15-1.83) | 1.22 (0.96-1.55) | 1.20 (0.95-1.52) |
|                                                         | <b>Items</b>                        |      |      |                  |                  |                  |
|                                                         | Lonely (yes vs. no)                 | 2516 | 7.0  | 1.38 (1.18-1.62) | 1.19 (1.00-1.40) | 1.16 (0.98-1.38) |
|                                                         | Able to confide (never vs. usually) | 2180 | 7.6  | 1.24 (1.05-1.45) | 1.13 (0.96-1.34) | 1.12 (0.95-1.32) |
| Non-fatal stroke                                        | <b>Loneliness (yes vs. no)</b>      | 848  | 5.9  | 1.72 (1.31-2.26) | 1.48 (1.12-1.96) | 1.46 (1.10-1.93) |
|                                                         | <b>Items</b>                        |      |      |                  |                  |                  |
|                                                         | Lonely (yes vs. no)                 | 2516 | 4.6  | 1.43 (1.18-1.75) | 1.30 (1.06-1.61) | 1.27 (1.03-1.57) |
|                                                         | Able to confide (never vs. usually) | 2180 | 5.0  | 1.36 (1.11-1.66) | 1.25 (1.02-1.53) | 1.23 (1.01-1.52) |

\*Model 1 adjusted for age and sex;

†Model 2 additionally adjusted for ethnicity, assessment centre, current employment status, education level, Townsend Deprivation Index, smoking status, alcohol consumption status, physical activity (MET Score), TV watching time, healthy diet score, sleep duration, ever seeking help from physicians due to anxiety or depressive symptoms, obesity status, grip strength, systolic blood pressure, diastolic blood pressure, hyperlipidaemia, and social isolation/loneliness;

‡Model 3 additionally adjusted for estimated glomerular filtration rate, family history of diabetes, HbA1c, diabetes duration, diabetes medication use, chronic kidney disease, diabetes-related microvascular disease, neurodegenerative disease, respiratory disease, digestive disease, rheumatoid arthritis, and osteoarthritis.

CI, confidence interval; CVD, cardiovascular disease; HR, hazard ratio; MET, metabolic equivalent of task.

**eTable 9. Sensitivity analyses of associations of social isolation and its items with subsequent risk for mortality, myocardial infarction, and stroke in sample with imputed data on exposures**

| Outcomes                                               | Exposures                  | N*     | Incident rate (per 1000 person-years) | Model 1†<br>HR (95% CI) | Model 2‡<br>HR (95% CI) | Model 3§<br>HR (95% CI) |
|--------------------------------------------------------|----------------------------|--------|---------------------------------------|-------------------------|-------------------------|-------------------------|
| <b>Mortality</b>                                       |                            |        |                                       |                         |                         |                         |
| All-cause mortality                                    | <b>Social isolation</b>    |        |                                       |                         |                         |                         |
|                                                        | Moderately vs. least       | 8984   | 12.1                                  | 1.29 (1.18-1.40)        | 1.17 (1.08-1.28)        | 1.16 (1.07-1.27)        |
|                                                        | Most vs. least             | 4242   | 15.2                                  | 1.71 (1.56-1.89)        | 1.36 (1.23-1.50)        | 1.33 (1.20-1.47)        |
|                                                        | <b>Items</b>               |        |                                       |                         |                         |                         |
|                                                        | Contacts (little vs. more) | 10,681 | 12.8                                  | 1.26 (1.18-1.36)        | 1.14 (1.06-1.22)        | 1.11 (1.03-1.20)        |
|                                                        | Live alone (yes vs. no)    | 5026   | 16.2                                  | 1.55 (1.43-1.67)        | 1.28 (1.18-1.39)        | 1.28 (1.18-1.39)        |
| CVD mortality                                          | <b>Social isolation</b>    |        |                                       |                         |                         |                         |
|                                                        | Moderately vs. least       | 8984   | 6.1                                   | 1.41 (1.25-1.59)        | 1.26 (1.11-1.42)        | 1.24 (1.09-1.40)        |
|                                                        | Most vs. least             | 4242   | 7.7                                   | 1.90 (1.66-2.18)        | 1.44 (1.24-1.66)        | 1.40 (1.21-1.62)        |
|                                                        | <b>Items</b>               |        |                                       |                         |                         |                         |
|                                                        | Contacts (little vs. more) | 10,681 | 6.5                                   | 1.37 (1.24-1.52)        | 1.19 (1.07-1.33)        | 1.16 (1.05-1.29)        |
|                                                        | Live alone (yes vs. no)    | 5026   | 8.2                                   | 1.64 (1.47-1.83)        | 1.34 (1.19-1.51)        | 1.35 (1.21-1.52)        |
| <b>Overall</b>                                         |                            |        |                                       |                         |                         |                         |
| Composites of incident myocardial infarction or stroke | <b>Social isolation</b>    |        |                                       |                         |                         |                         |
|                                                        | Moderately vs. least       | 8984   | 10.1                                  | 1.11 (1.02-1.22)        | 1.02 (0.93-1.12)        | 1.01 (0.92-1.11)        |
|                                                        | Most vs. least             | 4242   | 11.0                                  | 1.26 (1.13-1.40)        | 1.01 (0.90-1.13)        | 1.00 (0.89-1.12)        |

|                                                     |                            |        |      |                  |                  |                  |
|-----------------------------------------------------|----------------------------|--------|------|------------------|------------------|------------------|
|                                                     | <b>Items</b>               |        |      |                  |                  |                  |
|                                                     | Contacts (little vs. more) | 10,681 | 10.3 | 1.10 (1.02-1.19) | 0.99 (0.92-1.08) | 0.98 (0.91-1.07) |
|                                                     | Live alone (yes vs. no)    | 5026   | 11.4 | 1.21 (1.10-1.32) | 1.04 (0.94-1.14) | 1.04 (0.94-1.14) |
| Incident myocardial infarction                      | <b>Social isolation</b>    |        |      |                  |                  |                  |
|                                                     | Moderately vs. least       | 8984   | 6.5  | 1.08 (0.97-1.21) | 0.99 (0.89-1.11) | 0.98 (0.88-1.10) |
|                                                     | Most vs. least             | 4242   | 7.2  | 1.24 (1.09-1.42) | 1.01 (0.88-1.16) | 1.00 (0.87-1.15) |
|                                                     | <b>Items</b>               |        |      |                  |                  |                  |
|                                                     | Contacts (little vs. more) | 10,681 | 6.7  | 1.09 (0.99-1.20) | 0.98 (0.89-1.08) | 0.97 (0.88-1.07) |
|                                                     | Live alone (yes vs. no)    | 5026   | 7.3  | 1.18 (1.05-1.32) | 1.03 (0.92-1.16) | 1.03 (0.91-1.16) |
| Incident stroke                                     | <b>Social isolation</b>    |        |      |                  |                  |                  |
|                                                     | Moderately vs. least       | 8984   | 4.1  | 1.17 (1.02-1.35) | 1.07 (0.93-1.24) | 1.06 (0.92-1.23) |
|                                                     | Most vs. least             | 4242   | 4.3  | 1.29 (1.09-1.53) | 1.02 (0.86-1.23) | 1.01 (0.84-1.21) |
|                                                     | <b>Items</b>               |        |      |                  |                  |                  |
|                                                     | Contacts (little vs. more) | 10,681 | 4.1  | 1.12 (0.99-1.27) | 1.01 (0.89-1.15) | 1.00 (0.88-1.14) |
|                                                     | Live alone (yes vs. no)    | 5026   | 4.7  | 1.25 (1.09-1.44) | 1.05 (0.91-1.22) | 1.05 (0.91-1.22) |
| <hr/>                                               |                            |        |      |                  |                  |                  |
| <b>Fatal events</b>                                 |                            |        |      |                  |                  |                  |
| Composites of fatal myocardial infarction or stroke | <b>Social isolation</b>    |        |      |                  |                  |                  |
|                                                     | Moderately vs. least       | 8984   | 0.7  | 1.47 (1.02-2.11) | 1.29 (0.89-1.86) | 1.28 (0.89-1.85) |
|                                                     | Most vs. least             | 4242   | 1.2  | 2.54 (1.74-3.71) | 1.88 (1.25-2.81) | 1.86 (1.24-2.79) |
|                                                     | <b>Items</b>               |        |      |                  |                  |                  |



|                                                         |                            |        |      |                  |                  |                  |
|---------------------------------------------------------|----------------------------|--------|------|------------------|------------------|------------------|
|                                                         | Contacts (little vs. more) | 10,681 | 0.9  | 1.61 (1.19-2.17) | 1.37 (1.01-1.86) | 1.36 (1.00-1.85) |
|                                                         | Live alone (yes vs. no)    | 5026   | 1.1  | 1.98 (1.47-2.67) | 1.59 (1.15-2.19) | 1.58 (1.15-2.19) |
| Fatal myocardial infarction                             | <b>Social isolation</b>    |        |      |                  |                  |                  |
|                                                         | Moderately vs. least       | 8984   | 0.5  | 1.32 (0.87-1.99) | 1.16 (0.76-1.76) | 1.16 (0.76-1.76) |
|                                                         | Most vs. least             | 4242   | 0.9  | 2.45 (1.61-3.74) | 1.81 (1.16-2.84) | 1.79 (1.14-2.82) |
|                                                         | <b>Items</b>               |        |      |                  |                  |                  |
|                                                         | Contacts (little vs. more) | 10,681 | 0.7  | 1.50 (1.07-2.10) | 1.27 (0.90-1.80) | 1.26 (0.89-1.79) |
|                                                         | Live alone (yes vs. no)    | 5026   | 0.9  | 2.04 (1.45-2.85) | 1.65 (1.15-2.37) | 1.65 (1.14-2.37) |
| Fatal stroke                                            | <b>Social isolation</b>    |        |      |                  |                  |                  |
|                                                         | Moderately vs. least       | 8984   | 0.2  | 2.28 (1.04-4.99) | 1.95 (0.88-4.30) | 1.92 (0.87-4.24) |
|                                                         | Most vs. least             | 4242   | 0.2  | 2.95 (1.24-7.02) | 2.10 (0.85-5.23) | 2.12 (0.85-5.28) |
|                                                         | <b>Items</b>               |        |      |                  |                  |                  |
|                                                         | Contacts (little vs. more) | 10,681 | 0.2  | 1.96 (1.04-3.69) | 1.66 (0.87-3.17) | 1.63 (0.85-3.13) |
|                                                         | Live alone (yes vs. no)    | 5026   | 0.3  | 1.94 (1.03-3.65) | 1.48 (0.75-2.91) | 1.51 (0.76-2.97) |
| <hr/>                                                   |                            |        |      |                  |                  |                  |
| <b>Non-fatal events</b>                                 |                            |        |      |                  |                  |                  |
| Composites of non-fatal myocardial infarction or stroke | <b>Social isolation</b>    |        |      |                  |                  |                  |
|                                                         | Moderately vs. least       | 8984   | 9.4  | 1.10 (1.00-1.20) | 1.01 (0.92-1.11) | 1.00 (0.91-1.10) |
|                                                         | Most vs. least             | 4242   | 9.8  | 1.18 (1.06-1.33) | 0.96 (0.85-1.08) | 0.95 (0.84-1.07) |
|                                                         | <b>Items</b>               |        |      |                  |                  |                  |
|                                                         | Contacts (little vs. more) | 10,681 | 9.4  | 1.07 (0.99-1.17) | 0.97 (0.89-1.06) | 0.96 (0.88-1.05) |
|                                                         | Live alone (yes vs. no)    | 5026   | 10.2 | 1.15 (1.05-1.26) | 1.00 (0.90-1.10) | 0.99 (0.90-1.10) |

|                                 |                            |        |     |                  |                  |                  |
|---------------------------------|----------------------------|--------|-----|------------------|------------------|------------------|
| Non-fatal myocardial infarction | <b>Social isolation</b>    |        |     |                  |                  |                  |
|                                 | Moderately vs. least       | 8984   | 6.0 | 1.06 (0.95-1.19) | 0.98 (0.87-1.10) | 0.97 (0.86-1.09) |
|                                 | Most vs. least             | 4242   | 6.3 | 1.16 (1.00-1.33) | 0.95 (0.82-1.10) | 0.94 (0.81-1.09) |
|                                 | <b>Items</b>               |        |     |                  |                  |                  |
|                                 | Contacts (little vs. more) | 10,681 | 6.0 | 1.06 (0.95-1.17) | 0.96 (0.86-1.06) | 0.95 (0.85-1.05) |
|                                 | Live alone (yes vs. no)    | 5026   | 6.3 | 1.11 (0.99-1.25) | 0.98 (0.87-1.11) | 0.98 (0.86-1.11) |
| Non-fatal stroke                | <b>Social isolation</b>    |        |     |                  |                  |                  |
|                                 | Moderately vs. least       | 8984   | 3.9 | 1.15 (0.99-1.32) | 1.05 (0.91-1.21) | 1.04 (0.90-1.20) |
|                                 | Most vs. least             | 4242   | 4.1 | 1.25 (1.05-1.49) | 0.99 (0.83-1.19) | 0.98 (0.81-1.18) |
|                                 | <b>Items</b>               |        |     |                  |                  |                  |
|                                 | Contacts (little vs. more) | 10,681 | 3.9 | 1.10 (0.97-1.25) | 0.99 (0.87-1.13) | 0.98 (0.86-1.12) |
|                                 | Live alone (yes vs. no)    | 5026   | 4.4 | 1.23 (1.06-1.42) | 1.03 (0.89-1.20) | 1.04 (0.89-1.20) |

\*Included the participants with responses of either “prefer not to answer” or “do not know”, which were regarded as missing data and multiply imputed.

†Model 1 adjusted for age and sex;

‡Model 2 additionally adjusted for ethnicity, assessment centre, current employment status, education level, Townsend Deprivation Index, smoking status, alcohol consumption status, physical activity (MET Score), TV watching time, healthy diet score, sleep duration, ever seeking help from physicians due to anxiety or depressive symptoms, obesity status, grip strength, systolic blood pressure, diastolic blood pressure, hyperlipidaemia, and social isolation/loneliness;

§Model 3 additionally adjusted for estimated glomerular filtration rate, family history of diabetes, HbA1c, diabetes duration, diabetes medication use, chronic kidney disease, diabetes-related microvascular disease, neurodegenerative disease, respiratory disease, digestive disease, rheumatoid arthritis, and osteoarthritis.

CI, confidence interval; CVD, cardiovascular disease; HR, hazard ratio; MET, metabolic equivalent of task.

**eTable 10. Sensitivity analyses of associations of loneliness and its items with subsequent risk for mortality, myocardial infarction, and stroke in sample with imputed data on exposures**

| Outcomes                                               | Exposures                           | N*   | Incident rate (per 1000 person-years) | Model 1†<br>HR (95% CI) | Model 2‡<br>HR (95% CI) | Model 3§<br>HR (95% CI) |
|--------------------------------------------------------|-------------------------------------|------|---------------------------------------|-------------------------|-------------------------|-------------------------|
| <b>Mortality</b>                                       |                                     |      |                                       |                         |                         |                         |
| All-cause mortality                                    | <b>Loneliness (yes vs. no)</b>      | 1648 | 14.1                                  | 1.37 (1.20-1.55)        | 1.01 (0.89-1.15)        | 1.01 (0.89-1.15)        |
|                                                        | <b>Items</b>                        |      |                                       |                         |                         |                         |
|                                                        | Lonely (yes vs. no)                 | 5075 | 13.3                                  | 1.40 (1.29-1.53)        | 1.12 (1.02-1.22)        | 1.11 (1.02-1.21)        |
| CVD mortality                                          | Able to confide (never vs. usually) | 4268 | 14.7                                  | 1.27 (1.17-1.39)        | 1.09 (0.99-1.19)        | 1.07 (0.98-1.17)        |
|                                                        | <b>Loneliness (yes vs. no)</b>      | 1648 | 7.1                                   | 1.43 (1.20-1.72)        | 1.03 (0.86-1.25)        | 1.04 (0.86-1.25)        |
|                                                        | <b>Items</b>                        |      |                                       |                         |                         |                         |
|                                                        | Lonely (yes vs. no)                 | 5075 | 6.5                                   | 1.42 (1.26-1.60)        | 1.10 (0.97-1.25)        | 1.09 (0.96-1.24)        |
|                                                        | Able to confide (never vs. usually) | 4268 | 7.5                                   | 1.35 (1.20-1.52)        | 1.13 (1.00-1.27)        | 1.11 (0.99-1.26)        |
| <b>Overall</b>                                         |                                     |      |                                       |                         |                         |                         |
| Composites of incident myocardial infarction or stroke | <b>Loneliness (yes vs. no)</b>      | 1648 | 14.3                                  | 1.60 (1.41-1.83)        | 1.35 (1.18-1.55)        | 1.34 (1.17-1.53)        |
|                                                        | <b>Items</b>                        |      |                                       |                         |                         |                         |
|                                                        | Lonely (yes vs. no)                 | 5075 | 11.5                                  | 1.42 (1.30-1.56)        | 1.22 (1.11-1.35)        | 1.21 (1.09-1.33)        |
| Incident myocardial infarction                         | Able to confide (never vs. usually) | 4268 | 12.4                                  | 1.27 (1.16-1.40)        | 1.17 (1.06-1.28)        | 1.16 (1.05-1.27)        |
|                                                        | <b>Loneliness (yes vs. no)</b>      | 1648 | 9.2                                   | 1.56 (1.32-1.83)        | 1.31 (1.10-1.55)        | 1.29 (1.09-1.53)        |
|                                                        | <b>Items</b>                        |      |                                       |                         |                         |                         |
|                                                        | Lonely (yes vs. no)                 | 5075 | 7.4                                   | 1.40 (1.25-1.56)        | 1.19 (1.06-1.34)        | 1.18 (1.04-1.32)        |
|                                                        | Able to confide (never vs. usually) | 4268 | 8.2                                   | 1.28 (1.14-1.43)        | 1.17 (1.04-1.32)        | 1.16 (1.03-1.31)        |
| Incident stroke                                        | <b>Loneliness (yes vs. no)</b>      | 1648 | 5.6                                   | 1.60 (1.31-1.97)        | 1.35 (1.09-1.67)        | 1.33 (1.08-1.65)        |
|                                                        | <b>Items</b>                        |      |                                       |                         |                         |                         |
|                                                        | Lonely (yes vs. no)                 | 5075 | 4.7                                   | 1.45 (1.26-1.67)        | 1.25 (1.08-1.46)        | 1.23 (1.06-1.43)        |

|                                                         |                                     |      |      |                  |                  |                  |
|---------------------------------------------------------|-------------------------------------|------|------|------------------|------------------|------------------|
|                                                         | Able to confide (never vs. usually) | 4268 | 4.8  | 1.28 (1.11-1.48) | 1.16 (1.00-1.35) | 1.15 (0.99-1.33) |
| <b>Fatal events</b>                                     |                                     |      |      |                  |                  |                  |
| Composites of fatal myocardial infarction or stroke     | <b>Loneliness (yes vs. no)</b>      | 1648 | 1.2  | 1.70 (1.07-2.69) | 1.20 (0.74-1.94) | 1.19 (0.74-1.93) |
|                                                         | <b>Items</b>                        |      |      |                  |                  |                  |
|                                                         | Lonely (yes vs. no)                 | 5075 | 1.0  | 1.64 (1.19-2.27) | 1.26 (0.89-1.79) | 1.23 (0.87-1.75) |
|                                                         | Able to confide (never vs. usually) | 4268 | 1.1  | 1.51 (1.09-2.10) | 1.23 (0.88-1.72) | 1.20 (0.86-1.69) |
| Fatal myocardial infarction                             | <b>Loneliness (yes vs. no)</b>      | 1648 | 0.9  | 1.79 (1.07-2.97) | 1.30 (0.77-2.20) | 1.30 (0.77-2.20) |
|                                                         | <b>Items</b>                        |      |      |                  |                  |                  |
|                                                         | Lonely (yes vs. no)                 | 5075 | 0.7  | 1.67 (1.16-2.41) | 1.32 (0.89-1.95) | 1.29 (0.87-1.91) |
|                                                         | Able to confide (never vs. usually) | 4268 | 0.9  | 1.71 (1.19-2.46) | 1.41 (0.97-2.05) | 1.38 (0.95-2.01) |
| Fatal Stroke                                            | <b>Loneliness (yes vs. no)</b>      | 1648 | 0.3  | 1.34 (0.43-4.15) | 0.88 (0.27-2.84) | 0.86 (0.27-2.77) |
|                                                         | <b>Items</b>                        |      |      |                  |                  |                  |
|                                                         | Lonely (yes vs. no)                 | 5075 | 0.2  | 1.50 (0.74-3.05) | 1.07 (0.50-2.29) | 1.04 (0.49-2.23) |
|                                                         | Able to confide (never vs. usually) | 4268 | 0.2  | 0.88 (0.40-1.97) | 0.69 (0.30-1.56) | 0.65 (0.29-1.49) |
| <b>Non-fatal events</b>                                 |                                     |      |      |                  |                  |                  |
| Composites of non-fatal myocardial infarction or stroke | <b>Loneliness (yes vs. no)</b>      | 1648 | 13.1 | 1.59 (1.38-1.82) | 1.36 (1.18-1.56) | 1.34 (1.17-1.55) |
|                                                         | <b>Items</b>                        |      |      |                  |                  |                  |
|                                                         | Lonely (yes vs. no)                 | 5075 | 10.5 | 1.40 (1.27-1.54) | 1.22 (1.10-1.34) | 1.20 (1.08-1.33) |
|                                                         | Able to confide (never vs. usually) | 4268 | 11.3 | 1.26 (1.14-1.38) | 1.16 (1.05-1.28) | 1.15 (1.04-1.27) |
| Non-fatal myocardial infarction                         | <b>Loneliness (yes vs. no)</b>      | 1648 | 8.2  | 1.53 (1.29-1.82) | 1.30 (1.09-1.56) | 1.29 (1.08-1.54) |
|                                                         | <b>Items</b>                        |      |      |                  |                  |                  |

|                  |                                     |      |     |                  |                  |                  |
|------------------|-------------------------------------|------|-----|------------------|------------------|------------------|
|                  | Lonely (yes vs. no)                 | 5075 | 6.6 | 1.37 (1.22-1.54) | 1.18 (1.04-1.34) | 1.16 (1.03-1.32) |
|                  | Able to confide (never vs. usually) | 4268 | 7.3 | 1.24 (1.09-1.40) | 1.15 (1.01-1.30) | 1.14 (1.00-1.29) |
| Non-fatal stroke | <b>Loneliness (yes vs. no)</b>      | 1648 | 5.4 | 1.61 (1.31-1.99) | 1.38 (1.11-1.71) | 1.36 (1.10-1.69) |
|                  | <b>Items</b>                        |      |     |                  |                  |                  |
|                  | Lonely (yes vs. no)                 | 5075 | 4.5 | 1.45 (1.26-1.68) | 1.26 (1.08-1.47) | 1.24 (1.07-1.45) |
|                  | Able to confide (never vs. usually) | 4268 | 4.7 | 1.30 (1.12-1.51) | 1.19 (1.02-1.39) | 1.18 (1.01-1.37) |

\*Included the participants with responses of either “prefer not to answer” or “do not know”, which were regarded as missing data and multiply imputed.

†Model 1 adjusted for age and sex;

‡Model 2 additionally adjusted for ethnicity, assessment centre, current employment status, education level, Townsend Deprivation Index, smoking status, alcohol consumption status, physical activity (MET Score), TV watching time, healthy diet score, sleep duration, ever seeking help from physicians due to anxiety or depressive symptoms, obesity status, grip strength, systolic blood pressure, diastolic blood pressure, hyperlipidaemia, and social isolation/loneliness;

§Model 3 additionally adjusted for estimated glomerular filtration rate, family history of diabetes, HbA1c, diabetes duration, diabetes medication use, chronic kidney disease, diabetes-related microvascular disease, neurodegenerative disease, respiratory disease, digestive disease, rheumatoid arthritis, and osteoarthritis.

CI, confidence interval; CVD, cardiovascular disease; HR, hazard ratio; MET, metabolic equivalent of task.

**eTable 11. Sensitivity analyses of associations of social isolation and its items with subsequent risk for mortality, myocardial infarction, and stroke after excluding events occurring within the first two years**

| Outcomes                                               | Exposures                  | N    | Incident rate (per 1000 person-years) | Model 1*<br>HR (95% CI) | Model 2†<br>HR (95% CI) | Model 3‡<br>HR (95% CI) |
|--------------------------------------------------------|----------------------------|------|---------------------------------------|-------------------------|-------------------------|-------------------------|
| <b>Mortality</b>                                       |                            |      |                                       |                         |                         |                         |
| All-cause mortality                                    | <b>Social isolation</b>    |      |                                       |                         |                         |                         |
|                                                        | Moderately vs. least       | 8083 | 11.5                                  | 1.28 (1.17-1.39)        | 1.18 (1.08-1.29)        | 1.16 (1.06-1.27)        |
|                                                        | Most vs. least             | 3769 | 14.6                                  | 1.71 (1.55-1.89)        | 1.37 (1.23-1.53)        | 1.34 (1.20-1.49)        |
|                                                        | <b>Items</b>               |      |                                       |                         |                         |                         |
|                                                        | Contacts (little vs. more) | 9529 | 12.3                                  | 1.26 (1.17-1.36)        | 1.14 (1.06-1.24)        | 1.12 (1.03-1.21)        |
| CVD mortality                                          | <b>Social isolation</b>    |      |                                       |                         |                         |                         |
|                                                        | Moderately vs. least       | 8083 | 5.8                                   | 1.38 (1.22-1.57)        | 1.25 (1.10-1.42)        | 1.22 (1.07-1.39)        |
|                                                        | Most vs. least             | 3769 | 7.4                                   | 1.87 (1.62-2.16)        | 1.44 (1.23-1.68)        | 1.39 (1.19-1.62)        |
|                                                        | <b>Items</b>               |      |                                       |                         |                         |                         |
|                                                        | Contacts (little vs. more) | 9529 | 6.2                                   | 1.35 (1.21-1.51)        | 1.19 (1.06-1.33)        | 1.15 (1.03-1.29)        |
|                                                        | Live alone (yes vs. no)    | 4548 | 7.8                                   | 1.63 (1.45-1.83)        | 1.36 (1.20-1.53)        | 1.37 (1.21-1.55)        |
| <b>Overall</b>                                         |                            |      |                                       |                         |                         |                         |
| Composites of incident myocardial infarction or stroke | <b>Social isolation</b>    |      |                                       |                         |                         |                         |
|                                                        | Moderately vs. least       | 8013 | 9.3                                   | 1.12 (1.01-1.23)        | 1.02 (0.92-1.13)        | 1.01 (0.91-1.11)        |
|                                                        | Most vs. least             | 3736 | 10.1                                  | 1.25 (1.11-1.41)        | 1.01 (0.89-1.14)        | 0.99 (0.88-1.12)        |
|                                                        | <b>Items</b>               |      |                                       |                         |                         |                         |
|                                                        | Contacts (little vs. more) | 9445 | 9.3                                   | 1.09 (1.00-1.19)        | 0.98 (0.89-1.07)        | 0.96 (0.88-1.05)        |

|                                                     |                            |                            |      |                  |                  |                  |
|-----------------------------------------------------|----------------------------|----------------------------|------|------------------|------------------|------------------|
| Incident myocardial infarction                      | Live alone (yes vs. no)    | 4505                       | 10·5 | 1·21 (1·10-1·34) | 1·05 (0·94-1·16) | 1·04 (0·94-1·16) |
|                                                     | <b>Social isolation</b>    |                            |      |                  |                  |                  |
|                                                     | Moderately vs. least       | 8046                       | 6·0  | 1·09 (0·97-1·23) | 1·00 (0·88-1·12) | 0·99 (0·87-1·11) |
|                                                     | Most vs. least             | 3751                       | 6·8  | 1·27 (1·10-1·46) | 1·02 (0·88-1·18) | 1·00 (0·86-1·17) |
|                                                     | <b>Items</b>               |                            |      |                  |                  |                  |
|                                                     | Contacts (little vs. more) | 9483                       | 6·2  | 1·09 (0·98-1·21) | 0·98 (0·88-1·09) | 0·96 (0·87-1·08) |
| Incident stroke                                     | Live alone (yes vs. no)    | 4527                       | 6·8  | 1·19 (1·05-1·34) | 1·03 (0·91-1·17) | 1·02 (0·90-1·16) |
|                                                     | <b>Social isolation</b>    |                            |      |                  |                  |                  |
|                                                     | Moderately vs. least       | 8049                       | 3·7  | 1·17 (1·00-1·36) | 1·07 (0·91-1·25) | 1·06 (0·91-1·24) |
|                                                     | Most vs. least             | 3754                       | 3·8  | 1·24 (1·03-1·50) | 0·99 (0·82-1·21) | 0·98 (0·80-1·20) |
|                                                     | <b>Items</b>               |                            |      |                  |                  |                  |
|                                                     | Contacts (little vs. more) | 9491                       | 3·6  | 1·08 (0·94-1·24) | 0·97 (0·85-1·12) | 0·96 (0·83-1·10) |
| <hr/>                                               |                            |                            |      |                  |                  |                  |
| <b>Fatal events</b>                                 |                            |                            |      |                  |                  |                  |
| Composites of fatal myocardial infarction or stroke | <b>Social isolation</b>    |                            |      |                  |                  |                  |
|                                                     | Moderately vs. least       | 8083                       | 0·7  | 1·47 (1·01-2·16) | 1·32 (0·89-1·94) | 1·30 (0·88-1·92) |
|                                                     | Most vs. least             | 3769                       | 1·0  | 2·27 (1·50-3·45) | 1·71 (1·10-2·66) | 1·70 (1·09-2·64) |
|                                                     | <b>Items</b>               |                            |      |                  |                  |                  |
|                                                     |                            | Contacts (little vs. more) | 9529 | 0·8              | 1·48 (1·08-2·04) | 1·26 (0·91-1·75) |
|                                                     | Live alone (yes vs. no)    | 4548                       | 1·0  | 1·89 (1·36-2·63) | 1·58 (1·11-2·24) | 1·57 (1·10-2·25) |

|                                                         |                            |      |     |                  |                  |                  |
|---------------------------------------------------------|----------------------------|------|-----|------------------|------------------|------------------|
| Fatal myocardial infarction                             | <b>Social isolation</b>    |      |     |                  |                  |                  |
|                                                         | Moderately vs. least       | 8083 | 0·5 | 1·31 (0·85-2·02) | 1·17 (0·75-1·81) | 1·16 (0·75-1·81) |
|                                                         | Most vs. least             | 3769 | 0·8 | 2·34 (1·48-3·70) | 1·73 (1·07-2·82) | 1·71 (1·05-2·79) |
|                                                         | <b>Items</b>               |      |     |                  |                  |                  |
|                                                         | Contacts (little vs. more) | 9529 | 0·6 | 1·42 (0·99-2·04) | 1·21 (0·84-1·75) | 1·19 (0·82-1·73) |
|                                                         | Live alone (yes vs. no)    | 4548 | 0·8 | 2·01 (1·39-2·91) | 1·65 (1·11-2·46) | 1·65 (1·11-2·45) |
| Fatal stroke                                            | <b>Social isolation</b>    |      |     |                  |                  |                  |
|                                                         | Moderately vs. least       | 8083 | 0·2 | 2·35 (1·03-5·37) | 2·07 (0·89-4·77) | 2·03 (0·88-4·70) |
|                                                         | Most vs. least             | 3769 | 0·2 | 1·98 (0·72-5·48) | 1·51 (0·52-4·36) | 1·53 (0·53-4·41) |
|                                                         | <b>Items</b>               |      |     |                  |                  |                  |
|                                                         | Contacts (little vs. more) | 9529 | 0·2 | 1·59 (0·80-3·17) | 1·35 (0·67-2·72) | 1·33 (0·66-2·69) |
|                                                         | Live alone (yes vs. no)    | 4548 | 0·2 | 1·64 (0·80-3·37) | 1·44 (0·67-3·08) | 1·46 (0·68-3·14) |
| <hr/>                                                   |                            |      |     |                  |                  |                  |
| <b>Non-fatal events</b>                                 |                            |      |     |                  |                  |                  |
| Composites of non-fatal myocardial infarction or stroke | <b>Social isolation</b>    |      |     |                  |                  |                  |
|                                                         | Moderately vs. least       | 8013 | 8·6 | 1·10 (0·99-1·21) | 1·00 (0·91-1·11) | 0·99 (0·90-1·10) |
|                                                         | Most vs. least             | 3736 | 9·0 | 1·19 (1·05-1·35) | 0·96 (0·85-1·10) | 0·95 (0·83-1·08) |
|                                                         | <b>Items</b>               |      |     |                  |                  |                  |
|                                                         | Contacts (little vs. more) | 9445 | 8·6 | 1·06 (0·97-1·16) | 0·96 (0·87-1·05) | 0·95 (0·86-1·04) |
|                                                         | Live alone (yes vs. no)    | 4505 | 9·4 | 1·16 (1·05-1·29) | 1·01 (0·90-1·12) | 1·00 (0·90-1·12) |
| Non-fatal myocardial infarction                         | <b>Social isolation</b>    |      |     |                  |                  |                  |



|                  |                            |      |     |                  |                  |                  |
|------------------|----------------------------|------|-----|------------------|------------------|------------------|
|                  | Moderately vs. least       | 8046 | 5·5 | 1·08 (0·95-1·22) | 0·99 (0·87-1·12) | 0·97 (0·86-1·11) |
|                  | Most vs. least             | 3751 | 5·9 | 1·19 (1·02-1·38) | 0·96 (0·82-1·13) | 0·95 (0·81-1·11) |
|                  | <b>Items</b>               |      |     |                  |                  |                  |
|                  | Contacts (little vs. more) | 9483 | 5·6 | 1·07 (0·95-1·19) | 0·96 (0·85-1·07) | 0·95 (0·84-1·06) |
|                  | Live alone (yes vs. no)    | 4527 | 5·9 | 1·12 (0·98-1·27) | 0·98 (0·85-1·12) | 0·97 (0·85-1·11) |
| Non-fatal stroke | <b>Social isolation</b>    |      |     |                  |                  |                  |
|                  | Moderately vs. least       | 8049 | 3·5 | 1·14 (0·97-1·33) | 1·04 (0·89-1·22) | 1·03 (0·88-1·21) |
|                  | Most vs. least             | 3754 | 3·7 | 1·22 (1·01-1·48) | 0·98 (0·80-1·19) | 0·96 (0·79-1·18) |
|                  | <b>Items</b>               |      |     |                  |                  |                  |
|                  | Contacts (little vs. more) | 9491 | 3·5 | 1·06 (0·92-1·22) | 0·96 (0·83-1·10) | 0·95 (0·82-1·09) |
|                  | Live alone (yes vs. no)    | 4525 | 4·1 | 1·25 (1·07-1·46) | 1·06 (0·90-1·25) | 1·07 (0·90-1·26) |

\*Model 1 adjusted for age and sex;

†Model 2 additionally adjusted for ethnicity, assessment centre, current employment status, education level, Townsend Deprivation Index, smoking status, alcohol consumption status, physical activity (MET Score), TV watching time, healthy diet score, sleep duration, ever seeking help from physicians due to anxiety or depressive symptoms, obesity status, grip strength, systolic blood pressure, diastolic blood pressure, hyperlipidaemia, and social isolation/loneliness;

‡Model 3 additionally adjusted for estimated glomerular filtration rate, family history of diabetes, HbA1c, diabetes duration, diabetes medication use, chronic kidney disease, diabetes-related microvascular disease, neurodegenerative disease, respiratory disease, digestive disease, rheumatoid arthritis, and osteoarthritis.

CI, confidence interval; CVD, cardiovascular disease; HR, hazard ratio; MET, metabolic equivalent of task.

**eTable 12. Sensitivity analyses of associations of loneliness and its items with subsequent risk for mortality, myocardial infarction, and stroke after excluding events occurring within the first two years**

| Outcomes                                               | Exposures                           | N    | Incident rate (per 1000 person-years) | Model 1*<br>HR (95% CI) | Model 2†<br>HR (95% CI) | Model 3‡<br>HR (95% CI) |
|--------------------------------------------------------|-------------------------------------|------|---------------------------------------|-------------------------|-------------------------|-------------------------|
| <b>Mortality</b>                                       |                                     |      |                                       |                         |                         |                         |
| All-cause mortality                                    | <b>Loneliness (yes vs. no)</b>      | 1476 | 13.5                                  | 1.36 (1.19-1.55)        | 1.01 (0.88-1.16)        | 1.01 (0.88-1.16)        |
|                                                        | <b>Items</b>                        |      |                                       |                         |                         |                         |
|                                                        | Lonely (yes vs. no)                 | 4533 | 12.7                                  | 1.41 (1.29-1.54)        | 1.12 (1.02-1.24)        | 1.11 (1.01-1.22)        |
|                                                        | Able to confide (never vs. usually) | 3819 | 14.1                                  | 1.29 (1.18-1.40)        | 1.11 (1.01-1.21)        | 1.09 (0.99-1.19)        |
| CVD mortality                                          | <b>Loneliness (yes vs. no)</b>      | 1476 | 6.8                                   | 1.41 (1.16-1.69)        | 1.02 (0.84-1.24)        | 1.02 (0.84-1.24)        |
|                                                        | <b>Items</b>                        |      |                                       |                         |                         |                         |
|                                                        | Lonely (yes vs. no)                 | 4533 | 6.2                                   | 1.42 (1.26-1.61)        | 1.11 (0.97-1.27)        | 1.10 (0.96-1.25)        |
|                                                        | Able to confide (never vs. usually) | 3819 | 7.3                                   | 1.37 (1.21-1.55)        | 1.16 (1.02-1.32)        | 1.14 (1.00-1.29)        |
| <b>Overall</b>                                         |                                     |      |                                       |                         |                         |                         |
| Composites of incident myocardial infarction or stroke | <b>Loneliness (yes vs. no)</b>      | 1456 | 13.1                                  | 1.62 (1.41-1.87)        | 1.37 (1.19-1.59)        | 1.36 (1.17-1.57)        |
|                                                        | <b>Items</b>                        |      |                                       |                         |                         |                         |
|                                                        | Lonely (yes vs. no)                 | 4493 | 10.7                                  | 1.45 (1.32-1.60)        | 1.24 (1.12-1.38)        | 1.23 (1.10-1.36)        |
|                                                        | Able to confide (never vs. usually) | 3773 | 11.4                                  | 1.28 (1.15-1.41)        | 1.17 (1.06-1.30)        | 1.16 (1.05-1.29)        |
| Incident myocardial infarction                         | <b>Loneliness (yes vs. no)</b>      | 1467 | 8.7                                   | 1.62 (1.36-1.92)        | 1.35 (1.13-1.61)        | 1.33 (1.11-1.59)        |
|                                                        | <b>Items</b>                        |      |                                       |                         |                         |                         |
|                                                        | Lonely (yes vs. no)                 | 4509 | 6.9                                   | 1.41 (1.25-1.59)        | 1.19 (1.04-1.35)        | 1.17 (1.03-1.33)        |

|                                                     |                                     |      |     |                  |                  |                  |
|-----------------------------------------------------|-------------------------------------|------|-----|------------------|------------------|------------------|
|                                                     | Able to confide (never vs. usually) | 3797 | 7.7 | 1.31 (1.16-1.48) | 1.20 (1.06-1.36) | 1.19 (1.05-1.35) |
| Incident stroke                                     | <b>Loneliness (yes vs. no)</b>      | 1465 | 4.9 | 1.53 (1.22-1.92) | 1.31 (1.04-1.65) | 1.29 (1.03-1.63) |
|                                                     | <b>Items</b>                        |      |     |                  |                  |                  |
|                                                     | Lonely (yes vs. no)                 | 4516 | 4.3 | 1.48 (1.27-1.73) | 1.29 (1.10-1.52) | 1.27 (1.08-1.50) |
|                                                     | Able to confide (never vs. usually) | 3793 | 4.3 | 1.22 (1.03-1.43) | 1.12 (0.95-1.32) | 1.10 (0.93-1.30) |
| <hr/>                                               |                                     |      |     |                  |                  |                  |
| <b>Fatal events</b>                                 |                                     |      |     |                  |                  |                  |
| Composites of fatal myocardial infarction or stroke | <b>Loneliness (yes vs. no)</b>      | 1476 | 1.0 | 1.76 (1.07-2.87) | 1.27 (0.76-2.12) | 1.28 (0.77-2.13) |
|                                                     | <b>Items</b>                        |      |     |                  |                  |                  |
|                                                     | Lonely (yes vs. no)                 | 4533 | 0.8 | 1.64 (1.16-2.33) | 1.31 (0.90-1.90) | 1.28 (0.87-1.86) |
|                                                     | Able to confide (never vs. usually) | 3819 | 1.0 | 1.60 (1.13-2.26) | 1.34 (0.93-1.91) | 1.31 (0.92-1.88) |
| Fatal myocardial infarction                         | <b>Loneliness (yes vs. no)</b>      | 1476 | 0.8 | 1.87 (1.09-3.21) | 1.31 (0.75-2.30) | 1.33 (0.76-2.33) |
|                                                     | <b>Items</b>                        |      |     |                  |                  |                  |
|                                                     | Lonely (yes vs. no)                 | 4533 | 0.7 | 1.82 (1.24-2.69) | 1.43 (0.94-2.17) | 1.39 (0.92-2.12) |
|                                                     | Able to confide (never vs. usually) | 3819 | 0.8 | 1.76 (1.20-2.59) | 1.45 (0.98-2.16) | 1.44 (0.97-2.14) |
| Fatal stroke                                        | <b>Loneliness (yes vs. no)</b>      | 1476 | 0.2 | 1.32 (0.40-4.32) | 1.09 (0.32-3.69) | 1.08 (0.32-3.65) |
|                                                     | <b>Items</b>                        |      |     |                  |                  |                  |
|                                                     | Lonely (yes vs. no)                 | 4533 | 0.1 | 1.04 (0.45-2.40) | 0.88 (0.36-2.14) | 0.87 (0.36-2.10) |
|                                                     | Able to confide (never vs. usually) | 3819 | 0.2 | 1.02 (0.44-2.35) | 0.91 (0.39-2.14) | 0.88 (0.38-2.06) |
| <hr/>                                               |                                     |      |     |                  |                  |                  |
| <b>Non-fatal events</b>                             |                                     |      |     |                  |                  |                  |

|                                                         |                                     |      |      |                  |                  |                  |
|---------------------------------------------------------|-------------------------------------|------|------|------------------|------------------|------------------|
| Composites of non-fatal myocardial infarction or stroke | <b>Loneliness (yes vs. no)</b>      | 1456 | 12.0 | 1.60 (1.39-1.86) | 1.37 (1.18-1.60) | 1.36 (1.17-1.58) |
|                                                         | <b>Items</b>                        |      |      |                  |                  |                  |
|                                                         | Lonely (yes vs. no)                 | 4493 | 9.9  | 1.43 (1.29-1.59) | 1.23 (1.11-1.38) | 1.22 (1.09-1.36) |
|                                                         | Able to confide (never vs. usually) | 3773 | 10.4 | 1.25 (1.13-1.39) | 1.16 (1.04-1.29) | 1.15 (1.03-1.28) |
| Non-fatal myocardial infarction                         | <b>Loneliness (yes vs. no)</b>      | 1467 | 7.8  | 1.59 (1.33-1.90) | 1.34 (1.11-1.62) | 1.33 (1.10-1.60) |
|                                                         | <b>Items</b>                        |      |      |                  |                  |                  |
|                                                         | Lonely (yes vs. no)                 | 4509 | 6.2  | 1.37 (1.21-1.56) | 1.16 (1.01-1.33) | 1.15 (1.00-1.31) |
|                                                         | Able to confide (never vs. usually) | 3797 | 6.9  | 1.27 (1.11-1.44) | 1.17 (1.03-1.34) | 1.16 (1.02-1.32) |
| Non-fatal stroke                                        | <b>Loneliness (yes vs. no)</b>      | 1465 | 4.7  | 1.54 (1.23-1.94) | 1.32 (1.05-1.68) | 1.31 (1.03-1.66) |
|                                                         | <b>Items</b>                        |      |      |                  |                  |                  |
|                                                         | Lonely (yes vs. no)                 | 4516 | 4.2  | 1.50 (1.28-1.76) | 1.31 (1.11-1.55) | 1.29 (1.09-1.53) |
|                                                         | Able to confide (never vs. usually) | 3793 | 4.1  | 1.22 (1.04-1.44) | 1.13 (0.95-1.33) | 1.11 (0.94-1.32) |

\*Model 1 adjusted for age and sex;

†Model 2 additionally adjusted for ethnicity, assessment centre, current employment status, education level, Townsend Deprivation Index, smoking status, alcohol consumption status, physical activity (MET Score), TV watching time, healthy diet score, sleep duration, ever seeking help from physicians due to anxiety or depressive symptoms, obesity status, grip strength, systolic blood pressure, diastolic blood pressure, hyperlipidaemia, and social isolation/loneliness;

‡Model 3 additionally adjusted for estimated glomerular filtration rate, family history of diabetes, HbA1c, diabetes duration, diabetes medication use, chronic kidney disease, diabetes-related microvascular disease, neurodegenerative disease, respiratory disease, digestive disease, rheumatoid arthritis, and osteoarthritis.

CI, confidence interval; CVD, cardiovascular disease; HR, hazard ratio; MET, metabolic equivalent of task.

**eTable 13. Sensitivity analyses of associations of social isolation and its items with subsequent risk for mortality, myocardial infarction, and stroke in sample by censoring up to Dec 31, 2019 (this date was considered as the start of the COVID-19 pandemic in the UK)**

| Outcomes                                               | Exposures                  | N    | Incident rate (per 1000 person-years) | Model 1*<br>HR (95% CI) | Model 2†<br>HR (95% CI) | Model 3‡<br>HR (95% CI) |
|--------------------------------------------------------|----------------------------|------|---------------------------------------|-------------------------|-------------------------|-------------------------|
| <b>Mortality</b>                                       |                            |      |                                       |                         |                         |                         |
| All-cause mortality                                    | <b>Social isolation</b>    |      |                                       |                         |                         |                         |
|                                                        | Moderately vs. least       | 8147 | 10.1                                  | 1.24 (1.12-1.37)        | 1.14 (1.03-1.27)        | 1.12 (1.01-1.24)        |
|                                                        | Most vs. least             | 3804 | 13.3                                  | 1.71 (1.53-1.92)        | 1.37 (1.21-1.54)        | 1.33 (1.18-1.50)        |
|                                                        | <b>Items</b>               |      |                                       |                         |                         |                         |
|                                                        | Contacts (little vs. more) | 9601 | 10.9                                  | 1.23 (1.13-1.35)        | 1.11 (1.01-1.21)        | 1.08 (0.99-1.18)        |
| CVD mortality                                          | <b>Social isolation</b>    |      |                                       |                         |                         |                         |
|                                                        | Moderately vs. least       | 8147 | 5.0                                   | 1.34 (1.16-1.55)        | 1.21 (1.04-1.40)        | 1.18 (1.01-1.37)        |
|                                                        | Most vs. least             | 3804 | 6.6                                   | 1.87 (1.58-2.20)        | 1.42 (1.20-1.70)        | 1.38 (1.16-1.65)        |
|                                                        | <b>Items</b>               |      |                                       |                         |                         |                         |
|                                                        | Contacts (little vs. more) | 9601 | 5.4                                   | 1.31 (1.15-1.48)        | 1.14 (1.00-1.30)        | 1.10 (0.97-1.25)        |
|                                                        | Live alone (yes vs. no)    | 4602 | 6.9                                   | 1.65 (1.45-1.89)        | 1.37 (1.19-1.58)        | 1.39 (1.21-1.60)        |
| <b>Overall</b>                                         |                            |      |                                       |                         |                         |                         |
| Composites of incident myocardial infarction or stroke | <b>Social isolation</b>    |      |                                       |                         |                         |                         |
|                                                        | Moderately vs. least       | 8147 | 9.8                                   | 1.14 (1.03-1.27)        | 1.05 (0.94-1.16)        | 1.03 (0.93-1.15)        |
|                                                        | Most vs. least             | 3804 | 10.9                                  | 1.31 (1.16-1.48)        | 1.06 (0.93-1.20)        | 1.04 (0.92-1.19)        |

|                                                     |                            |      |      |                  |                  |                  |
|-----------------------------------------------------|----------------------------|------|------|------------------|------------------|------------------|
|                                                     | <b>Items</b>               |      |      |                  |                  |                  |
|                                                     | Contacts (little vs. more) | 9601 | 10.1 | 1.15 (1.05-1.26) | 1.03 (0.94-1.13) | 1.02 (0.93-1.12) |
|                                                     | Live alone (yes vs. no)    | 4602 | 11.0 | 1.22 (1.10-1.35) | 1.05 (0.94-1.17) | 1.05 (0.94-1.17) |
| Incident myocardial infarction                      | <b>Social isolation</b>    |      |      |                  |                  |                  |
|                                                     | Moderately vs. least       | 8147 | 6.3  | 1.10 (0.97-1.24) | 1.01 (0.89-1.14) | 1.00 (0.88-1.13) |
|                                                     | Most vs. least             | 3804 | 7.1  | 1.26 (1.09-1.47) | 1.03 (0.88-1.20) | 1.01 (0.87-1.19) |
|                                                     | <b>Items</b>               |      |      |                  |                  |                  |
|                                                     | Contacts (little vs. more) | 9601 | 6.6  | 1.13 (1.01-1.26) | 1.01 (0.90-1.13) | 1.00 (0.89-1.12) |
|                                                     | Live alone (yes vs. no)    | 4602 | 6.9  | 1.15 (1.01-1.30) | 1.01 (0.88-1.15) | 1.00 (0.88-1.15) |
| Incident stroke                                     | <b>Social isolation</b>    |      |      |                  |                  |                  |
|                                                     | Moderately vs. least       | 8147 | 3.9  | 1.25 (1.06-1.47) | 1.14 (0.97-1.34) | 1.13 (0.96-1.33) |
|                                                     | Most vs. least             | 3804 | 4.2  | 1.40 (1.15-1.71) | 1.13 (0.92-1.39) | 1.11 (0.90-1.37) |
|                                                     | <b>Items</b>               |      |      |                  |                  |                  |
|                                                     | Contacts (little vs. more) | 9601 | 3.9  | 1.17 (1.01-1.35) | 1.05 (0.91-1.22) | 1.04 (0.89-1.20) |
|                                                     | Live alone (yes vs. no)    | 4602 | 4.7  | 1.35 (1.15-1.58) | 1.16 (0.98-1.37) | 1.16 (0.98-1.37) |
| <hr/>                                               |                            |      |      |                  |                  |                  |
| <b>Fatal events</b>                                 |                            |      |      |                  |                  |                  |
| Composites of fatal myocardial infarction or stroke | <b>Social isolation</b>    |      |      |                  |                  |                  |
|                                                     | Moderately vs. least       | 8147 | 0.7  | 1.77 (1.16-2.70) | 1.57 (1.02-2.42) | 1.56 (1.01-2.40) |
|                                                     | Most vs. least             | 3804 | 1.2  | 3.02 (1.93-4.73) | 2.25 (1.40-3.61) | 2.24 (1.39-3.60) |
|                                                     | <b>Items</b>               |      |      |                  |                  |                  |

|                                                         |                            |      |     |                   |                  |                  |
|---------------------------------------------------------|----------------------------|------|-----|-------------------|------------------|------------------|
|                                                         | Contacts (little vs. more) | 9601 | 0.9 | 1.92 (1.36-2.72)  | 1.64 (1.15-2.35) | 1.62 (1.13-2.32) |
|                                                         | Live alone (yes vs. no)    | 4602 | 1.1 | 1.97 (1.39-2.78)  | 1.58 (1.09-2.29) | 1.59 (1.09-2.30) |
| Fatal myocardial infarction                             | <b>Social isolation</b>    |      |     |                   |                  |                  |
|                                                         | Moderately vs. least       | 8147 | 0.5 | 1.60 (1.00-2.56)  | 1.42 (0.88-2.29) | 1.42 (0.88-2.28) |
|                                                         | Most vs. least             | 3804 | 1.0 | 2.94 (1.80-4.80)  | 2.18 (1.30-3.66) | 2.16 (1.28-3.63) |
|                                                         | <b>Items</b>               |      |     |                   |                  |                  |
|                                                         | Contacts (little vs. more) | 9601 | 0.7 | 1.87 (1.27-2.75)  | 1.60 (1.08-2.38) | 1.58 (1.06-2.35) |
|                                                         | Live alone (yes vs. no)    | 4602 | 0.9 | 1.97 (1.34-2.89)  | 1.54 (1.02-2.33) | 1.55 (1.02-2.35) |
| Fatal stroke                                            | <b>Social isolation</b>    |      |     |                   |                  |                  |
|                                                         | Moderately vs. least       | 8147 | 0.2 | 2.92 (1.06-8.03)  | 2.52 (0.91-6.99) | 2.52 (0.91-7.01) |
|                                                         | Most vs. least             | 3804 | 0.2 | 3.48 (1.13-10.65) | 2.53 (0.79-8.08) | 2.62 (0.82-8.39) |
|                                                         | <b>Items</b>               |      |     |                   |                  |                  |
|                                                         | Contacts (little vs. more) | 9601 | 0.2 | 1.96 (0.90-4.25)  | 1.57 (0.71-3.47) | 1.56 (0.70-3.46) |
|                                                         | Live alone (yes vs. no)    | 4602 | 0.2 | 2.18 (1.02-4.67)  | 1.94 (0.86-4.36) | 2.03 (0.90-4.59) |
| <hr/>                                                   |                            |      |     |                   |                  |                  |
| <b>Non-fatal events</b>                                 |                            |      |     |                   |                  |                  |
| Composites of non-fatal myocardial infarction or stroke | <b>Social isolation</b>    |      |     |                   |                  |                  |
|                                                         | Moderately vs. least       | 8147 | 9.1 | 1.11 (1.00-1.24)  | 1.02 (0.92-1.14) | 1.01 (0.91-1.13) |
|                                                         | Most vs. least             | 3804 | 9.6 | 1.22 (1.07-1.39)  | 0.99 (0.86-1.13) | 0.98 (0.85-1.12) |
|                                                         | <b>Items</b>               |      |     |                   |                  |                  |
|                                                         | Contacts (little vs. more) | 9601 | 9.2 | 1.11 (1.01-1.22)  | 1.00 (0.90-1.10) | 0.99 (0.90-1.09) |
|                                                         | Live alone (yes vs. no)    | 4602 | 9.9 | 1.16 (1.04-1.29)  | 1.01 (0.90-1.13) | 1.01 (0.90-1.13) |

|                                 |                            |      |     |                  |                  |                  |
|---------------------------------|----------------------------|------|-----|------------------|------------------|------------------|
| Non-fatal myocardial infarction | <b>Social isolation</b>    |      |     |                  |                  |                  |
|                                 | Moderately vs. least       | 8147 | 5.8 | 1.06 (0.93-1.21) | 0.98 (0.86-1.12) | 0.97 (0.85-1.11) |
|                                 | Most vs. least             | 3804 | 6.1 | 1.16 (0.99-1.36) | 0.95 (0.80-1.12) | 0.94 (0.79-1.11) |
|                                 | <b>Items</b>               |      |     |                  |                  |                  |
|                                 | Contacts (little vs. more) | 9601 | 5.9 | 1.07 (0.96-1.21) | 0.97 (0.86-1.09) | 0.96 (0.85-1.08) |
|                                 | Live alone (yes vs. no)    | 4602 | 6.0 | 1.08 (0.95-1.24) | 0.96 (0.83-1.10) | 0.96 (0.83-1.10) |
| Non-fatal stroke                | <b>Social isolation</b>    |      |     |                  |                  |                  |
|                                 | Moderately vs. least       | 8147 | 3.8 | 1.21 (1.03-1.43) | 1.11 (0.94-1.31) | 1.10 (0.93-1.30) |
|                                 | Most vs. least             | 3804 | 4.0 | 1.36 (1.12-1.67) | 1.10 (0.89-1.35) | 1.08 (0.87-1.33) |
|                                 | <b>Items</b>               |      |     |                  |                  |                  |
|                                 | Contacts (little vs. more) | 9601 | 3.7 | 1.15 (0.99-1.33) | 1.04 (0.89-1.20) | 1.02 (0.88-1.18) |
|                                 | Live alone (yes vs. no)    | 4602 | 4.4 | 1.32 (1.13-1.56) | 1.13 (0.96-1.34) | 1.14 (0.96-1.35) |

\*Model 1 adjusted for age and sex;

†Model 2 additionally adjusted for ethnicity, assessment centre, current employment status, education level, Townsend Deprivation Index, smoking status, alcohol consumption status, physical activity (MET Score), TV watching time, healthy diet score, sleep duration, ever seeking help from physicians due to anxiety or depressive symptoms, obesity status, grip strength, systolic blood pressure, diastolic blood pressure, hyperlipidaemia, and social isolation/loneliness;

‡Model 3 additionally adjusted for estimated glomerular filtration rate, family history of diabetes, HbA1c, diabetes duration, diabetes medication use, chronic kidney disease, diabetes-related microvascular disease, neurodegenerative disease, respiratory disease, digestive disease, rheumatoid arthritis, and osteoarthritis.

CI, confidence interval; CVD, cardiovascular disease; HR, hazard ratio; MET, metabolic equivalent of task.



**eTable 14. Sensitivity analyses of associations of loneliness and its items with subsequent risk for mortality, myocardial infarction, and stroke in sample by censoring up to Dec 31, 2019 (this date was considered as the start of the COVID-19 pandemic in the UK)**

| Outcomes                                               | Exposures                           | N    | Incident rate (per 1000 person-years) | Model 1*<br>HR (95% CI) | Model 2†<br>HR (95% CI) | Model 3‡<br>HR (95% CI) |
|--------------------------------------------------------|-------------------------------------|------|---------------------------------------|-------------------------|-------------------------|-------------------------|
| <b>Mortality</b>                                       |                                     |      |                                       |                         |                         |                         |
| All-cause mortality                                    | <b>Loneliness (yes vs. no)</b>      | 1487 | 12.5                                  | 1.39 (1.20-1.61)        | 1.04 (0.89-1.21)        | 1.04 (0.89-1.21)        |
|                                                        | <b>Items</b>                        |      |                                       |                         |                         |                         |
|                                                        | Lonely (yes vs. no)                 | 4570 | 11.5                                  | 1.42 (1.28-1.56)        | 1.14 (1.02-1.26)        | 1.13 (1.01-1.25)        |
|                                                        | Able to confide (never vs. usually) | 3849 | 12.8                                  | 1.30 (1.18-1.44)        | 1.12 (1.01-1.24)        | 1.10 (0.99-1.22)        |
| CVD mortality                                          | <b>Loneliness (yes vs. no)</b>      | 1487 | 6.4                                   | 1.48 (1.20-1.82)        | 1.10 (0.89-1.37)        | 1.11 (0.90-1.38)        |
|                                                        | <b>Items</b>                        |      |                                       |                         |                         |                         |
|                                                        | Lonely (yes vs. no)                 | 4570 | 5.5                                   | 1.42 (1.23-1.64)        | 1.14 (0.98-1.33)        | 1.13 (0.97-1.32)        |
|                                                        | Able to confide (never vs. usually) | 3849 | 6.7                                   | 1.44 (1.25-1.66)        | 1.23 (1.06-1.42)        | 1.21 (1.05-1.40)        |
| <b>Overall</b>                                         |                                     |      |                                       |                         |                         |                         |
| Composites of incident myocardial infarction or stroke | <b>Loneliness (yes vs. no)</b>      | 1487 | 14.4                                  | 1.70 (1.47-1.96)        | 1.44 (1.24-1.67)        | 1.42 (1.23-1.65)        |
|                                                        | <b>Items</b>                        |      |                                       |                         |                         |                         |
|                                                        | Lonely (yes vs. no)                 | 4570 | 11.2                                  | 1.43 (1.29-1.59)        | 1.23 (1.11-1.38)        | 1.22 (1.09-1.36)        |
|                                                        | Able to confide (never vs. usually) | 3849 | 12.5                                  | 1.34 (1.21-1.49)        | 1.23 (1.11-1.37)        | 1.22 (1.10-1.36)        |
| Incident myocardial infarction                         | <b>Loneliness (yes vs. no)</b>      | 1487 | 9.7                                   | 1.74 (1.46-2.06)        | 1.47 (1.23-1.76)        | 1.45 (1.21-1.74)        |
|                                                        | <b>Items</b>                        |      |                                       |                         |                         |                         |
|                                                        | Lonely (yes vs. no)                 | 4570 | 7.4                                   | 1.45 (1.27-1.64)        | 1.25 (1.09-1.43)        | 1.23 (1.07-1.41)        |

|                                                         |                                     |      |      |                  |                  |                  |
|---------------------------------------------------------|-------------------------------------|------|------|------------------|------------------|------------------|
|                                                         | Able to confide (never vs. usually) | 3849 | 8.3  | 1.34 (1.18-1.53) | 1.23 (1.08-1.41) | 1.22 (1.07-1.39) |
| Incident stroke                                         | <b>Loneliness (yes vs. no)</b>      | 1487 | 4.9  | 1.47 (1.16-1.87) | 1.22 (0.95-1.57) | 1.21 (0.94-1.55) |
|                                                         | <b>Items</b>                        |      |      |                  |                  |                  |
|                                                         | Lonely (yes vs. no)                 | 4570 | 4.2  | 1.37 (1.16-1.62) | 1.16 (0.98-1.38) | 1.14 (0.96-1.36) |
|                                                         | Able to confide (never vs. usually) | 3849 | 4.6  | 1.27 (1.07-1.50) | 1.15 (0.97-1.36) | 1.13 (0.96-1.35) |
| <hr/>                                                   |                                     |      |      |                  |                  |                  |
|                                                         | <b>Fatal events</b>                 |      |      |                  |                  |                  |
| Composites of fatal myocardial infarction or stroke     | <b>Loneliness (yes vs. no)</b>      | 1487 | 1.2  | 2.07 (1.27-3.36) | 1.51 (0.91-2.50) | 1.52 (0.91-2.51) |
|                                                         | <b>Items</b>                        |      |      |                  |                  |                  |
|                                                         | Lonely (yes vs. no)                 | 4570 | 0.9  | 1.81 (1.26-2.61) | 1.47 (0.99-2.16) | 1.42 (0.96-2.10) |
|                                                         | Able to confide (never vs. usually) | 3849 | 1.1  | 1.67 (1.16-2.41) | 1.36 (0.93-1.97) | 1.33 (0.92-1.94) |
| Fatal myocardial infarction                             | <b>Loneliness (yes vs. no)</b>      | 1487 | 1.1  | 2.35 (1.40-3.95) | 1.70 (0.99-2.93) | 1.72 (1.00-2.96) |
|                                                         | <b>Items</b>                        |      |      |                  |                  |                  |
|                                                         | Lonely (yes vs. no)                 | 4570 | 0.8  | 1.87 (1.25-2.79) | 1.49 (0.97-2.30) | 1.44 (0.93-2.22) |
|                                                         | Able to confide (never vs. usually) | 3849 | 0.9  | 1.91 (1.29-2.83) | 1.54 (1.02-2.32) | 1.53 (1.02-2.30) |
| Fatal Stroke                                            | <b>Loneliness (yes vs. no)</b>      | 1487 | 0.1  | 0.99 (0.23-4.18) | 0.76 (0.18-3.32) | 0.75 (0.17-3.29) |
|                                                         | <b>Items</b>                        |      |      |                  |                  |                  |
|                                                         | Lonely (yes vs. no)                 | 4570 | 0.2  | 1.55 (0.68-3.56) | 1.31 (0.54-3.17) | 1.29 (0.53-3.12) |
|                                                         | Able to confide (never vs. usually) | 3849 | 0.1  | 0.83 (0.32-2.20) | 0.70 (0.26-1.87) | 0.67 (0.25-1.80) |
| <hr/>                                                   |                                     |      |      |                  |                  |                  |
|                                                         | <b>Non-fatal events</b>             |      |      |                  |                  |                  |
| Composites of non-fatal myocardial infarction or stroke | <b>Loneliness (yes vs. no)</b>      | 1487 | 13.1 | 1.66 (1.43-1.93) | 1.43 (1.22-1.67) | 1.41 (1.21-1.65) |

|                                 |                                     |      |      |                  |                  |                  |
|---------------------------------|-------------------------------------|------|------|------------------|------------------|------------------|
|                                 | <b>Items</b>                        |      |      |                  |                  |                  |
|                                 | Lonely (yes vs. no)                 | 4570 | 10.2 | 1.40 (1.26-1.56) | 1.21 (1.08-1.36) | 1.20 (1.07-1.34) |
|                                 | Able to confide (never vs. usually) | 3849 | 11.4 | 1.32 (1.18-1.47) | 1.22 (1.09-1.36) | 1.21 (1.08-1.35) |
| Non-fatal myocardial infarction | <b>Loneliness (yes vs. no)</b>      | 1487 | 8.6  | 1.67 (1.39-2.01) | 1.44 (1.19-1.74) | 1.42 (1.17-1.72) |
|                                 | <b>Items</b>                        |      |      |                  |                  |                  |
|                                 | Lonely (yes vs. no)                 | 4570 | 6.6  | 1.41 (1.23-1.61) | 1.22 (1.06-1.41) | 1.21 (1.05-1.39) |
|                                 | Able to confide (never vs. usually) | 3849 | 7.3  | 1.29 (1.13-1.48) | 1.20 (1.05-1.38) | 1.19 (1.04-1.37) |
| Non-fatal stroke                | <b>Loneliness (yes vs. no)</b>      | 1487 | 4.8  | 1.49 (1.17-1.90) | 1.25 (0.97-1.60) | 1.23 (0.96-1.59) |
|                                 | <b>Items</b>                        |      |      |                  |                  |                  |
|                                 | Lonely (yes vs. no)                 | 4570 | 4.1  | 1.36 (1.15-1.61) | 1.16 (0.97-1.38) | 1.14 (0.95-1.36) |
|                                 | Able to confide (never vs. usually) | 3849 | 4.5  | 1.29 (1.08-1.53) | 1.17 (0.98-1.40) | 1.16 (0.97-1.38) |

\*Model 1 adjusted for age and sex;

†Model 2 additionally adjusted for ethnicity, assessment centre, current employment status, education level, Townsend Deprivation Index, smoking status, alcohol consumption status, physical activity (MET Score), TV watching time, healthy diet score, sleep duration, ever seeking help from physicians due to anxiety or depressive symptoms, obesity status, grip strength, systolic blood pressure, diastolic blood pressure, hyperlipidaemia, and social isolation/loneliness;

‡Model 3 additionally adjusted for estimated glomerular filtration rate, family history of diabetes, HbA1c, diabetes duration, diabetes medication use, chronic kidney disease, diabetes-related microvascular disease, neurodegenerative disease, respiratory disease, digestive disease, rheumatoid arthritis, and osteoarthritis.

CI, confidence interval; CVD, cardiovascular disease; HR, hazard ratio; MET, metabolic equivalent of task.

**eTable 15. Sensitivity analyses of associations of social isolation and its items with subsequent risk for mortality, myocardial infarction, and stroke with follow-up of six years**

| Outcomes                                               | Exposures                  | N    | Incident rate (per 1000 person-years) | Model 1*<br>HR (95% CI) | Model 2†<br>HR (95% CI) | Model 3‡<br>HR (95% CI) |
|--------------------------------------------------------|----------------------------|------|---------------------------------------|-------------------------|-------------------------|-------------------------|
| <b>Mortality</b>                                       |                            |      |                                       |                         |                         |                         |
| All-cause mortality                                    | <b>Social isolation</b>    |      |                                       |                         |                         |                         |
|                                                        | Moderately vs. least       | 8147 | 6.4                                   | 1.24 (1.05-1.47)        | 1.12 (0.94-1.33)        | 1.10 (0.93-1.31)        |
|                                                        | Most vs. least             | 3804 | 8.4                                   | 1.69 (1.39-2.05)        | 1.28 (1.04-1.57)        | 1.25 (1.02-1.54)        |
|                                                        | <b>Items</b>               |      |                                       |                         |                         |                         |
|                                                        | Contacts (little vs. more) | 9601 | 6.7                                   | 1.17 (1.02-1.36)        | 1.03 (0.88-1.19)        | 1.00 (0.86-1.17)        |
|                                                        | Live alone (yes vs. no)    | 4602 | 8.9                                   | 1.62 (1.39-1.89)        | 1.32 (1.12-1.56)        | 1.32 (1.12-1.56)        |
| CVD mortality                                          | <b>Social isolation</b>    |      |                                       |                         |                         |                         |
|                                                        | Moderately vs. least       | 8147 | 3.1                                   | 1.44 (1.12-1.86)        | 1.24 (0.96-1.61)        | 1.21 (0.94-1.57)        |
|                                                        | Most vs. least             | 3804 | 4.1                                   | 1.94 (1.46-2.58)        | 1.31 (0.97-1.77)        | 1.27 (0.94-1.72)        |
|                                                        | <b>Items</b>               |      |                                       |                         |                         |                         |
|                                                        | Contacts (little vs. more) | 9601 | 3.2                                   | 1.26 (1.02-1.56)        | 1.04 (0.83-1.30)        | 1.01 (0.81-1.26)        |
|                                                        | Live alone (yes vs. no)    | 4602 | 4.3                                   | 1.71 (1.37-2.14)        | 1.29 (1.02-1.64)        | 1.30 (1.02-1.66)        |
| <b>Overall</b>                                         |                            |      |                                       |                         |                         |                         |
| Composites of incident myocardial infarction or stroke | <b>Social isolation</b>    |      |                                       |                         |                         |                         |
|                                                        | Moderately vs. least       | 8147 | 7.4                                   | 1.20 (1.03-1.41)        | 1.08 (0.92-1.27)        | 1.07 (0.91-1.25)        |
|                                                        | Most vs. least             | 3804 | 8.5                                   | 1.42 (1.18-1.71)        | 1.10 (0.91-1.34)        | 1.09 (0.89-1.32)        |

|                                                     |                            |      |     |                  |                  |                  |
|-----------------------------------------------------|----------------------------|------|-----|------------------|------------------|------------------|
|                                                     | <b>Items</b>               |      |     |                  |                  |                  |
|                                                     | Contacts (little vs. more) | 9601 | 7.8 | 1.22 (1.06-1.40) | 1.08 (0.93-1.24) | 1.06 (0.92-1.22) |
|                                                     | Live alone (yes vs. no)    | 4602 | 8.3 | 1.22 (1.05-1.43) | 1.01 (0.86-1.19) | 1.02 (0.87-1.20) |
| Incident myocardial infarction                      | <b>Social isolation</b>    |      |     |                  |                  |                  |
|                                                     | Moderately vs. least       | 8147 | 4.7 | 1.11 (0.91-1.34) | 1.01 (0.83-1.23) | 1.00 (0.82-1.22) |
|                                                     | Most vs. least             | 3804 | 5.1 | 1.22 (0.97-1.54) | 0.97 (0.76-1.24) | 0.95 (0.74-1.22) |
|                                                     | <b>Items</b>               |      |     |                  |                  |                  |
|                                                     | Contacts (little vs. more) | 9601 | 4.8 | 1.11 (0.93-1.31) | 0.99 (0.83-1.18) | 0.97 (0.82-1.16) |
|                                                     | Live alone (yes vs. no)    | 4602 | 4.9 | 1.10 (0.90-1.34) | 0.93 (0.75-1.15) | 0.94 (0.76-1.15) |
| Incident stroke                                     | <b>Social isolation</b>    |      |     |                  |                  |                  |
|                                                     | Moderately vs. least       | 8147 | 3.0 | 1.42 (1.09-1.83) | 1.25 (0.96-1.62) | 1.23 (0.94-1.59) |
|                                                     | Most vs. least             | 3804 | 3.7 | 1.84 (1.37-2.47) | 1.36 (1.00-1.86) | 1.34 (0.98-1.82) |
|                                                     | <b>Items</b>               |      |     |                  |                  |                  |
|                                                     | Contacts (little vs. more) | 9601 | 3.2 | 1.35 (1.08-1.68) | 1.16 (0.93-1.46) | 1.13 (0.90-1.42) |
|                                                     | Live alone (yes vs. no)    | 4602 | 3.9 | 1.59 (1.26-2.01) | 1.28 (1.00-1.63) | 1.29 (1.01-1.65) |
| <hr/>                                               |                            |      |     |                  |                  |                  |
| <b>Fatal events</b>                                 |                            |      |     |                  |                  |                  |
| Composites of fatal myocardial infarction or stroke | <b>Social isolation</b>    |      |     |                  |                  |                  |
|                                                     | Moderately vs. least       | 8147 | 0.5 | 1.95 (1.00-3.80) | 1.75 (0.89-3.44) | 1.71 (0.87-3.37) |
|                                                     | Most vs. least             | 3804 | 1.0 | 3.66 (1.84-7.27) | 2.78 (1.34-5.76) | 2.77 (1.33-5.76) |
|                                                     | <b>Items</b>               |      |     |                  |                  |                  |

|                                                         |                            |      |     |                   |                   |                   |
|---------------------------------------------------------|----------------------------|------|-----|-------------------|-------------------|-------------------|
|                                                         | Contacts (little vs. more) | 9601 | 0.7 | 2.07 (1.22-3.52)  | 1.77 (1.02-3.05)  | 1.74 (1.01-3.00)  |
|                                                         | Live alone (yes vs. no)    | 4602 | 0.9 | 2.17 (1.30-3.63)  | 1.73 (0.99-3.01)  | 1.76 (1.01-3.07)  |
| Fatal myocardial infarction                             | <b>Social isolation</b>    |      |     |                   |                   |                   |
|                                                         | Moderately vs. least       | 8147 | 0.4 | 2.07 (0.97-4.40)  | 1.89 (0.88-4.06)  | 1.89 (0.88-4.06)  |
|                                                         | Most vs. least             | 3804 | 0.7 | 3.54 (1.60-7.81)  | 2.74 (1.18-6.33)  | 2.75 (1.19-6.40)  |
|                                                         | <b>Items</b>               |      |     |                   |                   |                   |
|                                                         | Contacts (little vs. more) | 9601 | 0.5 | 2.15 (1.17-3.94)  | 1.85 (0.99-3.44)  | 1.83 (0.98-3.41)  |
|                                                         | Live alone (yes vs. no)    | 4602 | 0.6 | 1.89 (1.04-3.42)  | 1.52 (0.80-2.89)  | 1.56 (0.82-2.96)  |
| Fatal stroke                                            | <b>Social isolation</b>    |      |     |                   |                   |                   |
|                                                         | Moderately vs. least       | 8147 | 0.1 | 1.58 (0.38-6.60)  | 1.34 (0.31-5.74)  | 1.31 (0.30-5.64)  |
|                                                         | Most vs. least             | 3804 | 0.3 | 4.01 (1.00-16.13) | 2.81 (0.64-12.33) | 2.81 (0.63-12.49) |
|                                                         | <b>Items</b>               |      |     |                   |                   |                   |
|                                                         | Contacts (little vs. more) | 9601 | 0.2 | 1.84 (0.62-5.52)  | 1.53 (0.49-4.76)  | 1.46 (0.47-4.60)  |
|                                                         | Live alone (yes vs. no)    | 4602 | 0.3 | 3.37 (1.18-9.61)  | 2.59 (0.83-8.05)  | 2.78 (0.89-8.71)  |
| <hr/>                                                   |                            |      |     |                   |                   |                   |
| <b>Non-fatal events</b>                                 |                            |      |     |                   |                   |                   |
| Composites of non-fatal myocardial infarction or stroke | <b>Social isolation</b>    |      |     |                   |                   |                   |
|                                                         | Moderately vs. least       | 8147 | 6.8 | 1.17 (0.99-1.37)  | 1.05 (0.89-1.24)  | 1.04 (0.88-1.23)  |
|                                                         | Most vs. least             | 3804 | 7.5 | 1.32 (1.08-1.60)  | 1.02 (0.83-1.25)  | 1.01 (0.82-1.24)  |
|                                                         | <b>Items</b>               |      |     |                   |                   |                   |
|                                                         | Contacts (little vs. more) | 9601 | 7.1 | 1.17 (1.01-1.35)  | 1.04 (0.90-1.20)  | 1.02 (0.88-1.18)  |
|                                                         | Live alone (yes vs. no)    | 4602 | 7.4 | 1.16 (0.99-1.37)  | 0.96 (0.81-1.14)  | 0.97 (0.82-1.16)  |

|                                 |                            |      |     |                  |                  |                  |
|---------------------------------|----------------------------|------|-----|------------------|------------------|------------------|
| Non-fatal myocardial infarction | <b>Social isolation</b>    |      |     |                  |                  |                  |
|                                 | Moderately vs. least       | 8147 | 4.2 | 1.06 (0.87-1.29) | 0.97 (0.79-1.19) | 0.96 (0.78-1.17) |
|                                 | Most vs. least             | 3804 | 4.3 | 1.10 (0.86-1.41) | 0.87 (0.67-1.13) | 0.86 (0.66-1.12) |
|                                 | <b>Items</b>               |      |     |                  |                  |                  |
|                                 | Contacts (little vs. more) | 9601 | 4.2 | 1.04 (0.87-1.24) | 0.93 (0.78-1.12) | 0.92 (0.76-1.10) |
|                                 | Live alone (yes vs. no)    | 4602 | 4.3 | 1.03 (0.84-1.28) | 0.88 (0.71-1.10) | 0.89 (0.71-1.11) |
| Non-fatal stroke                | <b>Social isolation</b>    |      |     |                  |                  |                  |
|                                 | Moderately vs. least       | 8147 | 2.9 | 1.41 (1.08-1.84) | 1.24 (0.95-1.62) | 1.22 (0.94-1.60) |
|                                 | Most vs. least             | 3804 | 3.5 | 1.77 (1.31-2.39) | 1.31 (0.95-1.80) | 1.28 (0.93-1.76) |
|                                 | <b>Items</b>               |      |     |                  |                  |                  |
|                                 | Contacts (little vs. more) | 9601 | 3.0 | 1.33 (1.06-1.67) | 1.15 (0.91-1.45) | 1.12 (0.89-1.41) |
|                                 | Live alone (yes vs. no)    | 4602 | 3.7 | 1.53 (1.21-1.95) | 1.23 (0.95-1.59) | 1.25 (0.97-1.61) |

\*Model 1 adjusted for age and sex;

†Model 2 additionally adjusted for ethnicity, assessment centre, current employment status, education level, Townsend Deprivation Index, smoking status, alcohol consumption status, physical activity (MET Score), TV watching time, healthy diet score, sleep duration, ever seeking help from physicians due to anxiety or depressive symptoms, obesity status, grip strength, systolic blood pressure, diastolic blood pressure, hyperlipidaemia, and social isolation/loneliness;

‡Model 3 additionally adjusted for estimated glomerular filtration rate, family history of diabetes, HbA1c, diabetes duration, diabetes medication use, chronic kidney disease, diabetes-related microvascular disease, neurodegenerative disease, respiratory disease, digestive disease, rheumatoid arthritis, and osteoarthritis.

CI, confidence interval; CVD, cardiovascular disease; HR, hazard ratio; MET, metabolic equivalent of task.

**eTable 16. Sensitivity analyses of associations of social isolation and its items with subsequent risk for mortality, myocardial infarction, and stroke excluding the events occurring in the first six years**

| Outcomes                                               | Exposures                  | N    | Incident rate (per 1000 person-years) | Model 1*<br>HR (95% CI) | Model 2†<br>HR (95% CI) | Model 3‡<br>HR (95% CI) |
|--------------------------------------------------------|----------------------------|------|---------------------------------------|-------------------------|-------------------------|-------------------------|
| <b>Mortality</b>                                       |                            |      |                                       |                         |                         |                         |
| All-cause mortality                                    | <b>Social isolation</b>    |      |                                       |                         |                         |                         |
|                                                        | Moderately vs. least       | 7841 | 17.8                                  | 1.29 (1.17-1.43)        | 1.19 (1.08-1.32)        | 1.18 (1.07-1.31)        |
|                                                        | Most vs. least             | 3616 | 22.2                                  | 1.71 (1.52-1.91)        | 1.39 (1.23-1.57)        | 1.35 (1.20-1.53)        |
|                                                        | <b>Items</b>               |      |                                       |                         |                         |                         |
|                                                        | Contacts (little vs. more) | 9220 | 16.1                                  | 1.28 (1.17-1.40)        | 1.17 (1.07-1.27)        | 1.14 (1.04-1.25)        |
|                                                        | Live alone (yes vs. no)    | 4362 | 23.5                                  | 1.53 (1.39-1.68)        | 1.29 (1.17-1.43)        | 1.30 (1.18-1.44)        |
| CVD mortality                                          | <b>Social isolation</b>    |      |                                       |                         |                         |                         |
|                                                        | Moderately vs. least       | 7841 | 8.9                                   | 1.37 (1.19-1.58)        | 1.25 (1.08-1.45)        | 1.23 (1.06-1.42)        |
|                                                        | Most vs. least             | 3616 | 11.3                                  | 1.83 (1.55-2.15)        | 1.45 (1.22-1.72)        | 1.40 (1.18-1.67)        |
|                                                        | <b>Items</b>               |      |                                       |                         |                         |                         |
|                                                        | Contacts (little vs. more) | 9220 | 9.6                                   | 1.36 (1.20-1.53)        | 1.21 (1.07-1.37)        | 1.17 (1.03-1.33)        |
|                                                        | Live alone (yes vs. no)    | 4362 | 12.0                                  | 1.62 (1.42-1.85)        | 1.38 (1.20-1.59)        | 1.40 (1.22-1.61)        |
| <b>Overall</b>                                         |                            |      |                                       |                         |                         |                         |
| Composites of incident myocardial infarction or stroke | <b>Social isolation</b>    |      |                                       |                         |                         |                         |
|                                                        | Moderately vs. least       | 7559 | 12.9                                  | 1.07 (0.96-1.21)        | 0.99 (0.88-1.11)        | 0.98 (0.87-1.10)        |
|                                                        | Most vs. least             | 3472 | 13.7                                  | 1.17 (1.02-1.35)        | 0.96 (0.82-1.11)        | 0.94 (0.81-1.10)        |



|                                                     |                            |      |      |                  |                  |                  |
|-----------------------------------------------------|----------------------------|------|------|------------------|------------------|------------------|
|                                                     | <b>Items</b>               |      |      |                  |                  |                  |
|                                                     | Contacts (little vs. more) | 8874 | 12.7 | 1.03 (0.93-1.14) | 0.93 (0.84-1.03) | 0.92 (0.83-1.03) |
|                                                     | Live alone (yes vs. no)    | 4200 | 14.9 | 1.22 (1.09-1.37) | 1.08 (0.95-1.22) | 1.07 (0.95-1.21) |
| Incident myocardial infarction                      | <b>Social isolation</b>    |      |      |                  |                  |                  |
|                                                     | Moderately vs. least       | 7661 | 8.3  | 1.08 (0.93-1.24) | 0.98 (0.85-1.14) | 0.98 (0.85-1.13) |
|                                                     | Most vs. least             | 3527 | 9.7  | 1.29 (1.08-1.52) | 1.05 (0.88-1.25) | 1.03 (0.86-1.24) |
|                                                     | <b>Items</b>               |      |      |                  |                  |                  |
|                                                     | Contacts (little vs. more) | 9004 | 8.6  | 1.09 (0.96-1.24) | 0.97 (0.86-1.11) | 0.97 (0.85-1.10) |
|                                                     | Live alone (yes vs. no)    | 4260 | 9.7  | 1.23 (1.06-1.42) | 1.09 (0.94-1.27) | 1.08 (0.93-1.25) |
| Incident stroke                                     | <b>Social isolation</b>    |      |      |                  |                  |                  |
|                                                     | Moderately vs. least       | 7728 | 5.2  | 1.06 (0.89-1.27) | 0.99 (0.82-1.18) | 0.98 (0.82-1.17) |
|                                                     | Most vs. least             | 3554 | 4.8  | 1.00 (0.80-1.26) | 0.83 (0.65-1.05) | 0.82 (0.64-1.04) |
|                                                     | <b>Items</b>               |      |      |                  |                  |                  |
|                                                     | Contacts (little vs. more) | 9078 | 4.9  | 0.96 (0.82-1.13) | 0.89 (0.75-1.05) | 0.88 (0.74-1.04) |
|                                                     | Live alone (yes vs. no)    | 4290 | 5.7  | 1.14 (0.95-1.37) | 1.00 (0.82-1.21) | 1.00 (0.82-1.22) |
| <hr/>                                               |                            |      |      |                  |                  |                  |
| <b>Fatal events</b>                                 |                            |      |      |                  |                  |                  |
| Composites of fatal myocardial infarction or stroke | <b>Social isolation</b>    |      |      |                  |                  |                  |
|                                                     | Moderately vs. least       | 7841 | 0.9  | 1.35 (0.86-2.11) | 1.19 (0.75-1.88) | 1.19 (0.75-1.87) |
|                                                     | Most vs. least             | 3616 | 1.4  | 2.11 (1.29-3.45) | 1.55 (0.92-2.62) | 1.54 (0.91-2.60) |
|                                                     | <b>Items</b>               |      |      |                  |                  |                  |

|                                                         |                            |      |      |                  |                  |                  |
|---------------------------------------------------------|----------------------------|------|------|------------------|------------------|------------------|
|                                                         | Contacts (little vs. more) | 9220 | 1.0  | 1.40 (0.95-2.04) | 1.19 (0.81-1.75) | 1.18 (0.80-1.74) |
|                                                         | Live alone (yes vs. no)    | 4362 | 1.4  | 1.87 (1.26-2.77) | 1.53 (1.00-2.33) | 1.52 (0.99-2.32) |
| Fatal myocardial infarction                             | <b>Social isolation</b>    |      |      |                  |                  |                  |
|                                                         | Moderately vs. least       | 7841 | 0.6  | 1.16 (0.70-1.94) | 1.03 (0.61-1.74) | 1.04 (0.62-1.74) |
|                                                         | Most vs. least             | 3616 | 1.2  | 2.29 (1.35-3.90) | 1.68 (0.96-2.95) | 1.66 (0.94-2.93) |
|                                                         | <b>Items</b>               |      |      |                  |                  |                  |
|                                                         | Contacts (little vs. more) | 9220 | 0.8  | 1.33 (0.87-2.04) | 1.14 (0.74-1.76) | 1.13 (0.73-1.75) |
|                                                         | Live alone (yes vs. no)    | 4362 | 1.2  | 2.14 (1.38-3.30) | 1.71 (1.07-2.73) | 1.70 (1.06-2.72) |
| Fatal stroke                                            | <b>Social isolation</b>    |      |      |                  |                  |                  |
|                                                         | Moderately vs. least       | 7841 | 0.3  | 2.36 (0.91-6.15) | 2.09 (0.79-5.52) | 2.06 (0.78-5.46) |
|                                                         | Most vs. least             | 3616 | 0.1  | 1.20 (0.30-4.81) | 0.88 (0.21-3.69) | 0.87 (0.21-3.68) |
|                                                         | <b>Items</b>               |      |      |                  |                  |                  |
|                                                         | Contacts (little vs. more) | 9220 | 0.2  | 1.51 (0.66-3.45) | 1.24 (0.53-2.88) | 1.22 (0.52-2.86) |
|                                                         | Live alone (yes vs. no)    | 4362 | 0.2  | 1.22 (0.48-3.11) | 1.11 (0.41-2.97) | 1.08 (0.40-2.92) |
| <hr/>                                                   |                            |      |      |                  |                  |                  |
| <b>Non-fatal events</b>                                 |                            |      |      |                  |                  |                  |
| Composites of non-fatal myocardial infarction or stroke | <b>Social isolation</b>    |      |      |                  |                  |                  |
|                                                         | Moderately vs. least       | 7559 | 12.0 | 1.06 (0.94-1.19) | 0.98 (0.87-1.10) | 0.97 (0.86-1.09) |
|                                                         | Most vs. least             | 3472 | 12.3 | 1.12 (0.96-1.30) | 0.92 (0.79-1.07) | 0.90 (0.77-1.06) |
|                                                         | <b>Items</b>               |      |      |                  |                  |                  |
|                                                         | Contacts (little vs. more) | 8874 | 11.7 | 1.01 (0.91-1.13) | 0.92 (0.82-1.02) | 0.91 (0.81-1.01) |
|                                                         | Live alone (yes vs. no)    | 4200 | 13.4 | 1.17 (1.04-1.33) | 1.04 (0.92-1.19) | 1.03 (0.91-1.18) |

|                                 |                            |      |     |                  |                  |                  |
|---------------------------------|----------------------------|------|-----|------------------|------------------|------------------|
| Non-fatal myocardial infarction | <b>Social isolation</b>    |      |     |                  |                  |                  |
|                                 | Moderately vs. least       | 7661 | 7.6 | 1.07 (0.92-1.24) | 0.98 (0.85-1.14) | 0.97 (0.84-1.13) |
|                                 | Most vs. least             | 3527 | 8.4 | 1.20 (1.00-1.44) | 0.99 (0.82-1.20) | 0.98 (0.81-1.18) |
|                                 | <b>Items</b>               |      |     |                  |                  |                  |
|                                 | Contacts (little vs. more) | 9004 | 7.8 | 1.07 (0.93-1.22) | 0.96 (0.84-1.10) | 0.95 (0.83-1.09) |
|                                 | Live alone (yes vs. no)    | 4260 | 8.5 | 1.15 (0.99-1.34) | 1.04 (0.88-1.21) | 1.02 (0.87-1.20) |
| Non-fatal stroke                | <b>Social isolation</b>    |      |     |                  |                  |                  |
|                                 | Moderately vs. least       | 7728 | 5.0 | 1.03 (0.86-1.23) | 0.96 (0.80-1.15) | 0.95 (0.79-1.14) |
|                                 | Most vs. least             | 3554 | 4.6 | 1.00 (0.79-1.26) | 0.83 (0.65-1.05) | 0.81 (0.64-1.04) |
|                                 | <b>Items</b>               |      |     |                  |                  |                  |
|                                 | Contacts (little vs. more) | 9078 | 4.6 | 0.95 (0.80-1.12) | 0.87 (0.74-1.03) | 0.86 (0.73-1.02) |
|                                 | Live alone (yes vs. no)    | 4290 | 5.4 | 1.14 (0.94-1.37) | 0.99 (0.82-1.21) | 1.00 (0.82-1.21) |

\*Model 1 adjusted for age and sex;

†Model 2 additionally adjusted for ethnicity, assessment centre, current employment status, education level, Townsend Deprivation Index, smoking status, alcohol consumption status, physical activity (MET Score), TV watching time, healthy diet score, sleep duration, ever seeking help from physicians due to anxiety or depressive symptoms, obesity status, grip strength, systolic blood pressure, diastolic blood pressure, hyperlipidaemia, and social isolation/loneliness;

‡Model 3 additionally adjusted for estimated glomerular filtration rate, family history of diabetes, HbA1c, diabetes duration, diabetes medication use, chronic kidney disease, diabetes-related microvascular disease, neurodegenerative disease, respiratory disease, digestive disease, rheumatoid arthritis, and osteoarthritis.

CI, confidence interval; CVD, cardiovascular disease; HR, hazard ratio; MET, metabolic equivalent of task.

**eTable 17. Sensitivity analyses of associations of loneliness and its items with subsequent risk for mortality, myocardial infarction, and stroke with follow-up of six years**

| Outcomes                                               | Exposures                           | N    | Incident rate (per 1000 person-years) | Model 1*<br>HR (95% CI) | Model 2†<br>HR (95% CI) | Model 3‡<br>HR (95% CI) |
|--------------------------------------------------------|-------------------------------------|------|---------------------------------------|-------------------------|-------------------------|-------------------------|
| <b>Mortality</b>                                       |                                     |      |                                       |                         |                         |                         |
| All-cause mortality                                    | <b>Loneliness (yes vs. no)</b>      | 1487 | 9.3                                   | 1.65 (1.31-2.09)        | 1.21 (0.95-1.54)        | 1.22 (0.96-1.55)        |
|                                                        | <b>Items</b>                        |      |                                       |                         |                         |                         |
|                                                        | Lonely (yes vs. no)                 | 4570 | 7.5                                   | 1.49 (1.26-1.75)        | 1.15 (0.97-1.38)        | 1.15 (0.96-1.37)        |
|                                                        | Able to confide (never vs. usually) | 3849 | 8.5                                   | 1.40 (1.19-1.65)        | 1.19 (1.01-1.41)        | 1.18 (0.99-1.40)        |
| CVD mortality                                          | <b>Loneliness (yes vs. no)</b>      | 1487 | 4.9                                   | 1.92 (1.39-2.64)        | 1.38 (0.99-1.92)        | 1.42 (1.02-1.99)        |
|                                                        | <b>Items</b>                        |      |                                       |                         |                         |                         |
|                                                        | Lonely (yes vs. no)                 | 4570 | 3.5                                   | 1.51 (1.19-1.92)        | 1.15 (0.89-1.48)        | 1.15 (0.89-1.49)        |
|                                                        | Able to confide (never vs. usually) | 3849 | 4.6                                   | 1.71 (1.36-2.16)        | 1.43 (1.12-1.81)        | 1.42 (1.12-1.80)        |
| <b>Overall</b>                                         |                                     |      |                                       |                         |                         |                         |
| Composites of incident myocardial infarction or stroke | <b>Loneliness (yes vs. no)</b>      | 1487 | 11.0                                  | 1.73 (1.39-2.14)        | 1.39 (1.11-1.73)        | 1.38 (1.11-1.73)        |
|                                                        | <b>Items</b>                        |      |                                       |                         |                         |                         |
|                                                        | Lonely (yes vs. no)                 | 4570 | 8.6                                   | 1.51 (1.29-1.76)        | 1.25 (1.06-1.47)        | 1.23 (1.04-1.45)        |
|                                                        | Able to confide (never vs. usually) | 3849 | 9.5                                   | 1.35 (1.15-1.58)        | 1.20 (1.02-1.41)        | 1.19 (1.01-1.40)        |
| Incident myocardial infarction                         | <b>Loneliness (yes vs. no)</b>      | 1487 | 7.5                                   | 1.85 (1.43-2.40)        | 1.53 (1.17-2.00)        | 1.53 (1.16-2.00)        |
|                                                        | <b>Items</b>                        |      |                                       |                         |                         |                         |
|                                                        | Lonely (yes vs. no)                 | 4570 | 5.5                                   | 1.49 (1.23-1.81)        | 1.26 (1.03-1.56)        | 1.26 (1.02-1.54)        |

|                                                     |                                     |      |     |                  |                  |                  |
|-----------------------------------------------------|-------------------------------------|------|-----|------------------|------------------|------------------|
|                                                     | Able to confide (never vs. usually) | 3849 | 6.3 | 1.41 (1.16-1.71) | 1.28 (1.05-1.56) | 1.26 (1.04-1.54) |
| Incident stroke                                     | <b>Loneliness (yes vs. no)</b>      | 1487 | 3.9 | 1.58 (1.11-2.26) | 1.18 (0.82-1.71) | 1.18 (0.82-1.71) |
|                                                     | <b>Items</b>                        |      |     |                  |                  |                  |
|                                                     | Lonely (yes vs. no)                 | 4570 | 3.5 | 1.61 (1.27-2.06) | 1.27 (0.98-1.65) | 1.24 (0.96-1.61) |
|                                                     | Able to confide (never vs. usually) | 3849 | 3.4 | 1.25 (0.97-1.62) | 1.06 (0.81-1.37) | 1.05 (0.81-1.36) |
| <hr/>                                               |                                     |      |     |                  |                  |                  |
|                                                     | <b>Fatal events</b>                 |      |     |                  |                  |                  |
| Composites of fatal myocardial infarction or stroke | <b>Loneliness (yes vs. no)</b>      | 1487 | 0.9 | 2.01 (0.95-4.24) | 1.37 (0.63-2.98) | 1.38 (0.63-3.02) |
|                                                     | <b>Items</b>                        |      |     |                  |                  |                  |
|                                                     | Lonely (yes vs. no)                 | 4570 | 0.8 | 2.09 (1.22-3.56) | 1.60 (0.90-2.84) | 1.57 (0.88-2.80) |
|                                                     | Able to confide (never vs. usually) | 3849 | 1.0 | 2.37 (1.41-3.98) | 1.86 (1.09-3.18) | 1.82 (1.07-3.12) |
| Fatal myocardial infarction                         | <b>Loneliness (yes vs. no)</b>      | 1487 | 0.8 | 2.40 (1.07-5.38) | 1.65 (0.71-3.86) | 1.67 (0.71-3.91) |
|                                                     | <b>Items</b>                        |      |     |                  |                  |                  |
|                                                     | Lonely (yes vs. no)                 | 4570 | 0.6 | 1.91 (1.02-3.54) | 1.44 (0.74-2.82) | 1.43 (0.73-2.78) |
|                                                     | Able to confide (never vs. usually) | 3849 | 0.9 | 3.19 (1.79-5.69) | 2.57 (1.42-4.67) | 2.51 (1.38-4.56) |
| Fatal Stroke                                        | <b>Loneliness (yes vs. no)</b>      | 1487 | 0.1 | 0.94 (0.12-7.19) | 0.60 (0.08-4.80) | 0.56 (0.07-4.55) |
|                                                     | <b>Items</b>                        |      |     |                  |                  |                  |
|                                                     | Lonely (yes vs. no)                 | 4570 | 0.2 | 2.78 (0.95-8.14) | 2.17 (0.69-6.89) | 2.17 (0.67-6.99) |
|                                                     | Able to confide (never vs. usually) | 3849 | 0.1 | 0.63 (0.14-2.82) | 0.45 (0.10-2.07) | 0.44 (0.09-2.03) |
| <hr/>                                               |                                     |      |     |                  |                  |                  |
|                                                     | <b>Non-fatal events</b>             |      |     |                  |                  |                  |

|                                                         |                                     |      |      |                  |                  |                  |
|---------------------------------------------------------|-------------------------------------|------|------|------------------|------------------|------------------|
| Composites of non-fatal myocardial infarction or stroke | <b>Loneliness (yes vs. no)</b>      | 1487 | 10.1 | 1.70 (1.36-2.13) | 1.39 (1.10-1.75) | 1.38 (1.09-1.74) |
|                                                         | <b>Items</b>                        |      |      |                  |                  |                  |
|                                                         | Lonely (yes vs. no)                 | 4570 | 7.8  | 1.46 (1.25-1.72) | 1.22 (1.02-1.45) | 1.20 (1.01-1.43) |
| Non-fatal myocardial infarction                         | Able to confide (never vs. usually) | 3849 | 8.4  | 1.28 (1.09-1.51) | 1.15 (0.97-1.36) | 1.14 (0.96-1.35) |
|                                                         | <b>Loneliness (yes vs. no)</b>      | 1487 | 6.7  | 1.80 (1.37-2.37) | 1.51 (1.14-2.01) | 1.51 (1.13-2.01) |
|                                                         | <b>Items</b>                        |      |      |                  |                  |                  |
| Non-fatal stroke                                        | Lonely (yes vs. no)                 | 4570 | 4.9  | 1.45 (1.19-1.78) | 1.24 (1.00-1.55) | 1.24 (0.99-1.54) |
|                                                         | Able to confide (never vs. usually) | 3849 | 5.4  | 1.28 (1.04-1.58) | 1.18 (0.95-1.45) | 1.16 (0.94-1.44) |
|                                                         | <b>Loneliness (yes vs. no)</b>      | 1487 | 3.8  | 1.61 (1.12-2.32) | 1.22 (0.84-1.77) | 1.22 (0.84-1.77) |
| Non-fatal stroke                                        | <b>Items</b>                        |      |      |                  |                  |                  |
|                                                         | Lonely (yes vs. no)                 | 4570 | 3.3  | 1.57 (1.22-2.01) | 1.24 (0.95-1.62) | 1.21 (0.93-1.58) |
|                                                         | Able to confide (never vs. usually) | 3849 | 3.3  | 1.28 (0.99-1.67) | 1.09 (0.84-1.43) | 1.09 (0.83-1.42) |

\*Model 1 adjusted for age and sex;

†Model 2 additionally adjusted for ethnicity, assessment centre, current employment status, education level, Townsend Deprivation Index, smoking status, alcohol consumption status, physical activity (MET Score), TV watching time, healthy diet score, sleep duration, ever seeking help from physicians due to anxiety or depressive symptoms, obesity status, grip strength, systolic blood pressure, diastolic blood pressure, hyperlipidaemia, and social isolation/loneliness;

‡Model 3 additionally adjusted for estimated glomerular filtration rate, family history of diabetes, HbA1c, diabetes duration, diabetes medication use, chronic kidney disease, diabetes-related microvascular disease, neurodegenerative disease, respiratory disease, digestive disease, rheumatoid arthritis, and osteoarthritis.

CI, confidence interval; CVD, cardiovascular disease; HR, hazard ratio; MET, metabolic equivalent of task.

**eTable 18. Sensitivity analyses of associations of loneliness and its items with subsequent risk for mortality, myocardial infarction, and stroke excluding the events occurring in the first six years**

| Outcomes                                               | Exposures                           | N    | Incident rate (per 1000 person-years) | Model 1*<br>HR (95% CI) | Model 2†<br>HR (95% CI) | Model 3‡<br>HR (95% CI) |
|--------------------------------------------------------|-------------------------------------|------|---------------------------------------|-------------------------|-------------------------|-------------------------|
| <b>Mortality</b>                                       |                                     |      |                                       |                         |                         |                         |
| All-cause mortality                                    | <b>Loneliness (yes vs. no)</b>      | 1406 | 18.8                                  | 1.23 (1.05-1.44)        | 0.92 (0.78-1.08)        | 0.92 (0.78-1.08)        |
|                                                        | <b>Items</b>                        |      |                                       |                         |                         |                         |
|                                                        | Lonely (yes vs. no)                 | 4368 | 19.0                                  | 1.37 (1.24-1.52)        | 1.10 (0.99-1.23)        | 1.09 (0.98-1.22)        |
|                                                        | Able to confide (never vs. usually) | 3656 | 20.7                                  | 1.22 (1.10-1.35)        | 1.05 (0.95-1.17)        | 1.04 (0.94-1.15)        |
| CVD mortality                                          | <b>Loneliness (yes vs. no)</b>      | 1406 | 9.4                                   | 1.24 (0.99-1.55)        | 0.91 (0.72-1.14)        | 0.91 (0.72-1.14)        |
|                                                        | <b>Items</b>                        |      |                                       |                         |                         |                         |
|                                                        | Lonely (yes vs. no)                 | 4368 | 9.3                                   | 1.37 (1.19-1.58)        | 1.08 (0.92-1.25)        | 1.06 (0.91-1.23)        |
|                                                        | Able to confide (never vs. usually) | 3656 | 10.5                                  | 1.24 (1.08-1.44)        | 1.06 (0.91-1.23)        | 1.04 (0.90-1.20)        |
| <b>Overall</b>                                         |                                     |      |                                       |                         |                         |                         |
| Composites of incident myocardial infarction or stroke | <b>Loneliness (yes vs. no)</b>      | 1332 | 18.1                                  | 1.58 (1.33-1.88)        | 1.38 (1.16-1.65)        | 1.36 (1.14-1.62)        |
|                                                        | <b>Items</b>                        |      |                                       |                         |                         |                         |
|                                                        | Lonely (yes vs. no)                 | 4192 | 14.7                                  | 1.39 (1.24-1.57)        | 1.23 (1.08-1.39)        | 1.20 (1.06-1.37)        |
|                                                        | Able to confide (never vs. usually) | 3492 | 15.8                                  | 1.25 (1.11-1.42)        | 1.17 (1.04-1.33)        | 1.16 (1.03-1.32)        |
| Incident myocardial infarction                         | <b>Loneliness (yes vs. no)</b>      | 1352 | 11.1                                  | 1.47 (1.18-1.81)        | 1.23 (0.99-1.54)        | 1.22 (0.98-1.51)        |
|                                                        | <b>Items</b>                        |      |                                       |                         |                         |                         |
|                                                        | Lonely (yes vs. no)                 | 4246 | 9.4                                   | 1.36 (1.18-1.57)        | 1.16 (0.99-1.35)        | 1.14 (0.97-1.33)        |

|                                                     |                                     |      |      |                  |                  |                  |
|-----------------------------------------------------|-------------------------------------|------|------|------------------|------------------|------------------|
|                                                     | Able to confide (never vs. usually) | 3548 | 10.4 | 1.24 (1.07-1.44) | 1.15 (0.99-1.34) | 1.14 (0.98-1.32) |
| Incident stroke                                     | <b>Loneliness (yes vs. no)</b>      | 1382 | 7.2  | 1.59 (1.22-2.06) | 1.46 (1.11-1.91) | 1.43 (1.09-1.87) |
|                                                     | <b>Items</b>                        |      |      |                  |                  |                  |
|                                                     | Lonely (yes vs. no)                 | 4305 | 5.8  | 1.35 (1.12-1.63) | 1.25 (1.02-1.52) | 1.23 (1.01-1.49) |
|                                                     | Able to confide (never vs. usually) | 3594 | 6.3  | 1.27 (1.05-1.54) | 1.22 (1.00-1.48) | 1.20 (0.99-1.46) |
| <hr/>                                               |                                     |      |      |                  |                  |                  |
|                                                     | <b>Fatal events</b>                 |      |      |                  |                  |                  |
| Composites of fatal myocardial infarction or stroke | <b>Loneliness (yes vs. no)</b>      | 1406 | 1.3  | 1.65 (0.90-3.00) | 1.23 (0.66-2.29) | 1.21 (0.65-2.25) |
|                                                     | <b>Items</b>                        |      |      |                  |                  |                  |
|                                                     | Lonely (yes vs. no)                 | 4368 | 1.0  | 1.46 (0.95-2.25) | 1.17 (0.74-1.85) | 1.13 (0.71-1.80) |
|                                                     | Able to confide (never vs. usually) | 3656 | 1.2  | 1.28 (0.83-1.97) | 1.08 (0.69-1.69) | 1.05 (0.67-1.64) |
| Fatal myocardial infarction                         | <b>Loneliness (yes vs. no)</b>      | 1406 | 1.1  | 1.70 (0.88-3.29) | 1.23 (0.62-2.44) | 1.22 (0.62-2.41) |
|                                                     | <b>Items</b>                        |      |      |                  |                  |                  |
|                                                     | Lonely (yes vs. no)                 | 4368 | 0.9  | 1.71 (1.07-2.72) | 1.34 (0.81-2.21) | 1.30 (0.79-2.15) |
|                                                     | Able to confide (never vs. usually) | 3656 | 0.9  | 1.30 (0.80-2.12) | 1.08 (0.66-1.77) | 1.06 (0.65-1.75) |
| Fatal Stroke                                        | <b>Loneliness (yes vs. no)</b>      | 1406 | 0.2  | 1.37 (0.32-5.85) | 1.26 (0.28-5.61) | 1.21 (0.27-5.43) |
|                                                     | <b>Items</b>                        |      |      |                  |                  |                  |
|                                                     | Lonely (yes vs. no)                 | 4368 | 0.1  | 0.63 (0.19-2.15) | 0.55 (0.15-1.95) | 0.53 (0.15-1.89) |
|                                                     | Able to confide (never vs. usually) | 3656 | 0.2  | 1.10 (0.41-2.98) | 1.07 (0.39-2.95) | 1.02 (0.37-2.81) |
| <hr/>                                               |                                     |      |      |                  |                  |                  |
|                                                     | <b>Non-fatal events</b>             |      |      |                  |                  |                  |



|                                                         |                                     |      |      |                  |                  |                  |
|---------------------------------------------------------|-------------------------------------|------|------|------------------|------------------|------------------|
| Composites of non-fatal myocardial infarction or stroke | <b>Loneliness (yes vs. no)</b>      | 1332 | 16.6 | 1.56 (1.31-1.87) | 1.38 (1.15-1.66) | 1.36 (1.13-1.63) |
|                                                         | <b>Items</b>                        |      |      |                  |                  |                  |
|                                                         | Lonely (yes vs. no)                 | 4192 | 13.6 | 1.38 (1.22-1.56) | 1.22 (1.07-1.39) | 1.20 (1.05-1.37) |
|                                                         | Able to confide (never vs. usually) | 3492 | 14.6 | 1.26 (1.11-1.42) | 1.18 (1.04-1.35) | 1.17 (1.03-1.34) |
| Non-fatal myocardial infarction                         | <b>Loneliness (yes vs. no)</b>      | 1352 | 10.0 | 1.44 (1.15-1.80) | 1.23 (0.97-1.55) | 1.21 (0.96-1.52) |
|                                                         | <b>Items</b>                        |      |      |                  |                  |                  |
|                                                         | Lonely (yes vs. no)                 | 4246 | 8.4  | 1.33 (1.14-1.55) | 1.14 (0.97-1.34) | 1.12 (0.95-1.32) |
|                                                         | Able to confide (never vs. usually) | 3548 | 9.4  | 1.24 (1.06-1.45) | 1.15 (0.98-1.35) | 1.14 (0.98-1.34) |
| Non-fatal stroke                                        | <b>Loneliness (yes vs. no)</b>      | 1382 | 7.0  | 1.60 (1.22-2.08) | 1.48 (1.12-1.94) | 1.45 (1.10-1.91) |
|                                                         | <b>Items</b>                        |      |      |                  |                  |                  |
|                                                         | Lonely (yes vs. no)                 | 4305 | 5.7  | 1.38 (1.15-1.67) | 1.28 (1.05-1.56) | 1.26 (1.03-1.54) |
|                                                         | Able to confide (never vs. usually) | 3594 | 6.0  | 1.28 (1.06-1.55) | 1.23 (1.01-1.50) | 1.21 (1.00-1.48) |

\*Model 1 adjusted for age and sex;

†Model 2 additionally adjusted for ethnicity, assessment centre, current employment status, education level, Townsend Deprivation Index, smoking status, alcohol consumption status, physical activity (MET Score), TV watching time, healthy diet score, sleep duration, ever seeking help from physicians due to anxiety or depressive symptoms, obesity status, grip strength, systolic blood pressure, diastolic blood pressure, hyperlipidaemia, and social isolation/loneliness;

‡Model 3 additionally adjusted for estimated glomerular filtration rate, family history of diabetes, HbA1c, diabetes duration, diabetes medication use, chronic kidney disease, diabetes-related microvascular disease, neurodegenerative disease, respiratory disease, digestive disease, rheumatoid arthritis, and osteoarthritis.

CI, confidence interval; CVD, cardiovascular disease; HR, hazard ratio; MET, metabolic equivalent of task.

**eTable 19. Proportion of mediation analysis for the association between social isolation, loneliness, and subsequent risk of mortality and MACE**

| Mediators                                                               | Social isolation                 |                                  |                                                     | Loneliness                                             |                                                         |
|-------------------------------------------------------------------------|----------------------------------|----------------------------------|-----------------------------------------------------|--------------------------------------------------------|---------------------------------------------------------|
|                                                                         | All-cause mortality              | CVD mortality                    | Composites of fatal myocardial infarction or stroke | Composites of incident myocardial infarction or stroke | Composites of non-fatal myocardial infarction or stroke |
|                                                                         | Mediating proportion (95%CI)*, % | Mediating proportion (95%CI)*, % | Mediating proportion (95%CI)*, %                    | Mediating proportion (95%CI)*, %                       | Mediating proportion (95%CI)*, %                        |
| <b>Behavioural factors</b>                                              |                                  |                                  |                                                     |                                                        |                                                         |
| Smoking status                                                          | 5.9 (3.7, 8.9)                   | 4.2 (2.4, 6.9)                   | 3.1 (0.8, 8.2)                                      | 2.6 (1.1, 5.1)                                         | 2.7 (1.1, 5.6)                                          |
| Alcohol consumption status                                              | 4.3 (1.9, 7.3)                   | 6.4 (3.5, 10.5)                  | 4.7 (0.3, 11.7)                                     | 2.7 (1.1, 4.9)                                         | 2.7 (0.9, 5.5)                                          |
| Physical activity (MET Score)                                           | 10.6 (7.2, 15.2)                 | 12.7 (8.4, 19.2)                 | 9.9 (4.0, 23.3)                                     | 4.2 (1.7, 8.0)                                         | 3.5 (0.9, 7.2)                                          |
| TV watching time                                                        | 5.9 (3.7, 9.1)                   | 6.0 (3.1, 9.8)                   | 2.5 (-2.3, 9.1)                                     | 3.8 (1.1, 7.7)                                         | 3.9 (0.7, 8.2)                                          |
| Healthy diet score                                                      | 0.8 (-0.1, 1.8)                  | 0.7 (-0.4, 2.1)                  | NA                                                  | 1.7 (-0.3, 4.3)                                        | 2.1 (-0.6, 5.3)                                         |
| Sleep duration                                                          | 2.1 (1.1, 3.8)                   | 2.1 (0.9, 4.0)                   | 0.5 (-1.1, 2.7)                                     | 6.6 (3.6, 11.2)                                        | 7.5 (4.2, 13.0)                                         |
| All significant behavioural factors                                     | 26.0 (19.5, 35.6)                | 28.2 (20.3, 43.0)                | 17.8 (8.9, 39.5)                                    | 17.6 (11.7, 28.3)                                      | 17.8 (11.3, 30.7)                                       |
| <b>Psychological factors</b>                                            |                                  |                                  |                                                     |                                                        |                                                         |
| Anxiety                                                                 | 0.2 (-0.2, 0.6)                  | 0.3 (-0.1, 1.0)                  | 0.1 (-0.6, 1.0)                                     | 0.3 (-0.3, 1.3)                                        | 0.4 (-0.3, 1.4)                                         |
| Depression                                                              | 2.1 (0.9, 3.5)                   | 1.6 (0.4, 3.5)                   | 1.9 (-0.5, 6.2)                                     | 2.4 (0.4, 5.5)                                         | 2.2 (-0.2, 5.6)                                         |
| Ever seeking help from physicians due to anxiety or depressive symptoms | 0.2 (-1.4, 1.6)                  | NA                               | NA                                                  | 4.7 (-0.5, 11.4)                                       | 5.8 (0.2, 13.2)                                         |
| All significant psychological factors                                   | NA                               | NA                               | NA                                                  | NA                                                     | NA                                                      |
| <b>Physiological factors</b>                                            |                                  |                                  |                                                     |                                                        |                                                         |
| Body mass index                                                         | 2.1 (1.1, 3.6)                   | 3.0 (1.5, 5.7)                   | 0.2 (-1.8, 2.1)                                     | 2.5 (1.1, 4.8)                                         | 2.8 (1.1, 5.7)                                          |

|                                              |                          |                          |                          |                          |                          |
|----------------------------------------------|--------------------------|--------------------------|--------------------------|--------------------------|--------------------------|
| Grip strength                                | <b>4.3 (2.7, 6.7)</b>    | <b>4.6 (2.6, 7.3)</b>    | 1.2 (-1.0, 4.4)          | <b>6.2 (3.4, 11.0)</b>   | <b>6.7 (3.5, 11.9)</b>   |
| Systolic blood pressure                      | NA                       | NA                       | NA                       | NA                       | NA                       |
| Diastolic blood pressure                     | 0.0 (-0.6, 0.7)          | 0.0 (-0.6, 0.7)          | 0.0 (-0.6, 0.8)          | 0.0 (-0.6, 0.5)          | -0.1 (-0.7, 0.4)         |
| Hyperlipidaemia                              | NA                       | NA                       | 0.0 (-0.6, 0.5)          | 0.7 (-0.3, 1.9)          | 0.8 (-0.3, 2.2)          |
| Estimated glomerular filtration rate         | 1.0 (-0.1, 2.4)          | 1.9 (-0.2, 4.2)          | 0.4 (-0.3, 1.8)          | 0.3 (-0.6, 1.5)          | 0.3 (-0.6, 1.4)          |
| All significant physiological factors        | <b>6.5 (4.3, 9.7)</b>    | <b>7.6 (5.0, 11.7)</b>   | NA                       | <b>6.0 (2.5, 10.9)</b>   | <b>6.7 (2.8, 12.5)</b>   |
| <b>Diabetes related status</b>               |                          |                          |                          |                          |                          |
| Family history of diabetes                   | <b>0.7 (0.1, 1.6)</b>    | <b>0.6 (0.0, 1.5)</b>    | 0.3 (-0.4, 1.4)          | 0.0 (-0.7, 0.5)          | 0.0 (-0.7, 0.4)          |
| HbA1c                                        | <b>2.6 (1.3, 4.4)</b>    | <b>3.4 (1.7, 5.8)</b>    | 1.5 (-0.7, 4.6)          | <b>3.7 (1.8, 6.7)</b>    | <b>4.0 (1.8, 7.4)</b>    |
| Diabetes duration                            | 0.0 (-1.3, 1.1)          | 0.0 (-1.3, 1.3)          | 0.0 (-0.7, 0.7)          | <b>2.5 (1.0, 5.0)</b>    | <b>2.7 (1.1, 5.6)</b>    |
| Diabetes medication use                      | <b>2.1 (0.7, 3.8)</b>    | <b>3.0 (1.3, 5.3)</b>    | <b>1.3 (0.1, 3.7)</b>    | <b>4.2 (2.1, 7.7)</b>    | <b>4.4 (2.2, 7.9)</b>    |
| All significant diabetes related status      | <b>4.6 (2.8, 7.3)</b>    | <b>5.6 (3.2, 9.5)</b>    | NA                       | <b>7.2 (4.4, 12.0)</b>   | <b>7.7 (4.6, 13.3)</b>   |
| <b>Comorbid conditions</b>                   |                          |                          |                          |                          |                          |
| chronic kidney disease                       | <b>1.7 (0.3, 3.5)</b>    | <b>2.0 (0.2, 4.0)</b>    | NA                       | 0.7 (0.0, 2.0)           | <b>0.9 (0.0, 2.4)</b>    |
| Diabetes-related microvascular disease       | <b>1.4 (0.3, 2.9)</b>    | <b>2.3 (0.5, 4.7)</b>    | <b>2.2 (0.3, 6.1)</b>    | <b>2.3 (0.9, 4.5)</b>    | <b>2.1 (0.8, 4.3)</b>    |
| Neurodegenerative disease                    | <b>1.1 (0.2, 2.3)</b>    | 0.4 (-0.3, 1.4)          | 0.3 (-1.1, 2.7)          | 0.2 (-0.8, 1.3)          | 0.2 (-0.8, 1.5)          |
| Respiratory disease                          | <b>3.0 (1.4, 5.0)</b>    | <b>2.6 (1.0, 4.8)</b>    | 1.9 (-0.1, 5.5)          | <b>1.5 (0.2, 3.8)</b>    | 1.4 (-0.2, 3.6)          |
| Digestive disease                            | <b>1.6 (0.5, 2.9)</b>    | <b>1.0 (0.1, 2.3)</b>    | 0.2 (-1.2, 1.9)          | 0.4 (0.0, 1.4)           | 0.5 (-0.1, 1.5)          |
| Rheumatoid arthritis                         | NA                       | NA                       | NA                       | 0.0 (-0.5, 0.6)          | 0.0 (-0.7, 0.7)          |
| Osteoarthritis                               | 0.2 (-0.3, 0.7)          | 0.0 (-0.6, 0.8)          | 0.3 (-0.7, 1.8)          | 1.1 (0.1, 2.6)           | 1.2 (0.1, 2.9)           |
| All significant comorbid conditions          | <b>8.4 (5.4, 12.4)</b>   | <b>7.3 (3.9, 12.0)</b>   | NA                       | <b>4.9 (2.3, 8.4)</b>    | <b>4.1 (1.9, 7.7)</b>    |
| <b>All significant mediators<sup>†</sup></b> | <b>37.6 (28.7, 51.6)</b> | <b>38.0 (28.0, 55.6)</b> | <b>19.8 (10.2, 42.4)</b> | <b>29.8 (20.3, 47.1)</b> | <b>32.3 (20.8, 56.6)</b> |

Results marked in BOLD were statistically significant. NA: proportion mediated was not calculated when the point estimate of the direct effect was in a direction opposite to that of the indirect effect.

\*Mediation analysis adjusted for age, sex, ethnicity, assessment centre, current employment status, education level, and Townsend Deprivation Index.

†All significant mediators of single mediation analyses are included in the multiple mediation analyses.

CVD, cardiovascular disease; MACE, major adverse cardiovascular events; MET, metabolic equivalent of task.

**eTable 20. Hazard ratios and 95% CI from the Fine-Gray subdistribution Hazard Models for composites of incident myocardial infarction or stroke**

| Variables                                 | Model 1*         |         | Model 2†         |         | Model 3‡         |         |
|-------------------------------------------|------------------|---------|------------------|---------|------------------|---------|
|                                           | sHR (95% CI)     | P value | sHR (95% CI)     | P value | sHR (95% CI)     | P value |
| <b>Social isolation</b>                   |                  |         |                  |         |                  |         |
| Least isolated                            | 1.00 [Reference] |         | 1.00 [Reference] |         | 1.00 [Reference] |         |
| Moderately isolated                       | 1.07 (0.96-1.20) | 0.220   | 0.98 (0.87-1.10) | 0.760   | 0.97 (0.86-1.09) | 0.610   |
| Most isolated                             | 1.21 (1.06-1.39) | 0.006   | 0.98 (0.85-1.13) | 0.800   | 0.97 (0.83-1.12) | 0.640   |
| <b>Items of social isolation</b>          |                  |         |                  |         |                  |         |
| <b>Contact with family/friends/groups</b> |                  |         |                  |         |                  |         |
| More                                      | 1.00 [Reference] |         | 1.00 [Reference] |         | 1.00 [Reference] |         |
| Little                                    | 1.08 (0.98-1.19) | 0.140   | 0.96 (0.87-1.07) | 0.500   | 0.95 (0.86-1.06) | 0.350   |
| <b>Live alone</b>                         |                  |         |                  |         |                  |         |
| No                                        | 1.00 [Reference] |         | 1.00 [Reference] |         | 1.00 [Reference] |         |
| Yes                                       | 1.14 (1.02-1.28) | 0.026   | 1.00 (0.88-1.13) | 0.990   | 0.99 (0.88-1.12) | 0.940   |
| <b>Loneliness</b>                         |                  |         |                  |         |                  |         |
| No                                        | 1.00 [Reference] |         | 1.00 [Reference] |         | 1.00 [Reference] |         |
| Yes                                       | 1.57 (1.33-1.86) | <0.001  | 1.32 (1.11-1.57) | 0.002   | 1.30 (1.10-1.55) | 0.003   |
| <b>Items of loneliness</b>                |                  |         |                  |         |                  |         |
| <b>Lonely</b>                             |                  |         |                  |         |                  |         |
| No                                        | 1.00 [Reference] |         | 1.00 [Reference] |         | 1.00 [Reference] |         |
| Yes                                       | 1.38 (1.23-1.55) | <0.001  | 1.17 (1.04-1.33) | 0.011   | 1.16 (1.02-1.31) | 0.020   |
| <b>Able to confide</b>                    |                  |         |                  |         |                  |         |

|                    |                  |        |                  |       |                  |       |
|--------------------|------------------|--------|------------------|-------|------------------|-------|
| Usually            | 1.00 [Reference] |        | 1.00 [Reference] |       | 1.00 [Reference] |       |
| Never/Almost never | 1.28 (1.14-1.44) | <0.001 | 1.18 (1.04-1.33) | 0.009 | 1.16 (1.03-1.31) | 0.014 |

\*Model 1 adjusted for age and sex;

†Model 2 additionally adjusted for ethnicity, assessment centre, current employment status, education level, Townsend Deprivation Index, smoking status, alcohol consumption status, physical activity (MET Score), TV watching time, healthy diet score, sleep duration, ever seeking help from physicians due to anxiety or depressive symptoms, obesity status, grip strength, systolic blood pressure, diastolic blood pressure, hyperlipidaemia, and social isolation/loneliness;

‡Model 3 additionally adjusted for estimated glomerular filtration rate, family history of diabetes, HbA1c, diabetes duration, diabetes medication use, chronic kidney disease, diabetes-related microvascular disease, neurodegenerative disease, respiratory disease, digestive disease, rheumatoid arthritis, and osteoarthritis.

CI, confidence interval; CVD, cardiovascular disease; HR, hazard ratio; MET, metabolic equivalent of task.

**eTable 21. Multivariable-adjusted hazard ratios of mortality and composites of myocardial infarction or stroke for social isolation across subgroups**

|                                   | All-cause mortality  |                  |                          | Composites of incident myocardial infarction or stroke |                  |                          |
|-----------------------------------|----------------------|------------------|--------------------------|--------------------------------------------------------|------------------|--------------------------|
|                                   | Moderately vs. least | Most vs. least   | P <sub>interaction</sub> | Moderately vs. least                                   | Most vs. least   | P <sub>interaction</sub> |
|                                   | HR (95% CI)          | HR (95% CI)*     |                          | HR (95% CI)                                            | HR (95% CI)*     |                          |
| <b>Age</b>                        |                      |                  | 0.308                    |                                                        |                  | 0.749                    |
| <60                               | 1.10 (0.91-1.33)     | 1.37 (1.11-1.68) |                          | 1.01 (0.84-1.22)                                       | 0.97 (0.78-1.20) |                          |
| ≥60                               | 1.16 (1.06-1.28)     | 1.30 (1.15-1.47) |                          | 1.01 (0.90-1.13)                                       | 1.02 (0.89-1.18) |                          |
| <b>Sex</b>                        |                      |                  | 0.996                    |                                                        |                  | 0.635                    |
| Female                            | 1.16 (0.99-1.36)     | 1.22 (1.00-1.49) |                          | 1.00 (0.84-1.19)                                       | 0.88 (0.70-1.10) |                          |
| Male                              | 1.15 (1.04-1.28)     | 1.36 (1.21-1.55) |                          | 1.02 (0.91-1.14)                                       | 1.06 (0.92-1.21) |                          |
| <b>Ethnicity</b>                  |                      |                  | 0.463                    |                                                        |                  | 0.037                    |
| Non-white                         | 1.14 (1.04-1.25)     | 1.33 (1.20-1.49) |                          | 1.05 (0.95-1.16)                                       | 1.06 (0.93-1.20) |                          |
| White                             | 1.35 (0.98-1.86)     | 1.31 (0.89-1.94) |                          | 0.78 (0.58-1.03)                                       | 0.70 (0.49-1.02) |                          |
| <b>Townsend Deprivation Index</b> |                      |                  | 0.470                    |                                                        |                  | 0.709                    |
| Tertile 1                         | 0.98 (0.84-1.14)     | 1.26 (1.03-1.55) |                          | 0.99 (0.84-1.17)                                       | 1.03 (0.82-1.30) |                          |
| Tertile 2                         | 1.21 (1.04-1.41)     | 1.36 (1.12-1.64) |                          | 0.97 (0.83-1.15)                                       | 1.11 (0.91-1.37) |                          |
| Tertile 3                         | 1.34 (1.15-1.57)     | 1.48 (1.25-1.76) |                          | 1.09 (0.93-1.29)                                       | 0.96 (0.79-1.16) |                          |
| <b>Smoking status</b>             |                      |                  | 0.583                    |                                                        |                  | 0.059                    |
| Never                             | 1.24 (1.07-1.43)     | 1.31 (1.09-1.56) |                          | 0.93 (0.80-1.08)                                       | 0.87 (0.72-1.05) |                          |
| Previous                          | 1.12 (0.99-1.26)     | 1.29 (1.11-1.51) |                          | 1.10 (0.96-1.26)                                       | 1.06 (0.88-1.27) |                          |
| Current                           | 1.17 (0.92-1.49)     | 1.48 (1.15-1.92) |                          | 1.06 (0.81-1.39)                                       | 1.21 (0.90-1.63) |                          |
| <b>Alcohol consumption status</b> |                      |                  | 0.474                    |                                                        |                  | 0.438                    |

|                                      |                  |                  |       |                  |                  |
|--------------------------------------|------------------|------------------|-------|------------------|------------------|
| Not current                          | 1.23 (0.98-1.56) | 1.65 (1.28-2.11) |       | 0.97 (0.76-1.24) | 0.93 (0.70-1.24) |
| Less than three times a week         | 1.20 (1.06-1.36) | 1.22 (1.05-1.41) |       | 1.13 (0.99-1.29) | 1.12 (0.95-1.31) |
| Three or more times a week           | 1.06 (0.91-1.23) | 1.40 (1.15-1.69) |       | 0.88 (0.75-1.04) | 0.88 (0.70-1.12) |
| <b>Physical activity (MET Score)</b> |                  |                  | 0.081 |                  | 0.303            |
| Tertile 1                            | 1.19 (1.03-1.36) | 1.22 (1.03-1.43) |       | 1.03 (0.88-1.20) | 1.00 (0.83-1.20) |
| Tertile 2                            | 1.01 (0.87-1.18) | 1.37 (1.14-1.64) |       | 0.93 (0.79-1.09) | 0.98 (0.80-1.21) |
| Tertile 3                            | 1.30 (1.10-1.54) | 1.56 (1.26-1.92) |       | 1.10 (0.92-1.30) | 1.03 (0.82-1.31) |
| <b>Obesity status</b>                |                  |                  | 0.519 |                  | 0.436            |
| Underweight or normal weight         | 1.07 (0.92-1.25) | 1.34 (1.11-1.62) |       | 1.00 (0.85-1.17) | 1.05 (0.85-1.29) |
| Overweight                           | 1.41 (1.05-1.91) | 1.61 (1.13-2.29) |       | 1.02 (0.71-1.46) | 1.24 (0.81-1.90) |
| Obese                                | 1.18 (1.05-1.32) | 1.30 (1.14-1.49) |       | 1.02 (0.90-1.16) | 0.97 (0.83-1.13) |
| <b>HbA1c</b>                         |                  |                  | 0.822 |                  | 0.238            |
| <53 mmol/mol                         | 1.12 (1.00-1.26) | 1.30 (1.13-1.50) |       | 1.04 (0.92-1.19) | 1.15 (0.98-1.35) |
| ≥53 mmol/mol                         | 1.23 (1.07-1.41) | 1.39 (1.19-1.63) |       | 0.99 (0.86-1.14) | 0.88 (0.74-1.05) |

\*HRs were adjusted for age, sex, ethnicity, assessment centre, current employment status, education level, Townsend Deprivation Index, smoking status, alcohol consumption status, physical activity (MET Score), TV watching time, healthy diet score, sleep duration, ever seeking help from physicians due to anxiety or depressive symptoms, obesity status, grip strength, systolic blood pressure, diastolic blood pressure, hyperlipidaemia, social isolation/loneliness, estimated glomerular filtration rate, family history of diabetes, HbA1c, diabetes duration, diabetes medication use, chronic kidney disease, diabetes-related microvascular disease, neurodegenerative disease, respiratory disease, digestive disease, rheumatoid arthritis, and osteoarthritis.

CI, confidence interval; CVD, cardiovascular disease; HR, hazard ratio; MET, metabolic equivalent of task.



**eTable 22. Multivariable-adjusted hazard ratios of mortality and composites of myocardial infarction or stroke for loneliness across subgroups**

|                                   | All-cause mortality     |                          | Composites of incident myocardial infarction or stroke |                          |
|-----------------------------------|-------------------------|--------------------------|--------------------------------------------------------|--------------------------|
|                                   | Loneliness (yes vs. no) |                          | Loneliness (yes vs. no)                                |                          |
|                                   | HR (95% CI)*            | P <sub>interaction</sub> | HR (95% CI)*                                           | P <sub>interaction</sub> |
| <b>Age</b>                        |                         | 0.443                    |                                                        | 0.244                    |
| <60                               | 1.00 (0.79-1.27)        |                          | 1.46 (1.16-1.83)                                       |                          |
| ≥60                               | 0.96 (0.82-1.14)        |                          | 1.27 (1.07-1.52)                                       |                          |
| <b>Sex</b>                        |                         | 0.955                    |                                                        | 0.180                    |
| Female                            | 0.96 (0.75-1.24)        |                          | 1.11 (0.84-1.46)                                       |                          |
| Male                              | 1.02 (0.87-1.19)        |                          | 1.47 (1.26-1.73)                                       |                          |
| <b>Ethnicity</b>                  |                         | 0.135                    |                                                        | 0.117                    |
| Non-white                         | 1.03 (0.90-1.19)        |                          | 1.31 (1.13-1.52)                                       |                          |
| White                             | 0.64 (0.36-1.13)        |                          | 1.91 (1.30-2.82)                                       |                          |
| <b>Townsend Deprivation Index</b> |                         | 0.243                    |                                                        | 0.773                    |
| Tertile 1                         | 1.35 (1.05-1.75)        |                          | 1.54 (1.17-2.04)                                       |                          |
| Tertile 2                         | 0.79 (0.60-1.04)        |                          | 1.14 (0.87-1.49)                                       |                          |
| Tertile 3                         | 0.97 (0.80-1.18)        |                          | 1.43 (1.17-1.75)                                       |                          |
| <b>Smoking status</b>             |                         | 0.859                    |                                                        | 0.229                    |
| Never                             | 1.07 (0.84-1.36)        |                          | 1.33 (1.05-1.68)                                       |                          |
| Previous                          | 0.90 (0.74-1.11)        |                          | 1.26 (1.02-1.56)                                       |                          |
| Current                           | 1.04 (0.79-1.36)        |                          | 1.70 (1.27-2.28)                                       |                          |
| <b>Alcohol consumption status</b> |                         | 0.754                    |                                                        | 0.601                    |

|                                      |                  |                  |       |
|--------------------------------------|------------------|------------------|-------|
| Not current                          | 0.89 (0.67-1.19) | 1.33 (0.98-1.81) |       |
| Less than three times a week         | 1.14 (0.95-1.37) | 1.30 (1.08-1.57) |       |
| Three or more times a week           | 0.83 (0.63-1.10) | 1.60 (1.22-2.11) |       |
| <b>Physical activity (MET Score)</b> |                  |                  | 0.746 |
| Tertile 1                            | 1.07 (0.88-1.28) | 1.36 (1.11-1.67) |       |
| Tertile 2                            | 0.87 (0.67-1.13) | 1.50 (1.18-1.91) |       |
| Tertile 3                            | 1.01 (0.76-1.35) | 1.23 (0.92-1.66) |       |
| <b>Obesity status</b>                |                  |                  | 0.512 |
| Underweight or normal weight         | 1.04 (0.80-1.36) | 1.32 (1.01-1.72) |       |
| Overweight                           | 0.96 (0.61-1.51) | 1.58 (0.93-2.71) |       |
| Obese                                | 0.99 (0.84-1.17) | 1.37 (1.15-1.62) |       |
| <b>HbA1c</b>                         |                  |                  | 0.134 |
| <53 mmol/mol                         | 0.94 (0.77-1.13) | 1.36 (1.12-1.65) |       |
| ≥53 mmol/mol                         | 1.06 (0.87-1.28) | 1.36 (1.12-1.66) | 0.430 |

\*HRs were adjusted for age, sex, ethnicity, assessment centre, current employment status, education level, Townsend Deprivation Index, smoking status, alcohol consumption status, physical activity (MET Score), TV watching time, healthy diet score, sleep duration, ever seeking help from physicians due to anxiety or depressive symptoms, obesity status, grip strength, systolic blood pressure, diastolic blood pressure, hyperlipidaemia, social isolation/loneliness, estimated glomerular filtration rate, family history of diabetes, HbA1c, diabetes duration, diabetes medication use, chronic kidney disease, diabetes-related microvascular disease, neurodegenerative disease, respiratory disease, digestive disease, rheumatoid arthritis, and osteoarthritis.

CI, confidence interval; CVD, cardiovascular disease; HR, hazard ratio; MET, metabolic equivalent of task.

**eTable 23. Multivariable-adjusted hazard ratios of social isolation and loneliness with subsequent risk for mortality, myocardial infarction, and stroke**

| Outcomes                           | Exposures                   | Model 1*         |                          | Model 2†         |                          | Model 3‡         |                          |
|------------------------------------|-----------------------------|------------------|--------------------------|------------------|--------------------------|------------------|--------------------------|
|                                    |                             | HR (95% CI)      | P <sub>interaction</sub> | HR (95% CI)      | P <sub>interaction</sub> | HR (95% CI)      | P <sub>interaction</sub> |
| <b>Mortality</b>                   |                             |                  |                          |                  |                          |                  |                          |
| All-cause mortality                | Social isolation            | 1.29 (1.22-1.36) |                          | 1.17 (1.11-1.23) |                          | 1.15 (1.09-1.22) |                          |
|                                    | Loneliness                  | 1.19 (0.91-1.55) |                          | 1.02 (0.78-1.33) |                          | 1.01 (0.77-1.32) |                          |
|                                    | Social isolation*loneliness | 1.01 (0.84-1.21) | 0.894                    | 0.98 (0.82-1.18) | 0.864                    | 0.99 (0.82-1.19) | 0.911                    |
| CVD mortality                      | Social isolation            | 1.34 (1.25-1.45) |                          | 1.19 (1.10-1.29) |                          | 1.17 (1.08-1.26) |                          |
|                                    | Loneliness                  | 1.19 (0.81-1.75) |                          | 1.01 (0.69-1.49) |                          | 1.00 (0.68-1.48) |                          |
|                                    | Social isolation*loneliness | 1.03 (0.80-1.33) | 0.815                    | 1.01 (0.78-1.31) | 0.938                    | 1.02 (0.79-1.33) | 0.859                    |
| <b>Overall</b>                     |                             |                  |                          |                  |                          |                  |                          |
| Composites of incident myocardial  | Social isolation            | 1.10 (1.03-1.16) |                          | 1.01 (0.95-1.08) |                          | 1.01 (0.95-1.07) |                          |
|                                    | Loneliness                  | 1.67 (1.30-2.14) |                          | 1.48 (1.15-1.90) |                          | 1.46 (1.13-1.87) |                          |
|                                    | Social isolation*loneliness | 0.95 (0.80-1.14) | 0.603                    | 0.95 (0.79-1.13) | 0.543                    | 0.95 (0.79-1.14) | 0.574                    |
| <b>Fatal events</b>                |                             |                  |                          |                  |                          |                  |                          |
| Composites of fatal myocardial     | Social isolation            | 1.57 (1.26-1.94) |                          | 1.39 (1.11-1.73) |                          | 1.38 (1.10-1.72) |                          |
|                                    | Loneliness                  | 1.54 (0.55-4.32) |                          | 1.34 (0.48-3.79) |                          | 1.30 (0.46-3.65) |                          |
|                                    | Social isolation*loneliness | 0.96 (0.49-1.89) | 0.917                    | 0.96 (0.49-1.89) | 0.906                    | 0.99 (0.50-1.94) | 0.970                    |
| <b>Non-fatal events</b>            |                             |                  |                          |                  |                          |                  |                          |
| Composites of non-fatal myocardial | Social isolation            | 1.07 (1.00-1.13) |                          | 0.99 (0.93-1.05) |                          | 0.98 (0.92-1.05) |                          |

|                             |                  |       |                  |       |                  |       |
|-----------------------------|------------------|-------|------------------|-------|------------------|-------|
| Loneliness                  | 1.67 (1.29-2.16) |       | 1.49 (1.15-1.92) |       | 1.47 (1.13-1.90) |       |
| Social isolation*loneliness | 0.95 (0.79-1.15) | 0.595 | 0.94 (0.78-1.14) | 0.536 | 0.94 (0.78-1.14) | 0.544 |

\*Model 1 adjusted for age and sex;

†Model 2 additionally adjusted for ethnicity, assessment centre, current employment status, education level, Townsend Deprivation Index, smoking status, alcohol consumption status, physical activity (MET Score), TV watching time, healthy diet score, sleep duration, ever seeking help from physicians due to anxiety or depressive symptoms, obesity status, grip strength, systolic blood pressure, diastolic blood pressure, hyperlipidaemia, and social isolation\*loneliness;

‡Model 3 additionally adjusted for estimated glomerular filtration rate, family history of diabetes, HbA1c, diabetes duration, diabetes medication use, chronic kidney disease, diabetes-related microvascular disease, neurodegenerative disease, respiratory disease, digestive disease, rheumatoid arthritis, and osteoarthritis.

CI, confidence interval; CVD, cardiovascular disease; HR, hazard ratio; MET, metabolic equivalent of task.
